# Supplementary material for: Structural and electronic forms of doubly oxido/Pz and triply oxido/(Pz)2 bridged mixed valent and isovalent diruthenium complexes (Pz = pyrazolate)
Source: Royal Society of Chemistry journal article supplement (doi:10.1039/d1dt03076k), 2021-01-01

## Supporting Information

**Structural and electronic forms of doubly oxido/Pz and triply oxido/(Pz)<sub>2</sub>  
bridged mixed valent and isovalent diruthenium complexes  
(Pz=Pyrazolate)**

Sudip Kumar Bera and Goutam Kumar Lahiri\*

*Department of Chemistry, Indian Institute of Technology Bombay, Powai, Mumbai-400076,*

*India, E-mail: [lahiri@chem.iitb.ac.in](mailto:lahiri@chem.iitb.ac.in)*

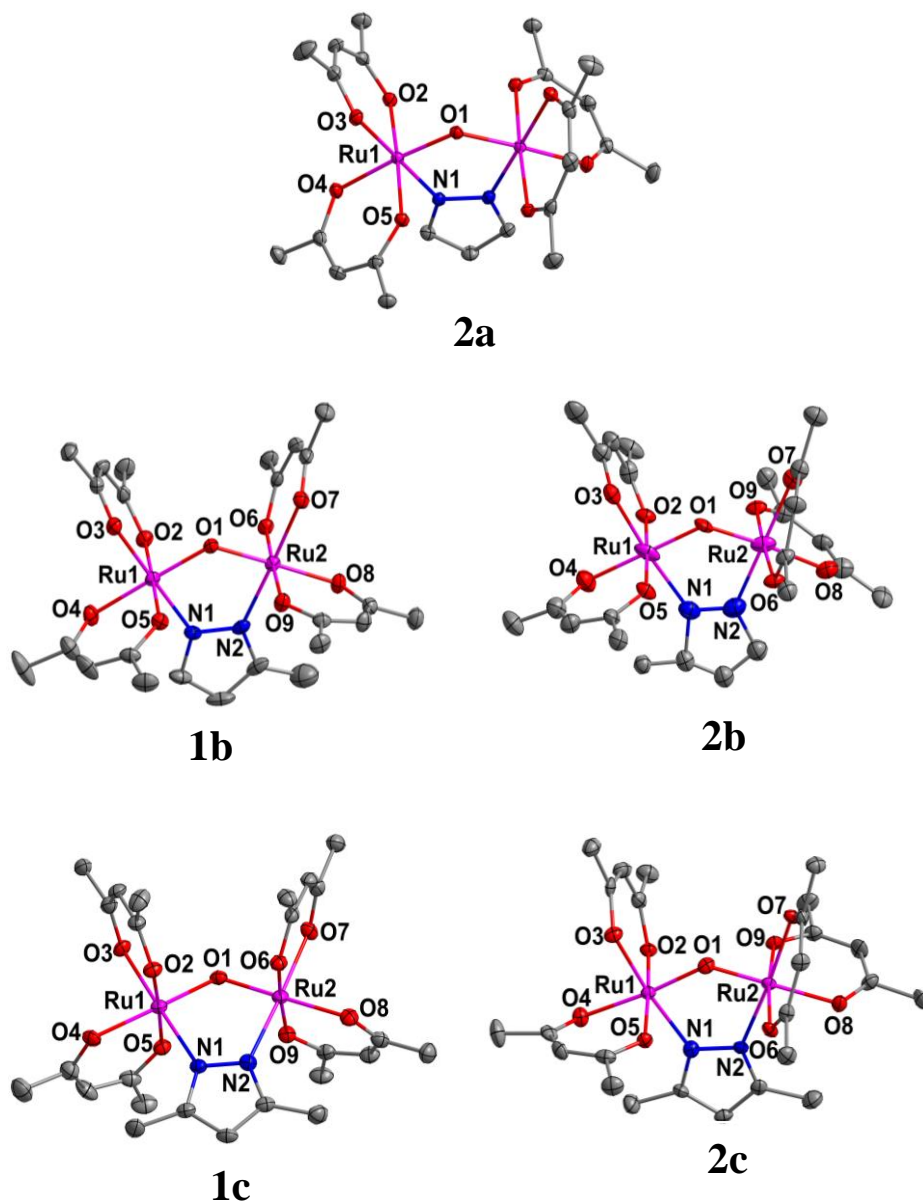

**Fig. S1** Perspective views of the complexes. Ellipsoids are drawn at 30% probability level. Hydrogen atoms are omitted for clarity.

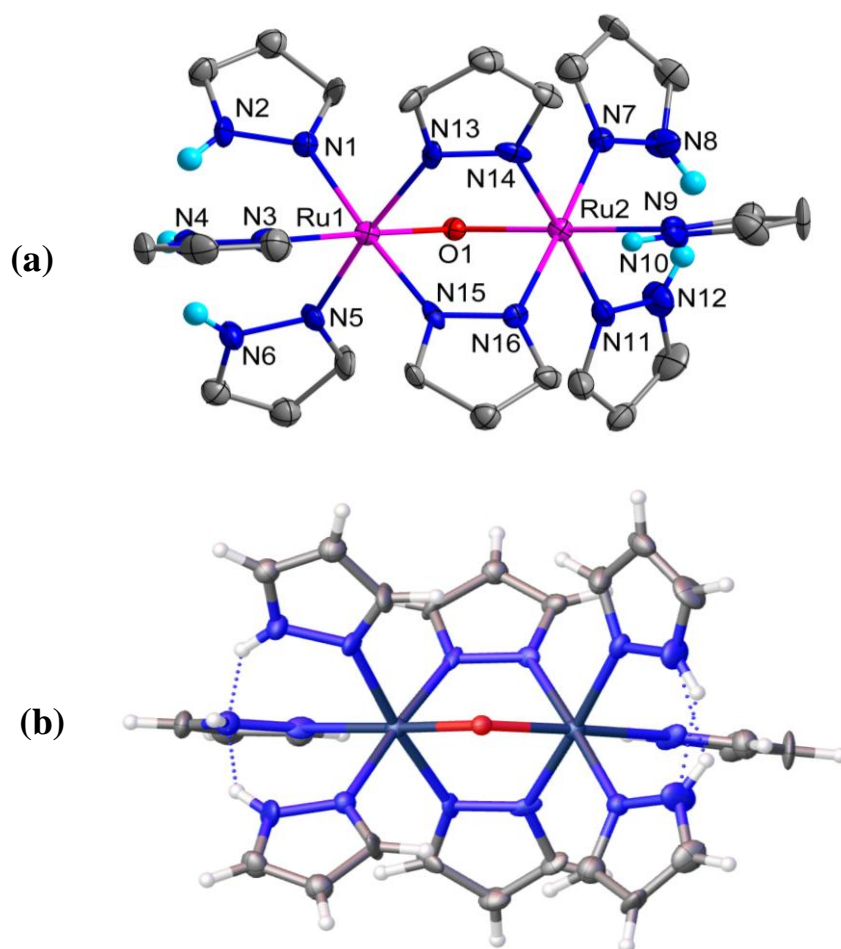

**Fig. S2** (a) Perspective view of **3a**. Ellipsoids are drawn at 30% probability level. Except N-H other hydrogen atoms are omitted for clarity. (b) Olex graphic of complex **3a** showing hydrogen bonding interactions.

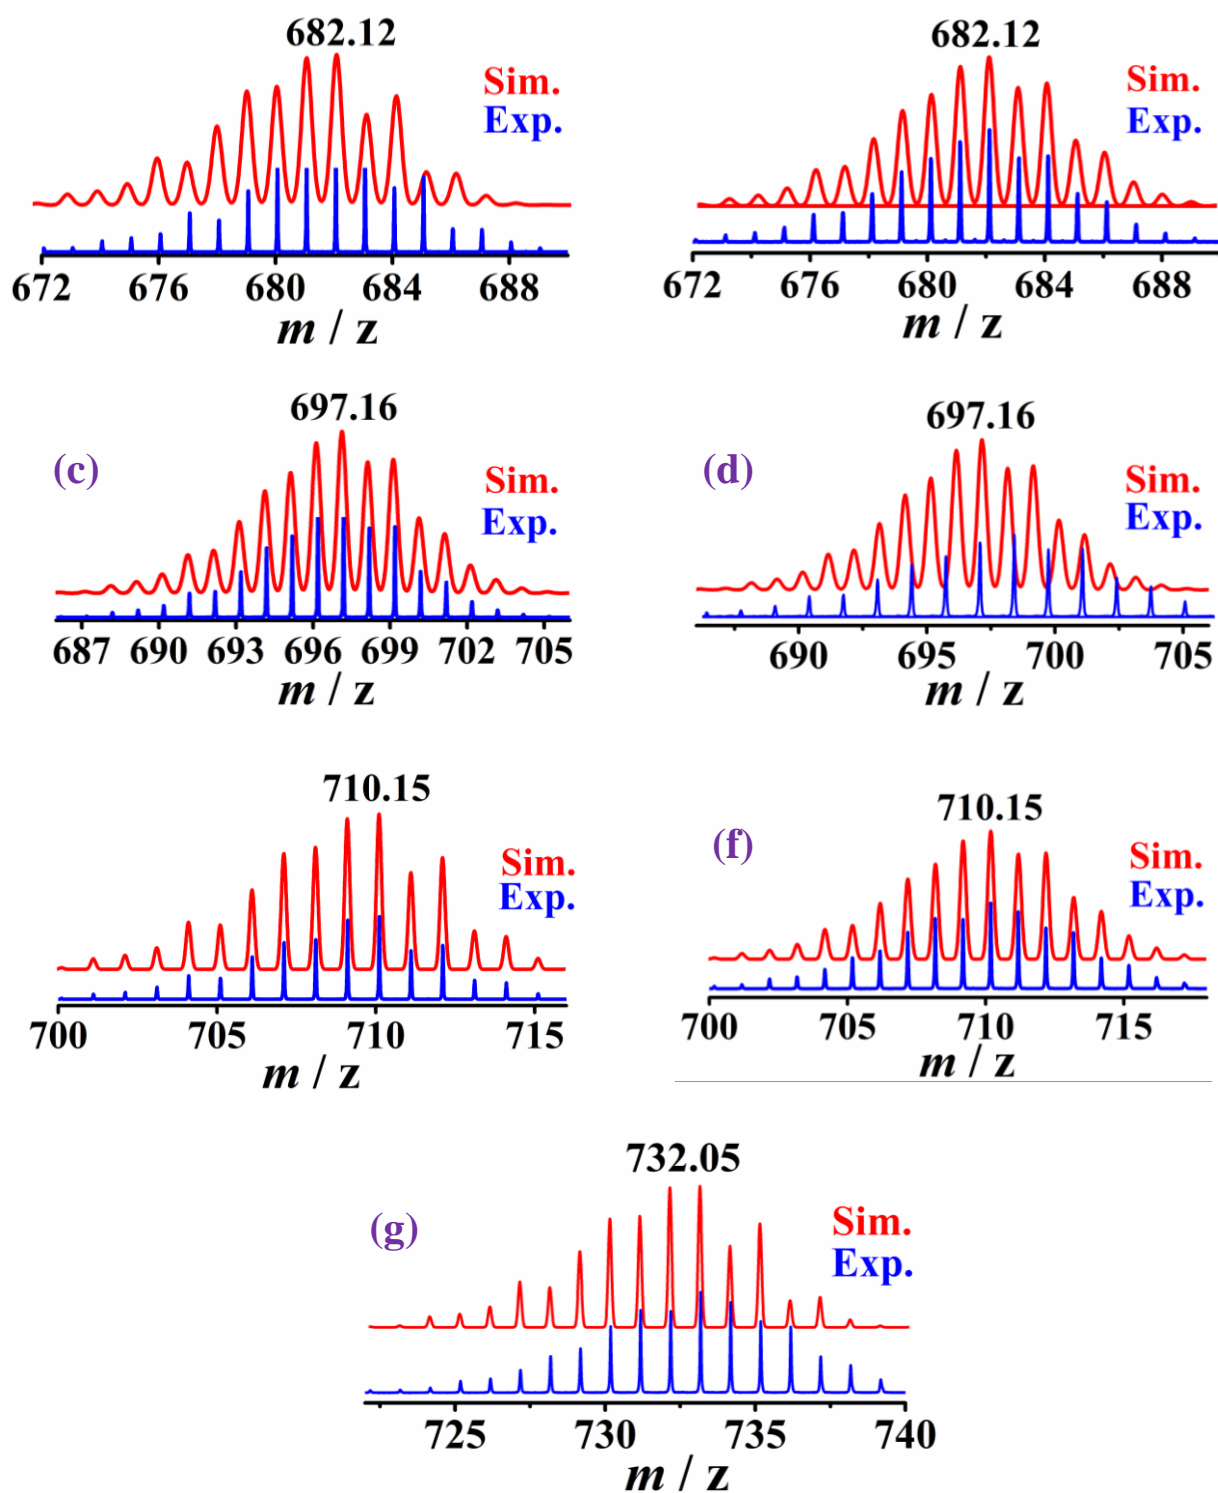

**Fig. S3a** ESI (+) mass spectra of (a)  $\{1\mathbf{a}+\text{H}\}^+$ , (b)  $\{2\mathbf{a}+\text{H}\}^+$ , (c)  $\{1\mathbf{b}+\text{H}\}^+$ , (d)  $\{2\mathbf{b}+\text{H}\}^+$ , (e)  $\{1\mathbf{c}+\text{H}\}^+$ , (f)  $\{2\mathbf{c}+\text{H}\}^+$  and (g)  $\{2\mathbf{d}+\text{H}\}^+$  in  $\text{CH}_3\text{CN}$ .

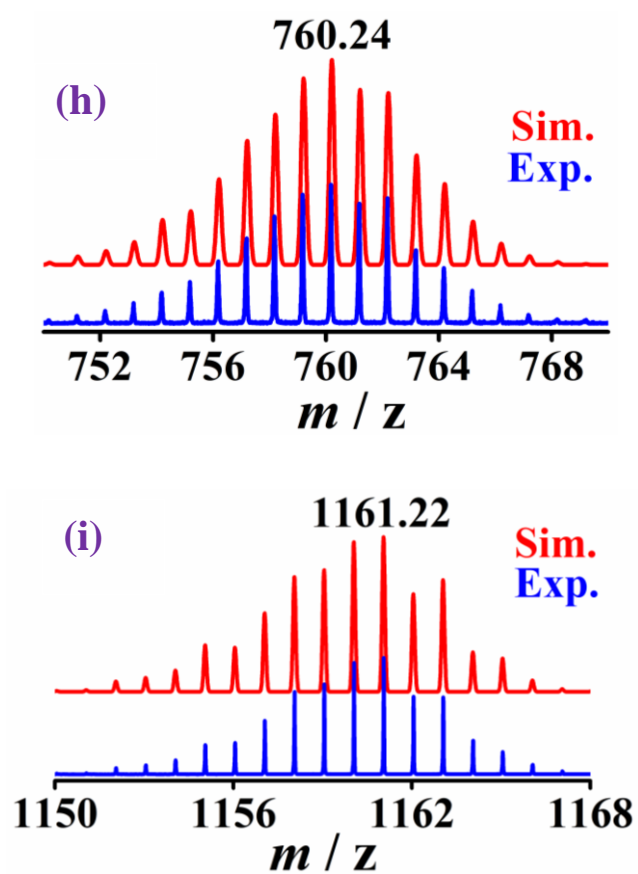

**Fig. S3b** ESI (+) mass spectra of (h)  $\{3\mathbf{a}+\mathbf{H}\}^+$  and (i)  $\{3\mathbf{d}+\mathbf{H}\}^+$  in  $\text{CH}_3\text{CN}$ .

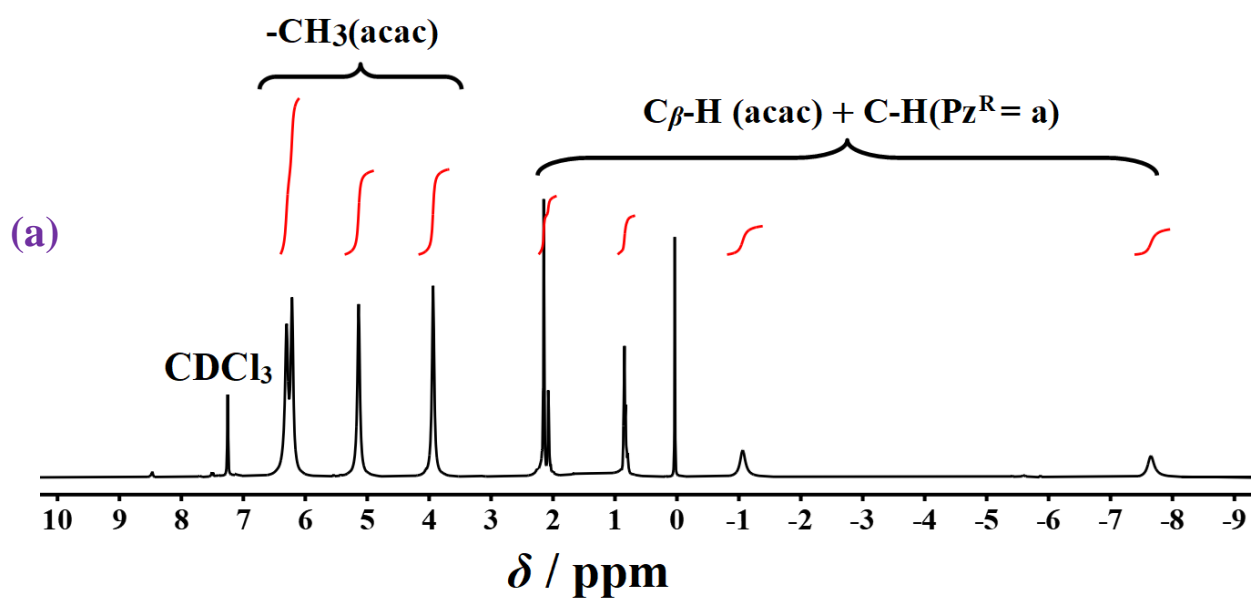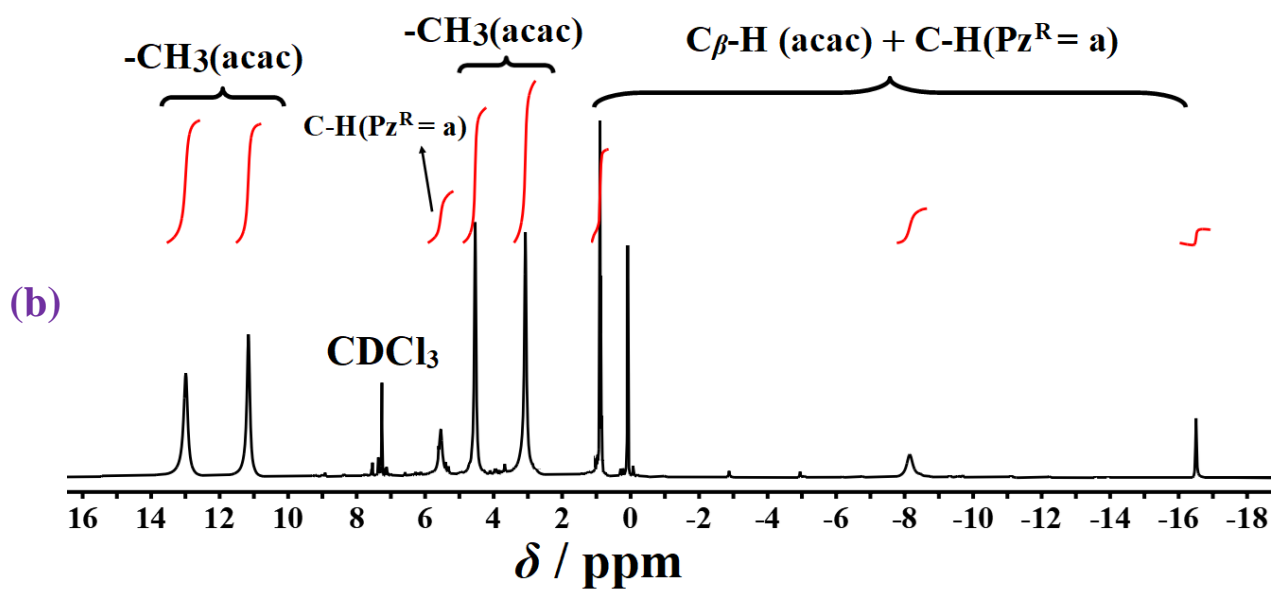

Fig. S4a  $^1\text{H}$  NMR spectra of (a) **1a** and (b) **2a** in  $\text{CDCl}_3$ .

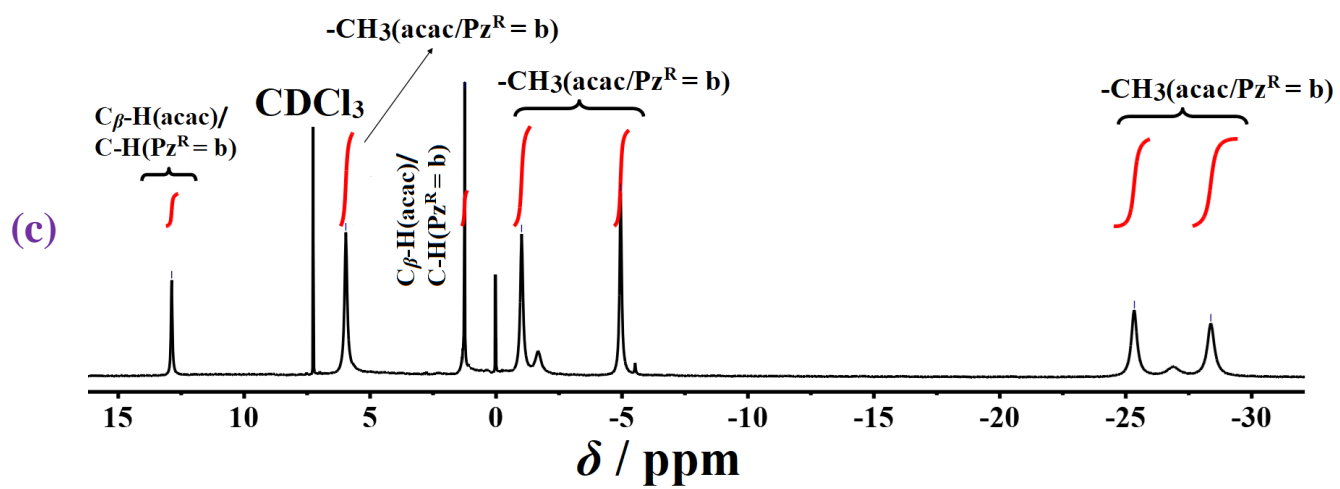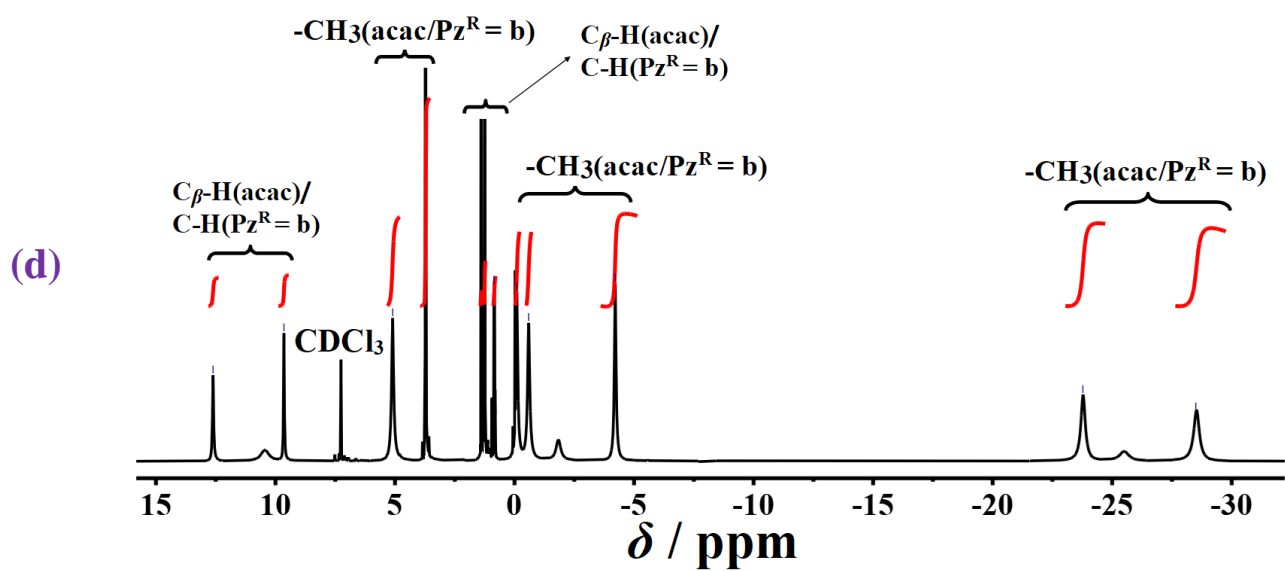

Fig. S4b  $^1\text{H}$  NMR spectra of (c) **1b** and (d) **2b** in  $\text{CDCl}_3$ .

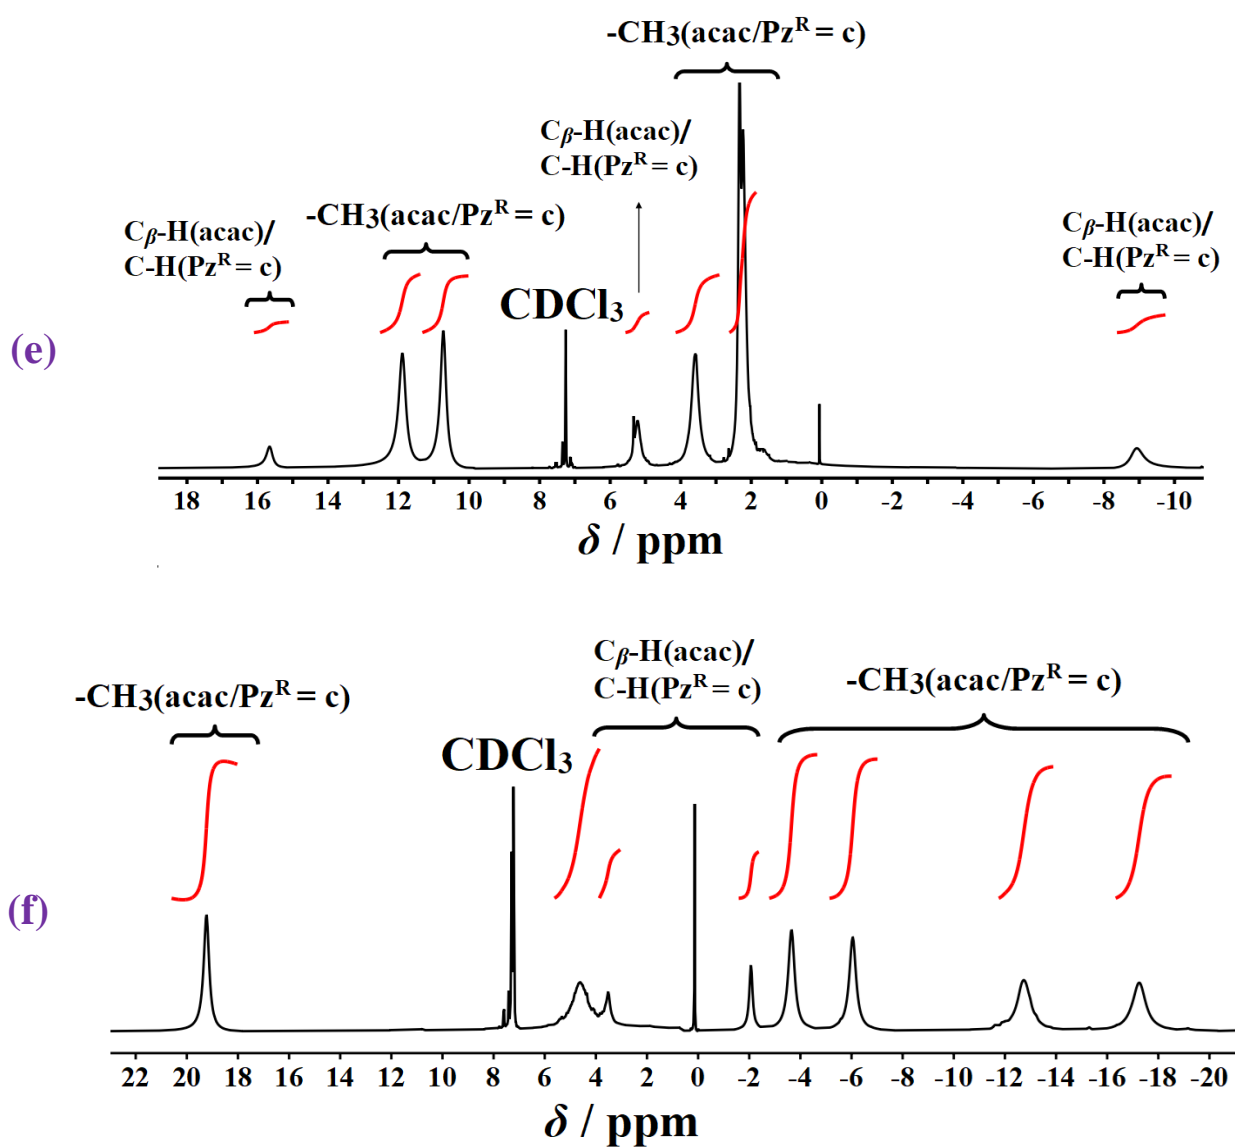

**Fig. S4c**  $^1\text{H}$  NMR spectra of (e) **1c** and (f) **2c** in  $\text{CDCl}_3$ .



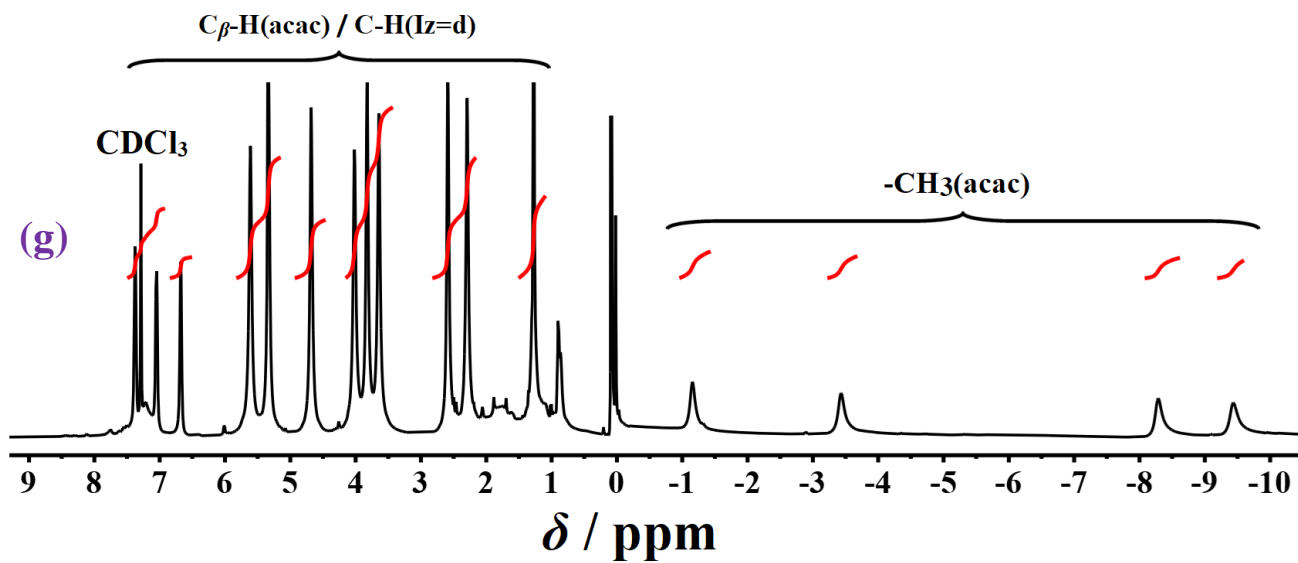

Fig. S4d  $^1\text{H}$  NMR spectra of (g) **2d** in  $\text{CDCl}_3$ .

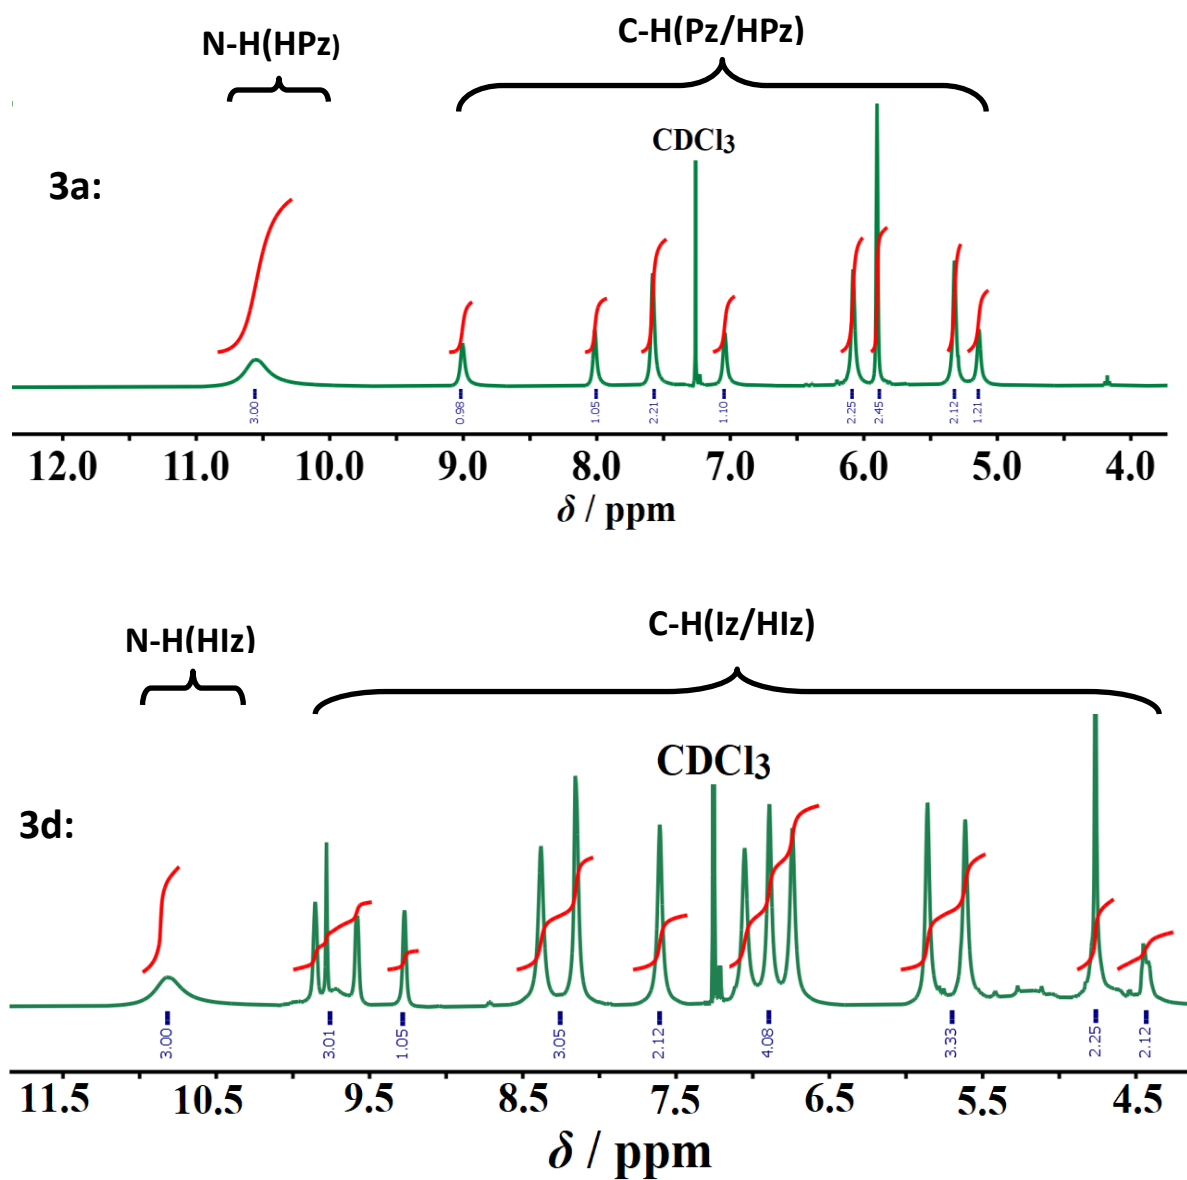

**Fig. S5** 500 MHz  $^1\text{H}$  NMR spectra of **3a** and **3d** in  $\text{CDCl}_3$  with TMS ( $\delta = 0$  ppm) as an internal standard.

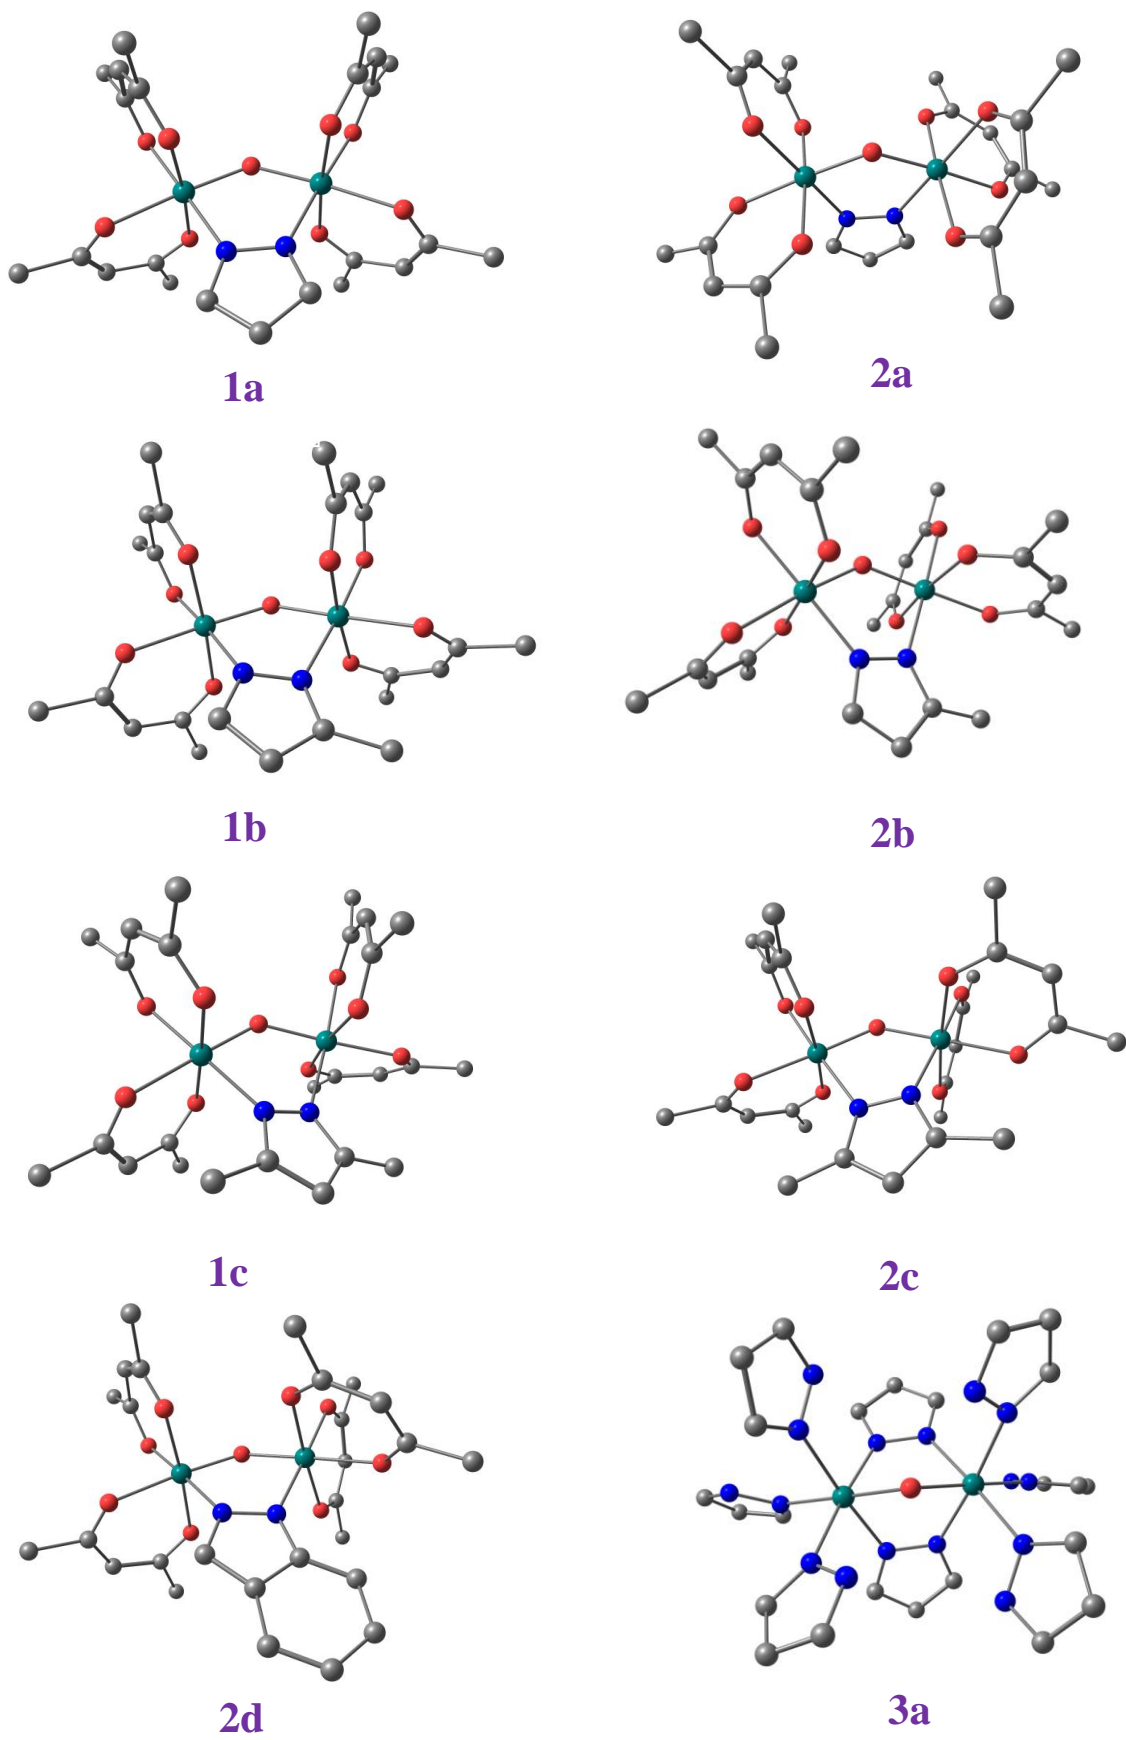

**Fig. S6** DFT (M06L/LanL2DZ/6-31G\*) optimised structures.

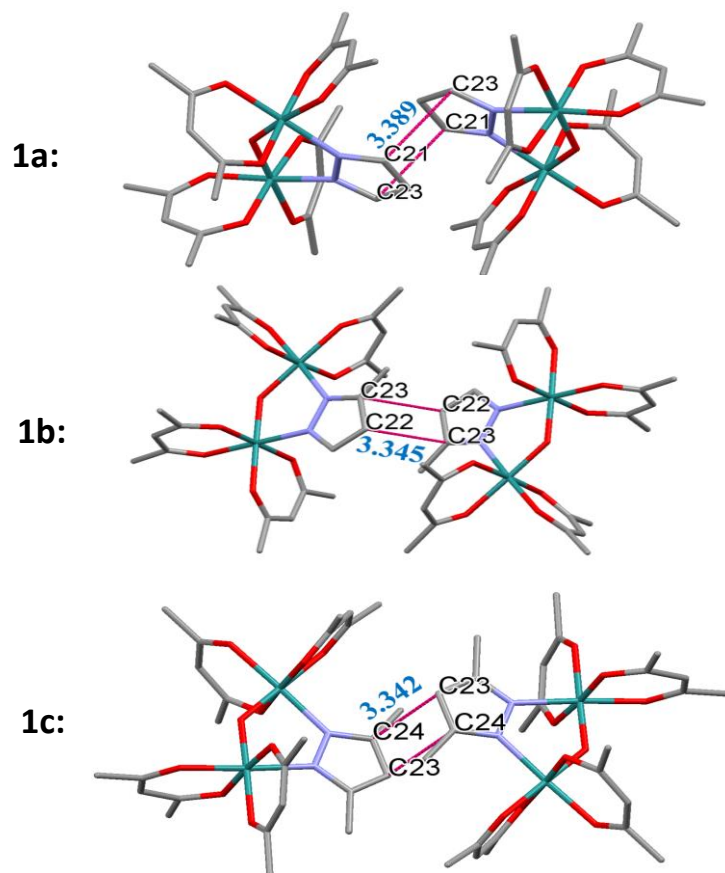

**Fig. S7** Intermolecular  $\pi$ - $\pi$  interaction in terms of distance in Å.

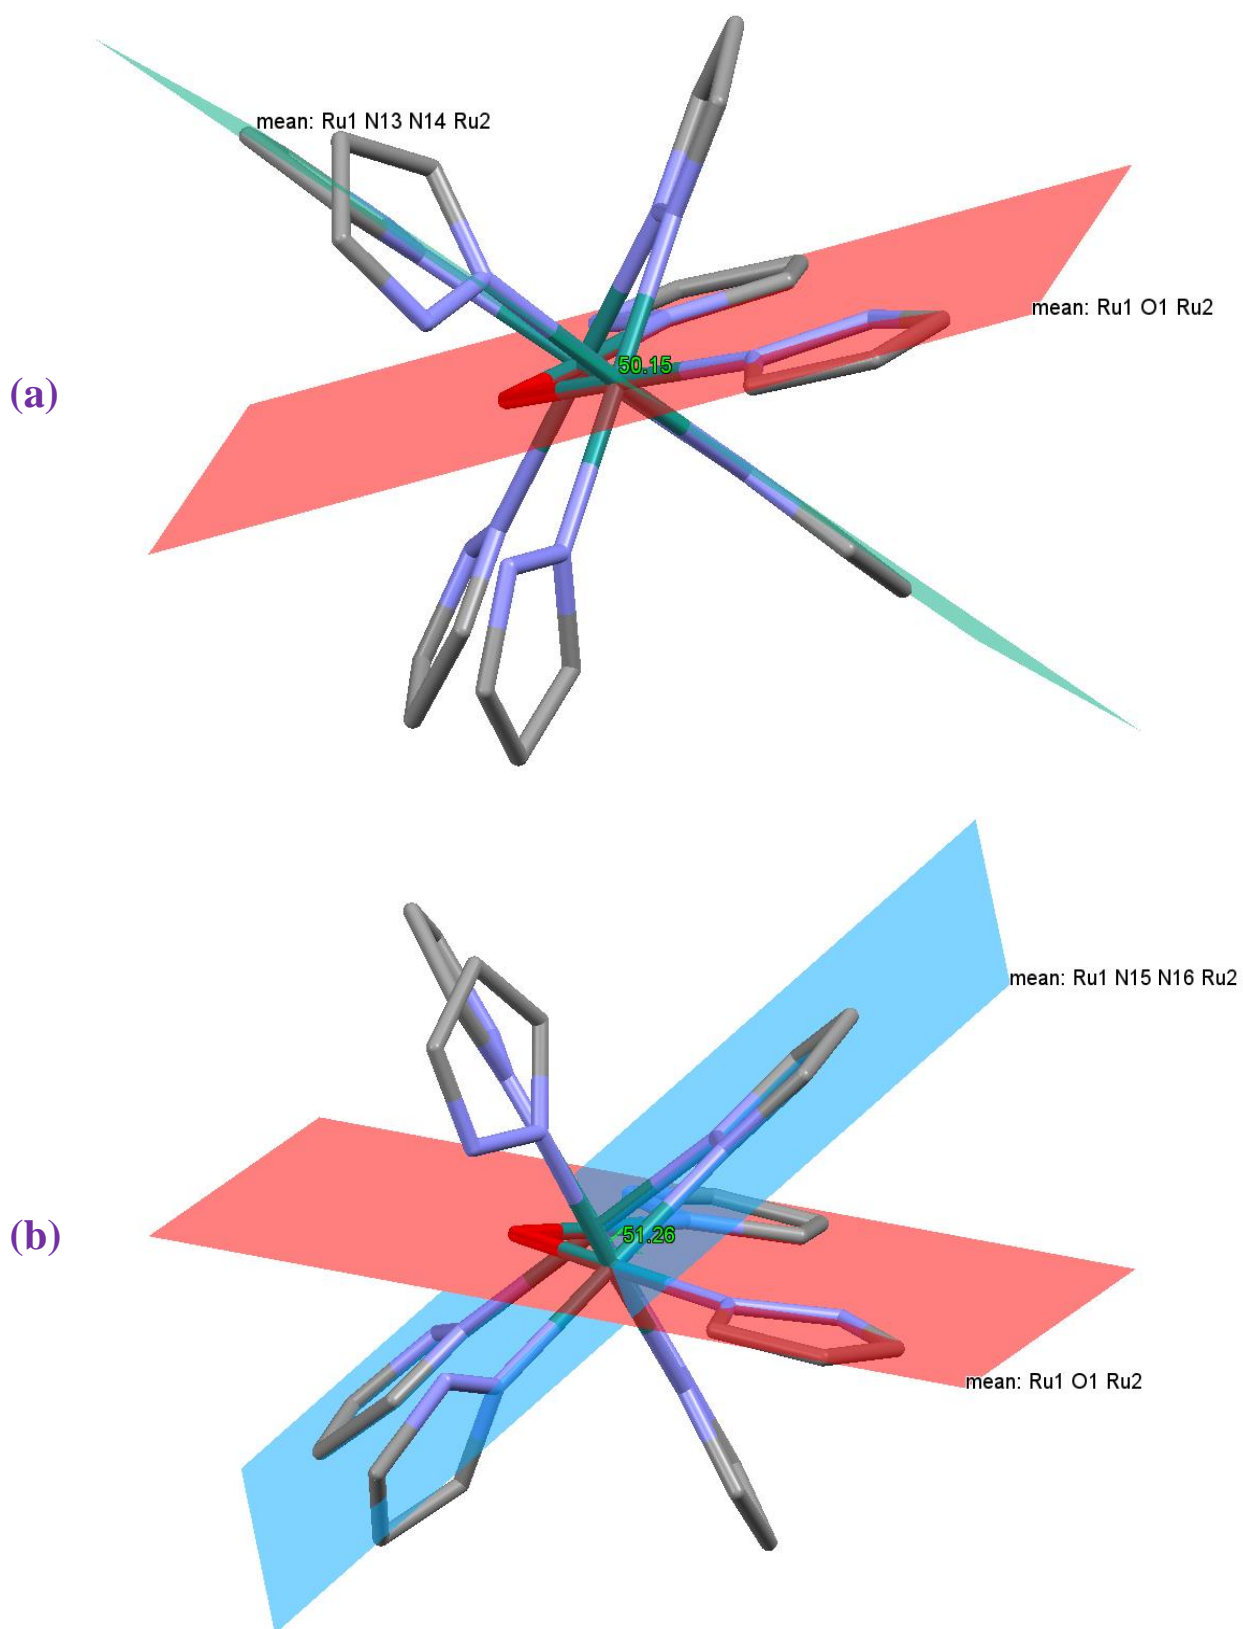

**Fig. S8** Angle between the planes (a) Ru1N13N14Ru2/Ru1O1Ru2 and (b) Ru1N15N16Ru2/Ru1O1Ru2 for **3a**.

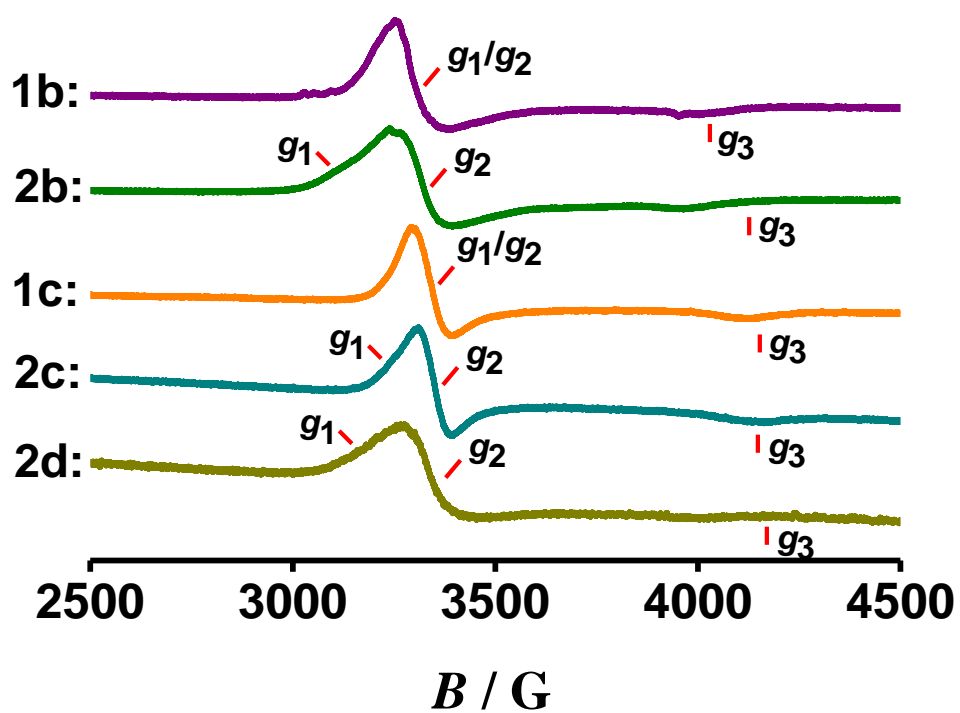

**Fig. S9** X-band EPR spectra of Ru complexes in glassy frozen  $\text{CH}_2\text{Cl}_2$  matrix at 100 K.

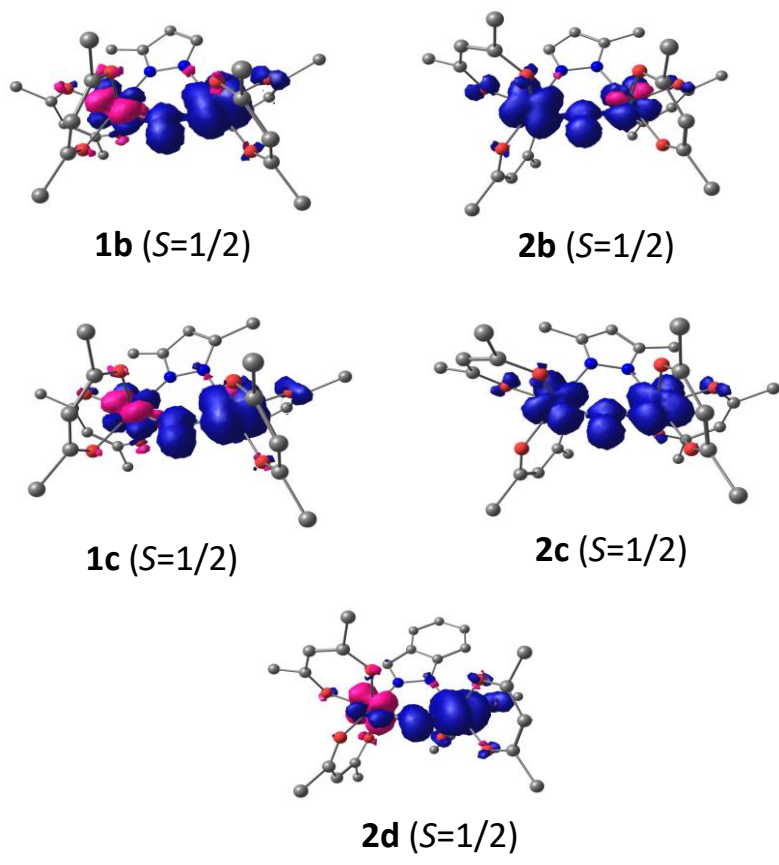

**Fig. S10** Mulliken spin density plots.

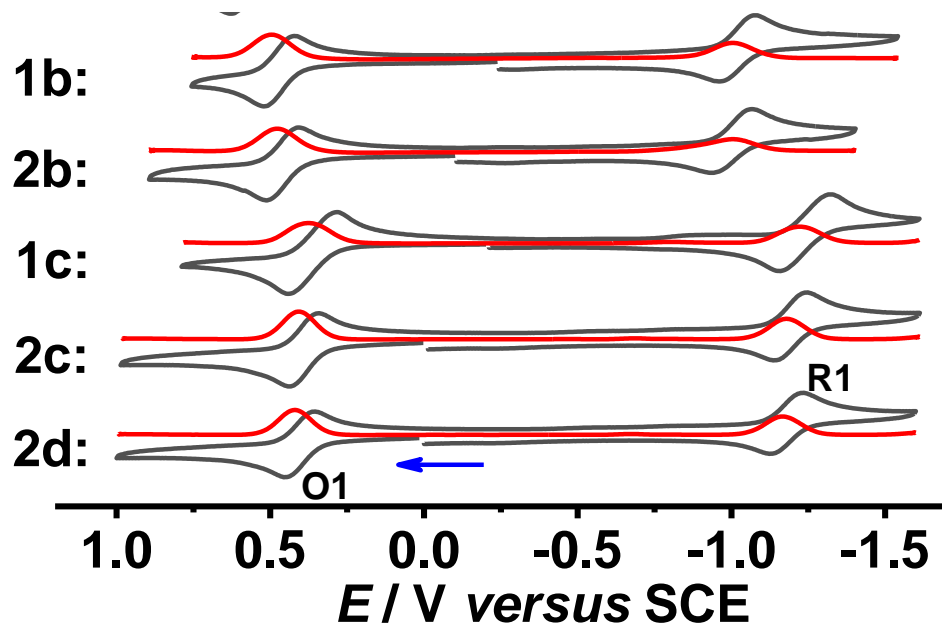

**Fig. S11** Cyclic (black) and differential pulse (red) voltammograms in  $\text{CH}_3\text{CN}/0.1\text{M}$   $\text{Et}_4\text{NClO}_4$ .



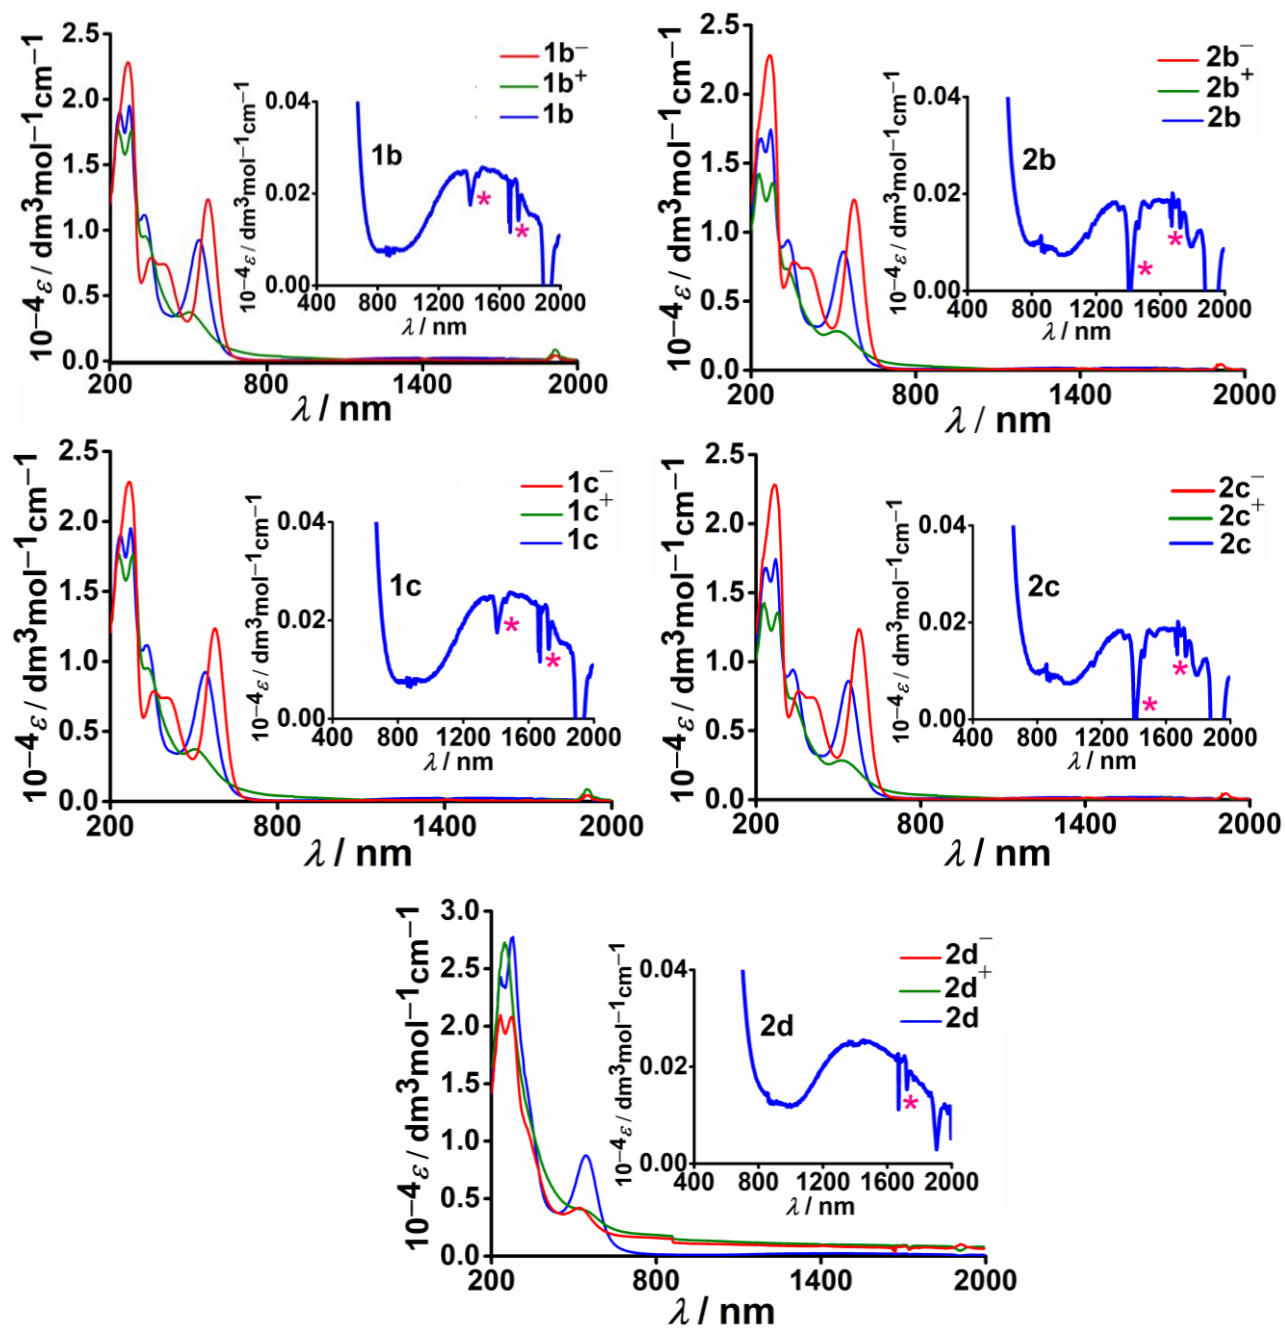

**Fig. S12** Electronic spectra in  $\text{CH}_3\text{CN}$ . \*Instrumental.

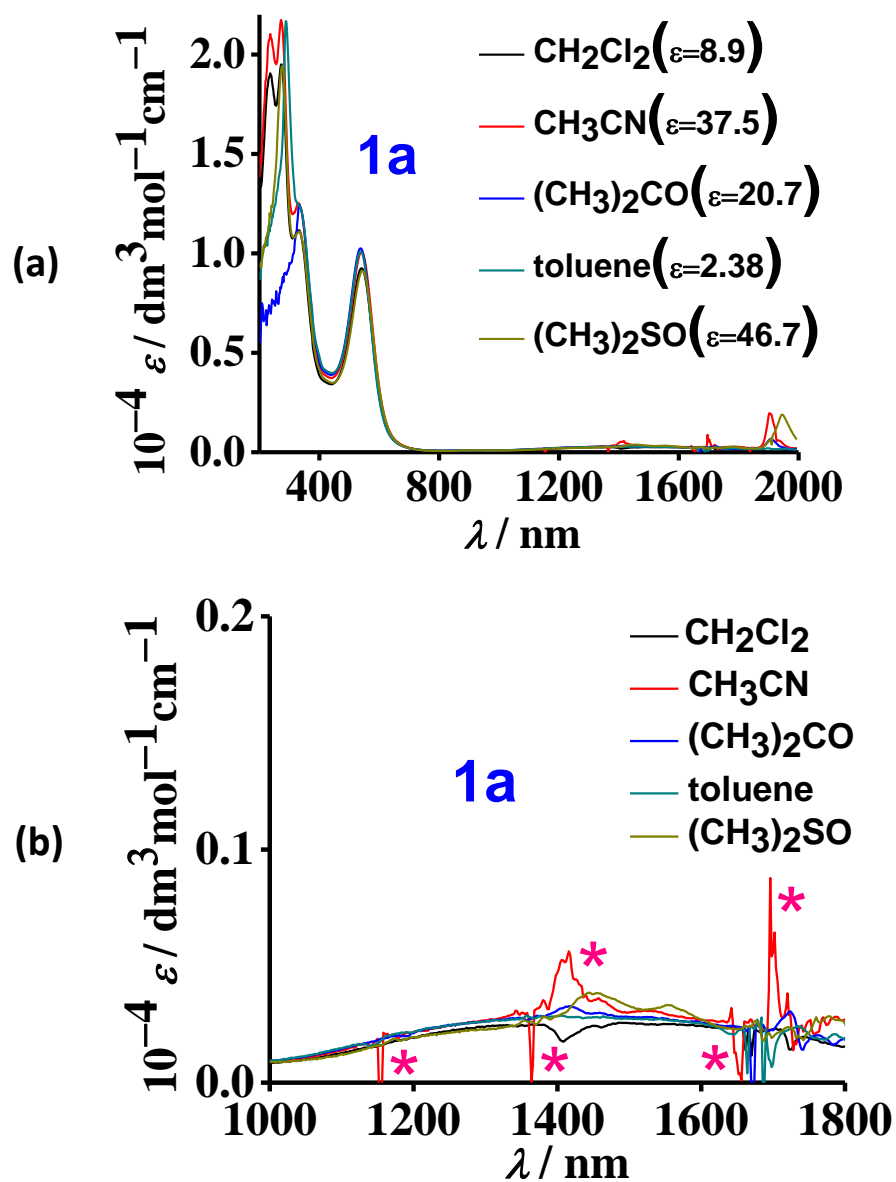

**Fig. S13** Electronic spectral data in different solvents with varying polarity for representative **1a**. (a) 2000-200 nm region and (b) expanded IVCT region. \*Instrumental.

**Table S1** Selected crystallographic parameters

| Complex                                             | <b>1a</b>                                                                     | <b>2a</b>                                                | <b>1b</b>                                                                     | <b>2b</b>                                                                     |
|-----------------------------------------------------|-------------------------------------------------------------------------------|----------------------------------------------------------|-------------------------------------------------------------------------------|-------------------------------------------------------------------------------|
| empirical formula                                   | C <sub>23</sub> H <sub>31</sub> N <sub>2</sub> O <sub>9</sub> Ru <sub>2</sub> | C <sub>11.5</sub> H <sub>15.5</sub> NO <sub>4.5</sub> Ru | C <sub>24</sub> H <sub>33</sub> N <sub>2</sub> O <sub>9</sub> Ru <sub>2</sub> | C <sub>24</sub> H <sub>33</sub> N <sub>2</sub> O <sub>9</sub> Ru <sub>2</sub> |
| formula weight                                      | 681.64                                                                        | 340.82                                                   | 695.66                                                                        | 695.66                                                                        |
| crystal system                                      | monoclinic                                                                    | monoclinic                                               | monoclinic                                                                    | monoclinic                                                                    |
| space group                                         | <i>C12/C1</i>                                                                 | <i>I12/a1</i>                                            | <i>C12/C1</i>                                                                 | <i>C 2/C</i>                                                                  |
| <i>a</i> (Å)                                        | 30.4609(5)                                                                    | 11.5517(3)                                               | 31.0077(16)                                                                   | 16.1406(8)                                                                    |
| <i>b</i> (Å)                                        | 8.14030(10)                                                                   | 16.3753(4)                                               | 8.1608(3)                                                                     | 17.1433(5)                                                                    |
| <i>c</i> (Å)                                        | 23.6002(4)                                                                    | 14.4599(5)                                               | 23.5756(12)                                                                   | 21.2754(10)                                                                   |
| $\alpha$ (deg)                                      | 90                                                                            | 90                                                       | 90                                                                            | 90                                                                            |
| $\beta$ (deg)                                       | 109.249(2)                                                                    | 97.099(3)                                                | 105.161(5)                                                                    | 97.538(14)                                                                    |
| $\gamma$ (deg)                                      | 90                                                                            | 90                                                       | 90                                                                            | 90                                                                            |
| <i>V</i> (Å <sup>3</sup> )                          | 5524.77(16)                                                                   | 2714.32(13)                                              | 5758.1(5)                                                                     | 5836.1(4)                                                                     |
| <i>Z</i>                                            | 8                                                                             | 8                                                        | 8                                                                             | 8                                                                             |
| $\mu$ (mm <sup>-1</sup> )                           | 9.292                                                                         | 1.164                                                    | 1.099                                                                         | 1.084                                                                         |
| <i>T</i> (K)                                        | 150(2)                                                                        | 150(2)                                                   | 150(2)                                                                        | 300(2)                                                                        |
| <i>D</i> <sub>calcd</sub> (g cm <sup>-3</sup> )     | 1.639                                                                         | 1.668                                                    | 1.605                                                                         | 1.583                                                                         |
| <i>F</i> (000)                                      | 2744                                                                          | 1372                                                     | 2808                                                                          | 2808                                                                          |
| $\theta$ range (deg)                                | 3.073 to 64.997                                                               | 2.488 to 25.000                                          | 3.201 to 24.999                                                               | 1.741 to 24.994                                                               |
| data/restraints/<br>parameters                      | 4702 / 0 / 333                                                                | 2334 / 0 / 168                                           | 5024 / 0 / 343                                                                | 5113 / 38 / 397                                                               |
| R1, $wR2$ [ <i>I</i> ><br>2 $\sigma$ ( <i>I</i> )]  | 0.0572, 0.1478                                                                | 0.0200, 0.0492                                           | 0.0318, 0.0808                                                                | 0.1104, 0.2494                                                                |
| R1, $wR2$ (all data)                                | 0.0692, 0.1622                                                                | 0.0242, 0.0502                                           | 0.0366, 0.0836                                                                | 0.1395, 0.2736                                                                |
| GOF                                                 | 1.092                                                                         | 1.090                                                    | 1.055                                                                         |                                                                               |
| largest diff.<br>peak/hole,<br>(e Å <sup>-3</sup> ) | 1.859 / -0.965                                                                | 0.382 / -0.318                                           | 1.416 / -0.420                                                                | 2.400 / -1.753                                                                |

**Table S2** Selected crystallographic parameters

| complex                                                  | <b>1c</b>                                                                     | <b>2c</b>                                                                     | <b>2d</b>                                                                     | <b>3a</b>                                                        |
|----------------------------------------------------------|-------------------------------------------------------------------------------|-------------------------------------------------------------------------------|-------------------------------------------------------------------------------|------------------------------------------------------------------|
| empirical formula                                        | C <sub>25</sub> H <sub>35</sub> N <sub>2</sub> O <sub>9</sub> Ru <sub>2</sub> | C <sub>25</sub> H <sub>35</sub> N <sub>2</sub> O <sub>9</sub> Ru <sub>2</sub> | C <sub>27</sub> H <sub>33</sub> N <sub>2</sub> O <sub>9</sub> Ru <sub>2</sub> | C <sub>24</sub> H <sub>30</sub> N <sub>16</sub> ORu <sub>2</sub> |
| formula weight                                           | 709.69                                                                        | 709.69                                                                        | 731.69                                                                        | 760.78                                                           |
| crystal system                                           | monoclinic                                                                    | triclinic                                                                     | triclinic                                                                     | tetragonal                                                       |
| space group                                              | <i>C12/C1</i>                                                                 | <i>P-1</i>                                                                    | <i>P-1</i>                                                                    | <i>I41cd</i>                                                     |
| <i>a</i> (Å)                                             | 30.8051(7)                                                                    | 10.7709(4)                                                                    | 10.8202(8)                                                                    | 29.6769(4)                                                       |
| <i>b</i> (Å)                                             | 8.1833(2)                                                                     | 11.4776(4)                                                                    | 11.3874(8)                                                                    | 29.6769(4)                                                       |
| <i>c</i> (Å)                                             | 24.0310(6)                                                                    | 13.8804(7)                                                                    | 14.8695(10)                                                                   | 15.2915(4)                                                       |
| $\alpha$ (deg)                                           | 90                                                                            | 99.002(4)                                                                     | 110.833(6)                                                                    | 90                                                               |
| $\beta$ (deg)                                            | 104.800(2)                                                                    | 105.311(4)                                                                    | 96.149(6)                                                                     | 90                                                               |
| $\gamma$ (deg)                                           | 90                                                                            | 107.152(3)                                                                    | 111.215(7)                                                                    | 90                                                               |
| <i>V</i> (Å <sup>3</sup> )                               | 5856.9(2)                                                                     | 1529.46(12)                                                                   | 1536.7(2)                                                                     | 13467.5(5)                                                       |
| <i>Z</i>                                                 | 8                                                                             | 2                                                                             | 2                                                                             | 16                                                               |
| $\mu$ (mm <sup>-1</sup> )                                | 8.790                                                                         | 8.415                                                                         | 1.034                                                                         | 0.941                                                            |
| <i>T</i> (K)                                             | 150(2)                                                                        | 150(2)                                                                        | 150(2)                                                                        | 150(2)                                                           |
| <i>D</i> <sub>calcd</sub> (g cm <sup>-3</sup> )          | 1.610                                                                         | 1.541                                                                         | 1.581                                                                         | 1.501                                                            |
| <i>F</i> (000)                                           | 2872                                                                          | 718                                                                           | 738                                                                           | 6112                                                             |
| $\theta$ range (deg)                                     | 2.967 to 72.931                                                               | 3.413 to 64.982                                                               | 2.016 to 24.997                                                               | 2.170 to 24.999                                                  |
| data/restraints/<br>parameters                           | 4962 / 0 / 353                                                                | 5128 / 0 / 353                                                                | 5405 / 0 / 369                                                                | 5912 / 0 / 388                                                   |
| R1, <i>w</i> R2 [ <i>I</i> ><br>2 $\sigma$ ( <i>I</i> )] | 0.0582, 0.1395                                                                | 0.0672, 0.1075                                                                | 0.0685, 0.1660                                                                | 0.0637, 0.1603                                                   |
| R1, <i>w</i> R2(all data)                                | 0.0677, 0.1535                                                                | 0.0747, 0.1188                                                                | 0.1148, 0.1911                                                                | 0.0752, 0.1745                                                   |
| GOF                                                      | 1.050                                                                         | 1.066                                                                         | 1.036                                                                         |                                                                  |
| largest diff.<br>peak/hole,<br>(e<br>Å <sup>-3</sup> )   | 1.317 / -0.881                                                                | 1.431 / -0.677                                                                | 1.435 / -0.840                                                                | 1.259 / -1.391                                                   |

**Table S3** Selected experimental and DFT calculated bond lengths (Å)

| Bond      | <b>1a</b> |                    | <b>2a</b>  |                    | <b>1b</b> |                    | <b>2b</b> |                    |
|-----------|-----------|--------------------|------------|--------------------|-----------|--------------------|-----------|--------------------|
|           | X-ray     | DFT<br>( $S=1/2$ ) | X-ray      | DFT<br>( $S=1/2$ ) | X-ray     | DFT<br>( $S=1/2$ ) | X-ray     | DFT<br>( $S=1/2$ ) |
| Ru1-O1    | 1.848(4)  | 1.852              | 1.8430(8)  | 1.850              | 1.880(2)  | 1.892              | 1.825(9)  | 1.846              |
| Ru1-O2    | 2.018(4)  | 2.021              | 2.0197(15) | 2.032              | 2.009(2)  | 2.023              | 2.003(9)  | 2.043              |
| Ru1-O3    | 2.057(4)  | 2.076              | 2.0127(14) | 2.030              | 2.036(2)  | 2.050              | 2.058(11) | 2.002              |
| Ru1-O4    | 2.024(4)  | 2.034              | 2.0488(14) | 2.056              | 2.017(3)  | 2.009              | 2.009(11) | 2.054              |
| Ru1-O5    | 2.025(4)  | 2.012              | 2.0137(15) | 2.022              | 2.006(2)  | 2.019              | 2.031(9)  | 2.041              |
| Ru1-N1    | 2.047(5)  | 2.074              | 2.0288(16) | 2.041              | 2.044(3)  | 2.065              | 2.21(3)   | 2.330              |
| Ru2-O1    | 1.842(4)  | 1.855              | –          | –                  | 1.885(2)  | 1.870              | 1.834(9)  | 1.843              |
| Ru2-O6    | 2.012(4)  | 2.030              | –          | –                  | 2.006(2)  | 2.013              | 2.007(8)  | 2.011              |
| Ru2-O7    | 2.046(4)  | 2.078              | –          | –                  | 2.042(2)  | 2.051              | 2.040(10) | 2.074              |
| Ru2-O8    | 2.039(5)  | 2.029              | –          | –                  | 2.015(2)  | 2.026              | 2.036(11) | 2.029              |
| Ru2-O9    | 2.015(4)  | 2.011              | –          | –                  | 2.020(2)  | 2.020              | 2.010(9)  | 2.013              |
| Ru2-N2    | 2.044(5)  | 2.058              | –          | –                  | 2.059(3)  | 2.055              | 1.88(2)   | 2.018              |
| N1-N2     | 1.359(7)  | 1.355              | 1.369(3)   | 1.353              | 1.373(4)  | 1.360              | 1.43(3)   | 1.361              |
| Ru1---Ru2 | 3.369     | 3.371              | 3.359      | 3.362              | 3.409     | 3.359              | 3.351     | 3.387              |

**Table S4** Selected experimental and DFT calculated bond lengths (Å)

| Bond      | <b>1c</b> |                    | <b>2c</b> |                    | <b>2d</b> |                    |
|-----------|-----------|--------------------|-----------|--------------------|-----------|--------------------|
|           | X-ray     | DFT<br>( $S=1/2$ ) | X-ray     | DFT<br>( $S=1/2$ ) | X-ray     | DFT<br>( $S=1/2$ ) |
| Ru1-O1    | 1.832(4)  | 1.830              | 1.826(4)  | 1.846              | 1.897(5)  | 1.870              |
| Ru1-O2    | 2.018(4)  | 2.031              | 2.019(4)  | 2.032              | 1.998(5)  | 2.003              |
| Ru1-O3    | 2.052(4)  | 2.049              | 2.057(3)  | 2.068              | 2.050(6)  | 2.036              |
| Ru1-O4    | 2.054(4)  | 2.051              | 2.047(4)  | 2.066              | 2.033(6)  | 2.029              |
| Ru1-O5    | 2.016(4)  | 2.025              | 2.028(4)  | 2.040              | 2.032(5)  | 2.043              |
| Ru1-N1    | 2.070(5)  | 2.085              | 2.082(4)  | 2.077              | 2.024(7)  | 2.019              |
| Ru2-O1    | 1.823(4)  | 1.835              | 1.811(4)  | 1.835              | 1.885(5)  | 1.870              |
| Ru2-O6    | 2.024(4)  | 2.022              | 2.033(4)  | 2.049              | 2.021(5)  | 1.025              |
| Ru2-O7    | 2.057(4)  | 2.065              | 2.024(4)  | 2.032              | 2.004(6)  | 2.012              |
| Ru2-O8    | 2.029(5)  | 2.045              | 2.061(4)  | 2.055              | 2.044(6)  | 2.040              |
| Ru2-O9    | 2.038(4)  | 2.056              | 2.003(4)  | 2.016              | 2.013(6)  | 2.031              |
| Ru2-N2    | 2.074(5)  | 2.080              | 2.074(5)  | 2.061              | 2.098(7)  | 2.071              |
| N1-N2     | 1.380(8)  | 1.370              | 1.387(7)  | 1.375              | 1.356(9)  | 1.366              |
| Ru1---Ru2 | 3.373     | 3.382              | 3.371     | 3.379              | 3.404     | 3.359              |

**Table S5** Selected experimental and DFT calculated bond angles (deg)

| Bond       | <b>1a</b>  |                    | <b>2a</b>  |                    | <b>1b</b>  |                    | <b>2b</b> |                    |
|------------|------------|--------------------|------------|--------------------|------------|--------------------|-----------|--------------------|
|            | X-ray      | DFT<br>( $S=1/2$ ) | X-ray      | DFT<br>( $S=1/2$ ) | X-ray      | DFT<br>( $S=1/2$ ) | X-ray     | DFT<br>( $S=1/2$ ) |
| Ru1-O1-Ru2 | 131.9(2)   | 135.45             | 131.36(11) | 133.29             | 129.78(13) | 132.03             | 132.6(5)  | 133.51             |
| O1-Ru1-N1  | 84.24(19)  | 83.02              | 84.89(7)   | 85.98              | 85.02(11)  | 87.15              | 80.4(8)   | 88.35              |
| O1-Ru1-O2  | 93.84(18)  | 90.65              | 92.09(4)   | 95.32              | 91.82(10)  | 92.65              | 92.0(4)   | 95.36              |
| O1-Ru1-O3  | 95.21(18)  | 98.32              | 90.79(6)   | 89.11              | 93.88(10)  | 91.61              | 93.5(4)   | 90.47              |
| O1-Ru1-O4  | 174.98(19) | 176.21             | 175.40(6)  | 177.82             | 178.75(10) | 179.01             | 177.4(4)  | 179.21             |
| O1-Ru1-O5  | 89.91(18)  | 88.78              | 89.09(4)   | 92.41              | 89.86(10)  | 90.44              | 91.9(4)   | 88.71              |
| O2-Ru1-N1  | 86.69(18)  | 89.14              | 90.69(6)   | 90.11              | 89.45(11)  | 88.23              | 88.0(7)   | 89.64              |
| O2-Ru1-O3  | 93.60(18)  | 96.36              | 89.39(6)   | 88.02              | 93.11(10)  | 92.29              | 93.5(4)   | 97.19              |
| O2-Ru1-O4  | 85.86(16)  | 84.11              | 88.23(6)   | 89.68              | 87.32(10)  | 88.32              | 85.7(4)   | 82.32              |
| O2-Ru1-O5  | 176.18(16) | 176.95             | 175.80(5)  | 176.16             | 177.75(10) | 176.95             | 175.9(4)  | 178.59             |
| O3-Ru1-N1  | 179.40(19) | 178.22             | 178.89(6)  | 177.83             | 177.26(10) | 178.10             | 173.8(8)  | 178.67             |
| O3-Ru1-O4  | 89.81(18)  | 90.55              | 89.44(6)   | 90.22              | 87.69(11)  | 87.31              | 87.9(5)   | 90.43              |
| O3-Ru1-O5  | 86.81(18)  | 88.18              | 86.61(6)   | 87.23              | 88.27(10)  | 89.39              | 87.7(4)   | 87.11              |
| O4-Ru1-N1  | 90.73(18)  | 93.63              | 90.79(6)   | 93.09              | 93.42(11)  | 96.28              | 98.3(8)   | 98.56              |
| O4-Ru1-O5  | 90.34(17)  | 92.74              | 93.03(6)   | 91.03              | 90.96(10)  | 89.67              | 90.4(4)   | 93.82              |
| O6-Ru2-N2  | 89.47(18)  | 88.61              | –          | –                  | 86.89(10)  | 87.52              | 88.8(9)   | 90.22              |
| O6-Ru2-O7  | 93.33(17)  | 95.11              | –          | –                  | 93.73(10)  | 94.61              | 92.7(4)   | 91.64              |
| O6-Ru2-O8  | 86.94(18)  | 88.23              | –          | –                  | 86.80(10)  | 87.39              | 87.9(4)   | 88.44              |
| O6-Ru2-O9  | 176.24(17) | 177.72             | –          | –                  | 177.35(10) | 178.55             | 177.0(5)  | 178.02             |
| O7-Ru2-N2  | 176.98(18) | 178.05             | –          | –                  | 177.48(11) | 177.63             | 175.0(9)  | 179.27             |
| O7-Ru2-O8  | 87.59(19)  | 87.21              | –          | –                  | 88.68(10)  | 89.06              | 90.6(4)   | 93.09              |
| O7-Ru2-O9  | 88.78(17)  | 90.22              | –          | –                  | 86.88(10)  | 87.13              | 86.3(4)   | 89.21              |
| O8-Ru2-N2  | 93.70(19)  | 96.88              | –          | –                  | 93.79(11)  | 95.36              | 84.7(10)  | 95.38              |
| O8-Ru2-O9  | 90.04(18)  | 92.63              | –          | –                  | 90.64(10)  | 93.44              | 89.2(4)   | 90.15              |
| Ru1-N1-N2  | 120.0(4)   | 119.27             | 119.27(5)  | 122.39             | 121.1(2)   | 122.52             | 118.6(19) | 123.32             |
| Ru2-N2-N1  | 118.8(4)   | 121.36             | –          | –                  | 118.4(2)   | 117.20             | 117(2)    | 122.07             |

**Table S6** Selected experimental and DFT calculated bond angles (deg)

| Bond       | 1c         |                    | 2c         |                    | 2d       |                    |
|------------|------------|--------------------|------------|--------------------|----------|--------------------|
|            | X-ray      | DFT<br>( $S=1/2$ ) | X-ray      | DFT<br>( $S=1/2$ ) | X-ray    | DFT<br>( $S=1/2$ ) |
| Ru1-O1-Ru2 | 134.7(2)   | 131.20             | 136.0(2)   | 133.71             | 128.4(3) | 128.4(3)           |
| O1-Ru1-N1  | 83.77(19)  | 85.61              | 82.92(17)  | 84.68              | 85.3(3)  | 85.1(3)            |
| O1-Ru1-O2  | 92.45(18)  | 96.33              | 91.97(18)  | 90.84              | 92.7(2)  | 92.9(2)            |
| O1-Ru1-O3  | 94.57(18)  | 92.52              | 90.29(16)  | 93.70              | 91.2(2)  | 91.2(2)            |
| O1-Ru1-O4  | 179.02(18) | 178.55             | 174.75(15) | 175.10             | 176.6(2) | 176.6(2)           |
| O1-Ru1-O5  | 90.87(18)  | 93.65              | 92.20(17)  | 93.12              | 93.5(2)  | 93.4(2)            |
| O2-Ru1-N1  | 88.99(18)  | 88.17              | 88.80(16)  | 90.30              | 87.4(2)  | 87.5(3)            |
| O2-Ru1-O3  | 93.59(18)  | 95.35              | 93.54(15)  | 95.05              | 94.1(2)  | 94.0(3)            |
| O2-Ru1-O4  | 87.26(18)  | 90.11              | 87.29(17)  | 88.67              | 84.0(2)  | 83.8(2)            |
| O2-Ru1-O5  | 176.32(17) | 179.41             | 175.33(16) | 177.34             | 172.6(2) | 172.7(2)           |
| O3-Ru1-N1  | 176.99(19) | 177.28             | 172.90(17) | 175.51             | 176.3(2) | 176.1(2)           |
| O3-Ru1-O4  | 84.51(18)  | 85.38              | 84.57(16)  | 86.27              | 88.2(2)  | 88.1(2)            |
| O3-Ru1-O5  | 87.75(18)  | 84.58              | 88.54(16)  | 87.69              | 89.9(2)  | 89.7(2)            |
| O4-Ru1-N1  | 97.16(19)  | 94.64              | 102.25(17) | 105.13             | 95.3(3)  | 95.6(3)            |
| O4-Ru1-O5  | 89.45(18)  | 90.36              | 88.84(17)  | 90.21              | 89.9(2)  | 90.0(2)            |
| O6-Ru2-N2  | 86.69(18)  | 88.29              | 88.74(17)  | 89.82              | 91.7(2)  | 91.7(2)            |
| O6-Ru2-O7  | 94.30(17)  | 96.21              | 89.99(16)  | 93.19              | 89.4(2)  | 89.3(2)            |
| O6-Ru2-O8  | 84.30(17)  | 90.89              | 88.70(15)  | 87.04              | 85.4(2)  | 85.4(2)            |
| O6-Ru2-O9  | 175.20(17) | 176.12             | 172.83(15) | 175.80             | 173.2(2) | 173.1(2)           |
| O7-Ru2-N2  | 177.1(2)   | 176.06             | 176.04(17) | 177.10             | 97.3(3)  | 97.2(3)            |
| O7-Ru2-O8  | 86.64(18)  | 89.36              | 85.98(16)  | 88.00              | 88.0(2)  | 87.8(2)            |
| O7-Ru2-O9  | 86.66(17)  | 88.49              | 83.75(16)  | 84.41              | 83.8(2)  | 83.8(2)            |
| O8-Ru2-N2  | 96.13(19)  | 94.93              | 176.10(15) | 177.32             | 174.0(3) | 174.2(2)           |
| O8-Ru2-O9  | 90.06(17)  | 92.66              | 94.32(15)  | 93.62              | 93.4(2)  | 93.4(2)            |
| Ru1-N1-N2  | 119.1(4)   | 119.37             | 119.2(3)   | 122.40             | 120.8(5) | 121.0(5)           |
| Ru2-N2-N1  | 118.4(4)   | 120.27             | 117.7(3)   | 119.08             | 119.4(5) | 119.2(5)           |



**Table S7** Selected experimental and DFT calculated bond lengths (Å)

| Bond      | <b>3a</b> |                    |
|-----------|-----------|--------------------|
|           | X-ray     | DFT ( <i>S</i> =0) |
| Ru1-O1    | 1.900(8)  | 1.915              |
| Ru1-N1    | 2.129(9)  | 2.118              |
| Ru1-N3    | 2.123(10) | 2.117              |
| Ru1-N5    | 2.094(9)  | 2.099              |
| Ru1-N13   | 2.048(9)  | 2.120              |
| Ru1-N15   | 2.013(9)  | 2.075              |
| Ru2-O1    | 1.893(8)  | 1.912              |
| Ru2-N7    | 2.077(9)  | 2.096              |
| Ru2-N9    | 2.126(10) | 2.113              |
| Ru2-N11   | 2.094(10) | 2.109              |
| Ru2-N14   | 2.047(10) | 2.126              |
| Ru2-N16   | 2.057(10) | 2.082              |
| N1-N2     | 1.351(13) | 1.359              |
| N3-N4     | 1.405(15) | 1.350              |
| N5-N6     | 1.365(13) | 1.357              |
| N7-N8     | 1.358(14) | 1.360              |
| N9-N10    | 1.353(14) | 1.354              |
| N11-N12   | 1.346(13) | 1.351              |
| N13-N14   | 1.349(14) | 1.353              |
| N15-N16   | 1.352(14) | 1.360              |
| Ru1---Ru2 | 3.185     | 3.210              |

**Table S8** Selected experimental and DFT calculated bond angles (deg)

| Bond        | <b>3a</b> |                    |
|-------------|-----------|--------------------|
|             | X-ray     | DFT ( <i>S</i> =0) |
| Ru1-O1-Ru2  | 114.2(4)  | 106.86             |
| N1-Ru1-N3   | 91.1(4)   | 95.45              |
| N1-Ru1-N5   | 91.4(4)   | 93.11              |
| N1-Ru1-N13  | 91.4(4)   | 92.65              |
| N1-Ru1-N15  | 175.5(3)  | 177.21             |
| N3-Ru1-N5   | 91.1(4)   | 89.68              |
| N3-Ru1-N13  | 94.2(4)   | 90.05              |
| N3-Ru1-N15  | 93.0(4)   | 96.39              |
| N13-Ru1-N15 | 87.1(4)   | 88.25              |
| N7-Ru2-N9   | 89.6(4)   | 88.31              |
| N7-Ru2-N11  | 92.6(4)   | 92.93              |
| N7-Ru2-N14  | 90.4(4)   | 89.49              |
| N7-Ru2-N16  | 177.7(3)  | 178.22             |
| N9-Ru2-N11  | 91.0(4)   | 89.69              |
| N9-Ru2-N14  | 90.6(4)   | 93.03              |
| N9-Ru2-N16  | 92.1(4)   | 90.27              |
| N14-Ru2-N16 | 88.0(4)   | 89.57              |
| Ru1-N13-N14 | 115.5(6)  | 119.31             |
| Ru1-N15-N16 | 118.0(7)  | 120.04             |
| Ru2-N14-N13 | 117.7(7)  | 121.55             |
| Ru2-N16-N15 | 115.5(6)  | 118.85             |

**Table S9** Hydrogen bonding distances in Å

| N-H...N (Å)   | <b>3a</b> |
|---------------|-----------|
| N2-H2...N4    | 2.20      |
| N6-H6...N4    | 2.37      |
| N12-H12...N10 | 2.02      |
| N8-H8...N10   | 2.11      |

**Table S10** Angle (deg) between the planes for **3a**

| Complex   | Planes                | Angle (deg) between the planes |
|-----------|-----------------------|--------------------------------|
| <b>3a</b> | Ru1N13N14Ru2/Ru1O1Ru2 | 50.15                          |
| <b>3a</b> | Ru1N15N16Ru2/Ru1O1Ru2 | 51.26                          |

**Table S11** Energies of DFT (M06L/LanL2DZ/6-31G\*) optimised structures

| Complex               | <i>E</i> (Hartrees) |              |              |                |                | $\Delta E$                                       |
|-----------------------|---------------------|--------------|--------------|----------------|----------------|--------------------------------------------------|
|                       | <i>S</i> = 0        | <i>S</i> = 1 | <i>S</i> = 2 | <i>S</i> = 3/2 | <i>S</i> = 1/2 |                                                  |
| <b>1a</b>             | –                   | –            |              | -<br>1869.4355 | -1869.44395    | 0.00837 Hartrees<br>1837.0027 cm <sup>-1</sup>   |
| <b>1a<sup>+</sup></b> | -1869.2239          | -1869.2201   | -1869.2199   | –              | –              | 0.00373 Hartrees<br>818.64037 cm <sup>-1</sup>   |
| <b>1a<sup>-</sup></b> | -1869.5271          | -1869.5089   |              | –              | –              | 0.01818 Hartrees<br>3990.0488 cm <sup>-1</sup>   |
| <b>2a</b>             | –                   | –            |              | -<br>1869.4294 | -1869.43764    | 0.00819 Hartrees<br>1797.4972 cm <sup>-1</sup>   |
| <b>2a<sup>+</sup></b> | -1869.2249          | -1869.2212   | -1869.2206   | –              | –              | 0.00368 Hartrees<br>807.6666 cm <sup>-1</sup>    |
| <b>2a<sup>-</sup></b> | -1869.52912         | -1869.5107   | –            | –              | –              | 0.01834 Hartrees<br>4025.1647 cm <sup>-1</sup>   |
| <b>1b</b>             | –                   | –            | –            | -<br>1908.8037 | -1908.81187    | 0.00814 Hartrees<br>1786.5235 cm <sup>-1</sup>   |
| <b>1b<sup>+</sup></b> | -1908.5972          | -1908.5936   | -1908.5929   | –              | –              | 0.00353 Hartrees<br>774.74544 cm <sup>-1</sup>   |
| <b>1b<sup>-</sup></b> | -1908.8885          | -1908.8705   | –            | –              | –              | 0.018056 Hartrees<br>3962.83392 cm <sup>-1</sup> |
| <b>2b</b>             | –                   | –            | –            | -<br>1908.8039 | -1908.81211    | 0.00820 Hartrees<br>1799.6200 cm <sup>-1</sup>   |
| <b>2b<sup>+</sup></b> | -1908.6005          | -1908.5968   | -1908.5961   | –              | –              | 0.00365 Hartrees<br>801.0824 cm <sup>-1</sup>    |
| <b>2b<sup>-</sup></b> | -1908.8886          | -1908.8704   | –            | –              | –              | 0.018111 Hartrees<br>3974.90502 cm <sup>-1</sup> |
| <b>1c</b>             | –                   | –            | –            | -<br>1948.0546 | -1948.06295    | 0.00828 Hartrees<br>1817.2499 cm <sup>-1</sup>   |
| <b>1c<sup>+</sup></b> | -1947.9136          | -1947.9099   | -1947.9069   | –              | –              | 0.00378 Hartrees<br>829.6141 cm <sup>-1</sup>    |
| <b>1c<sup>-</sup></b> | -1948.1408          | -1948.1225   | –            | –              | –              | 0.018310 Hartrees<br>4018.58048 cm <sup>-1</sup> |
| <b>2c</b>             | –                   | –            | –            | -<br>1948.0547 | -1948.06277    | 0.00801 Hartrees<br>1759.30863 cm <sup>-1</sup>  |
| <b>2c<sup>+</sup></b> | -1947.91514         | -1947.91155  | -1947.91125  | –              | –              | 0.00359 Hartrees<br>787.91392 cm <sup>-1</sup>   |
| <b>2c<sup>-</sup></b> | -1948.20606         | -1948.18773  | –            | –              | –              | 0.018321 Hartrees<br>4020.9947 cm <sup>-1</sup>  |
| <b>2d</b>             | –                   | –            | –            | -<br>2023.0535 | -2023.0619     | 0.00841 Hartrees<br>1845.7816 cm <sup>-1</sup>   |
| <b>2d<sup>+</sup></b> | -2022.91288         | -2022.90949  | -2022.90921  | –              | –              | 0.00339 Hartrees<br>744.0190 cm <sup>-1</sup>    |
| <b>2d<sup>-</sup></b> | -2023.14589         | -2023.12766  | –            | –              | –              | 0.018222 Hartrees<br>3999.26671 cm <sup>-1</sup> |

**Table S12** DFT calculated selected MO compositions (M06L/LanL2DZ/6-31G\*)

| Complex                                | MO                    | Fragments                              | % Contribution       |
|----------------------------------------|-----------------------|----------------------------------------|----------------------|
| <b>1a<sup>+</sup></b> ( <i>S</i> =0)   | LUMO                  | Ru/acac/ $\mu$ -O                      | 63/21/15             |
| <b>1a</b> ( <i>S</i> =1/2)             | SOMO<br>$\beta$ -LUMO | Ru/acac/ $\mu$ -O<br>Ru/ $\mu$ -O/acac | 65/19/14<br>66/17/16 |
| <b>1a<sup>-</sup></b> ( <i>S</i> =0)   | HOMO                  | Ru/ $\mu$ -O/acac                      | 63/18/18             |
| <b>2a<sup>+</sup></b> ( <i>S</i> =0)   | LUMO                  | Ru/acac/ $\mu$ -O                      | 65/20/13             |
| <b>2a</b> ( <i>S</i> =1/2)             | SOMO<br>$\beta$ -LUMO | Ru/acac/ $\mu$ -O<br>Ru/ $\mu$ -O/acac | 62/20/16<br>65/18/16 |
| <b>2a<sup>-</sup></b> ( <i>S</i> =0)   | HOMO                  | Ru/ $\mu$ -O/acac                      | 66/20/17             |
| <b>1b<sup>+</sup></b> ( <i>S</i> =0)   | LUMO                  | Ru/acac/ $\mu$ -O                      | 68/18/14             |
| <b>1b</b> ( <i>S</i> =1/2)             | SOMO<br>$\beta$ -LUMO | Ru/acac/ $\mu$ -O<br>Ru/ $\mu$ -O/acac | 66/21/12<br>61/19/17 |
| <b>1b<sup>-</sup></b> ( <i>S</i> =0)   | HOMO                  | Ru/ $\mu$ -O/acac                      | 69/19/12             |
| <b>2b<sup>+</sup></b> ( <i>S</i> =0)   | LUMO                  | Ru/acac/ $\mu$ -O                      | 64/24/14             |
| <b>2b</b> ( <i>S</i> =1/2)             | SOMO<br>$\beta$ -LUMO | Ru/acac/ $\mu$ -O<br>Ru/ $\mu$ -O/acac | 65/18/13<br>67/17/16 |
| <b>2b<sup>-</sup></b> ( <i>S</i> =0)   | HOMO                  | Ru/ $\mu$ -O/acac                      | 69/18/15             |
| <b>1c<sup>+</sup></b> ( <i>S</i> =0)   | LUMO                  | Ru/acac/ $\mu$ -O                      | 63/21/15             |
| <b>1c</b> ( <i>S</i> =1/2)             | SOMO<br>$\beta$ -LUMO | Ru/acac/ $\mu$ -O<br>Ru/ $\mu$ -O/acac | 65/19/14<br>66/18/15 |
| <b>1c<sup>-</sup></b> ( <i>S</i> =0)   | HOMO                  | Ru/ $\mu$ -O/acac                      | 63/19/18             |
| <b>2c<sup>+</sup></b> ( <i>S</i> =0)   | LUMO                  | Ru/acac/ $\mu$ -O                      | 68/21/15             |
| <b>2c</b> ( <i>S</i> =1/2)             | SOMO<br>$\beta$ -LUMO | Ru/acac/ $\mu$ -O<br>Ru/ $\mu$ -O/acac | 65/17/14<br>68/19/16 |
| <b>2c<sup>-</sup></b> ( <i>S</i> =0)   | HOMO                  | Ru/ $\mu$ -O/acac                      | 62/21/14             |
| <b>2d<sup>+</sup></b> ( <i>S</i> =0)   | LUMO                  | Ru/acac/ $\mu$ -O                      | 62/20/14             |
| <b>2d</b> ( <i>S</i> =1/2)             | SOMO<br>$\beta$ -LUMO | Ru/acac/ $\mu$ -O<br>Ru/ $\mu$ -O/acac | 62/21/16<br>66/19/13 |
| <b>2d<sup>-</sup></b> ( <i>S</i> =0)   | HOMO                  | Ru/ $\mu$ -O/acac                      | 61/21/119            |
| <b>3a<sup>+</sup></b> ( <i>S</i> =1/2) | $\beta$ -LUMO         | Ru/ $\mu$ -O/Pz-H                      | 68/14/14             |
| <b>3a</b> ( <i>S</i> =0)               | HOMO<br>LUMO          | Ru/ $\mu$ -O/Pz-H<br>Pz-H/Ru/ $\mu$ -O | 69/26/05<br>89/08/02 |
| <b>3a<sup>-</sup></b> ( <i>S</i> =1/2) | SOMO                  | Pz-H/Ru/ $\mu$ -Pz                     | 80/19/01             |

**Table S13** DFT calculated selected MO compositions for **1a** in  $S = 1/2$  state

| MO           | Energy (eV) | % Composition |      |          |    |
|--------------|-------------|---------------|------|----------|----|
|              |             | Ru            | acac | $\mu$ -O | Pz |
| $\alpha$ -MO |             |               |      |          |    |
| LUMO+5       | -0.888      | 55            | 39   | 04       | 01 |
| LUMO+4       | -1.138      | 06            | 94   | 00       | 00 |
| LUMO+3       | -1.196      | 03            | 96   | 00       | 01 |
| LUMO+2       | -1.229      | 08            | 91   | 00       | 01 |
| LUMO+1       | -1.256      | 12            | 85   | 02       | 01 |
| LUMO         | -3.442      | 65            | 15   | 20       | 00 |
| SOMO         | -4.063      | 65            | 19   | 14       | 02 |
| HOMO-1       | -4.166      | 66            | 17   | 02       | 14 |
| HOMO-2       | -4.245      | 63            | 21   | 00       | 16 |
| HOMO-3       | -4.556      | 58            | 41   | 00       | 01 |
| HOMO-4       | -4.945      | 66            | 30   | 00       | 04 |
| HOMO-5       | -5.313      | 02            | 67   | 00       | 31 |
| $\beta$ -MO  |             |               |      |          |    |
| LUMO+5       | -1.096      | 07            | 92   | 00       | 00 |
| LUMO+4       | -1.165      | 08            | 90   | 00       | 01 |
| LUMO+3       | -1.178      | 05            | 94   | 00       | 01 |
| LUMO+2       | -1.223      | 06            | 92   | 01       | 01 |
| LUMO+1       | -3.192      | 65            | 14   | 21       | 00 |
| LUMO         | -3.393      | 66            | 16   | 17       | 01 |
| HOMO         | -4.032      | 68            | 17   | 01       | 15 |
| HOMO-1       | -4.063      | 66            | 22   | 00       | 12 |
| HOMO-2       | -4.399      | 64            | 34   | 00       | 02 |
| HOMO-3       | -4.560      | 77            | 19   | 00       | 03 |
| HOMO-4       | -5.295      | 01            | 65   | 00       | 33 |
| HOMO-5       | -5.412      | 07            | 85   | 01       | 07 |

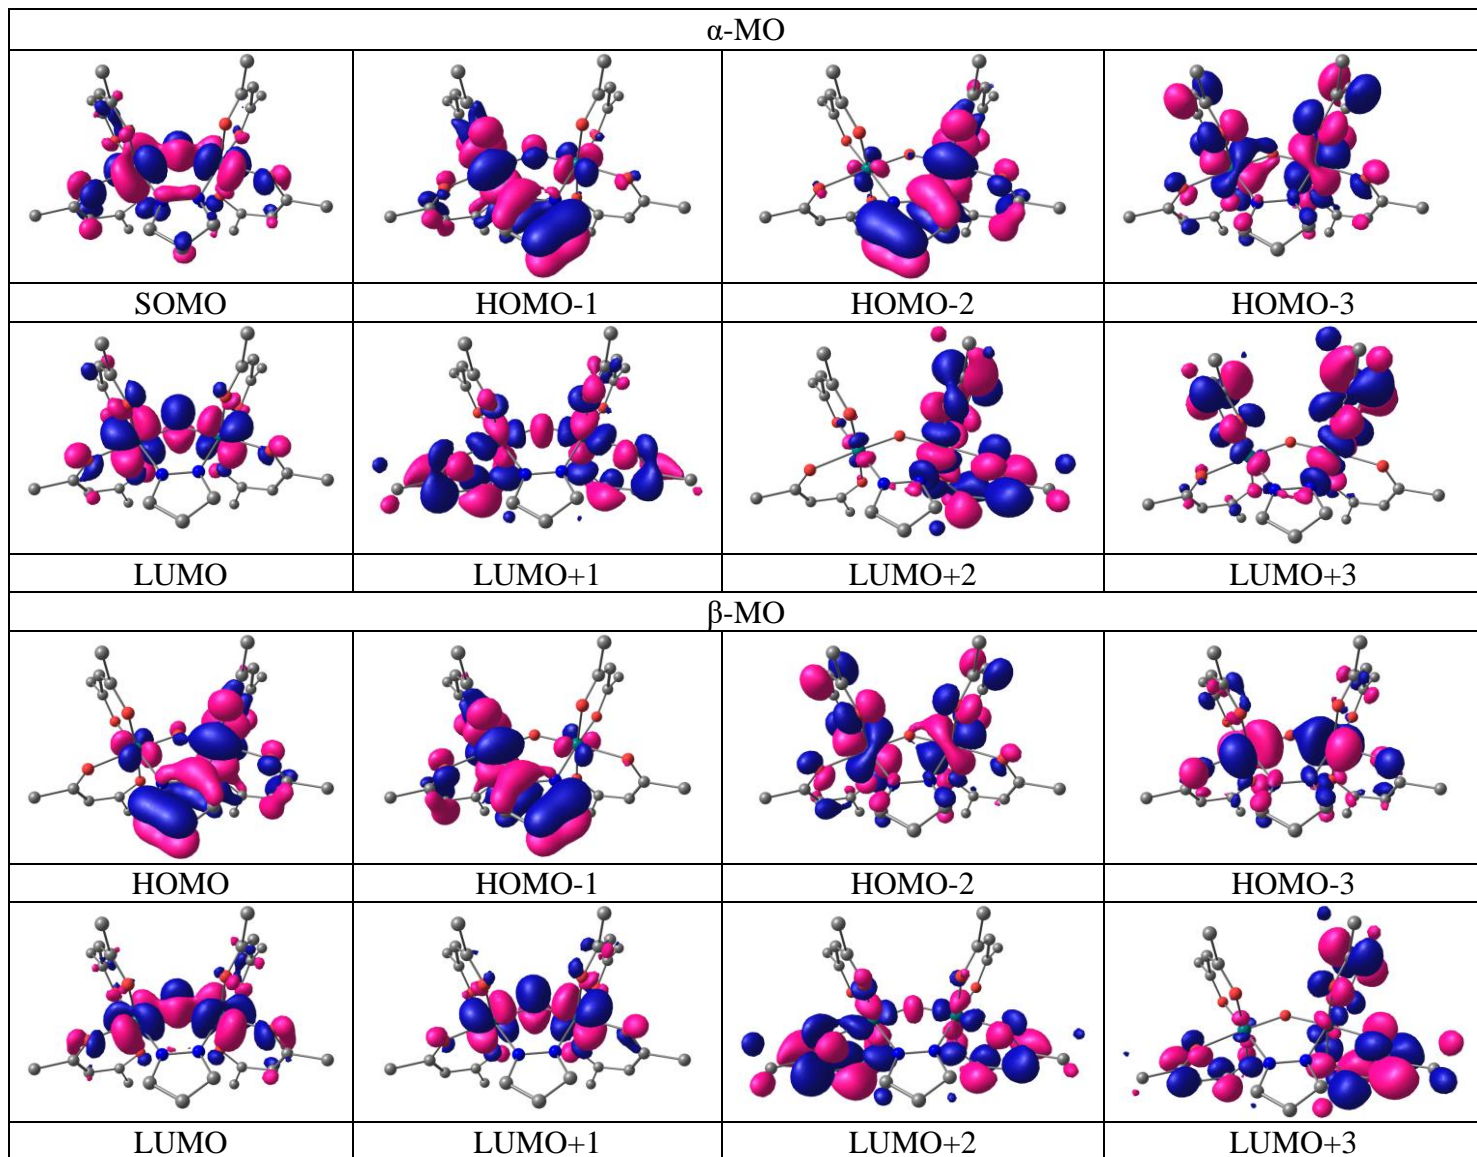



**Table S14** DFT calculated selected MO compositions for **1a<sup>+</sup>** in  $S = 0$  state

| MO     | Energy (eV) | % Composition |      |          |    |
|--------|-------------|---------------|------|----------|----|
|        |             | Ru            | acac | $\mu$ -O | Pz |
| LUMO+5 | -4.430      | 17            | 79   | 01       | 02 |
| LUMO+4 | -4.515      | 10            | 87   | 00       | 02 |
| LUMO+3 | -4.552      | 10            | 87   | 00       | 02 |
| LUMO+2 | -4.754      | 52            | 35   | 10       | 03 |
| LUMO+1 | -7.191      | 64            | 17   | 19       | 00 |
| LUMO   | -7.677      | 63            | 21   | 15       | 02 |
| HOMO   | -7.755      | 59            | 16   | 02       | 23 |
| HOMO-1 | -7.825      | 57            | 23   | 00       | 19 |
| HOMO-2 | -8.059      | 41            | 57   | 00       | 01 |
| HOMO-3 | -8.519      | 44            | 46   | 00       | 10 |
| HOMO-4 | -8.578      | 05            | 76   | 01       | 18 |
| HOMO-5 | -8.733      | 16            | 63   | 06       | 14 |

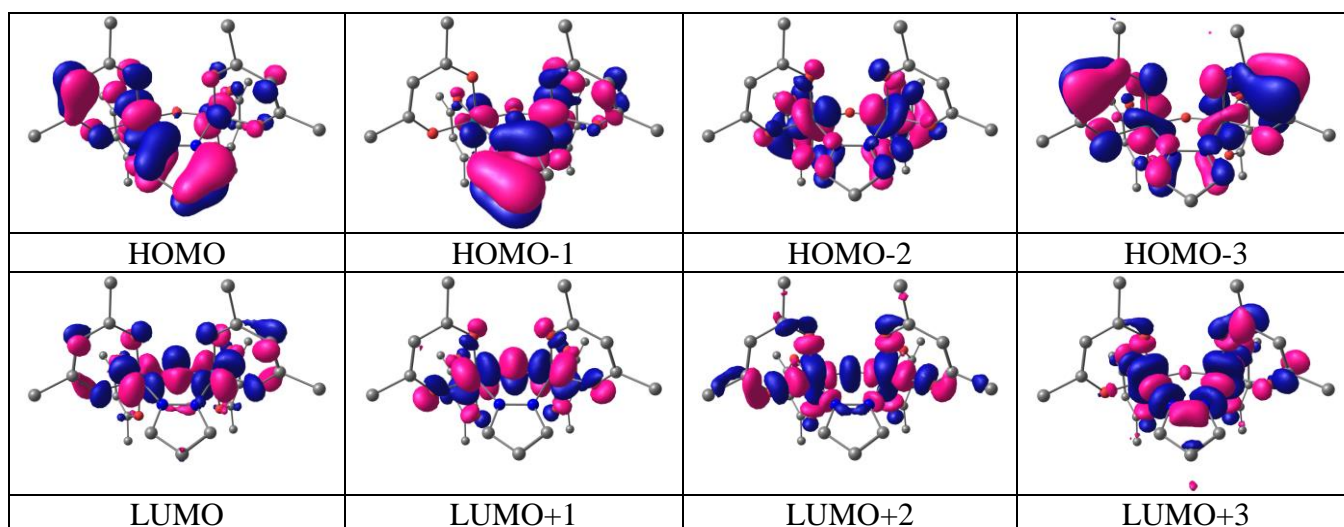

**Table S15** DFT calculated selected MO compositions for **1a<sup>-</sup>** in  $S = 0$  state

| MO     | Energy (eV) | % Composition |      |          |    |
|--------|-------------|---------------|------|----------|----|
|        |             | Ru            | acac | $\mu$ -O | Pz |
| LUMO+5 | 3.035       | 56            | 38   | 01       | 04 |
| LUMO+4 | 2.169       | 10            | 89   | 00       | 01 |
| LUMO+3 | 2.114       | 11            | 88   | 00       | 01 |
| LUMO+2 | 2.074       | 05            | 94   | 00       | 01 |
| LUMO+1 | 2.007       | 06            | 93   | 00       | 01 |
| LUMO   | 0.707       | 63            | 15   | 15       | 00 |
| HOMO   | 0.335       | 63            | 18   | 18       | 01 |
| HOMO-1 | -0.352      | 72            | 18   | 00       | 10 |
| HOMO-2 | -0.409      | 71            | 20   | 00       | 09 |
| HOMO-3 | -0.684      | 73            | 26   | 00       | 02 |
| HOMO-4 | -0.813      | 79            | 18   | 00       | 03 |
| HOMO-5 | -2.086      | 01            | 68   | 00       | 30 |

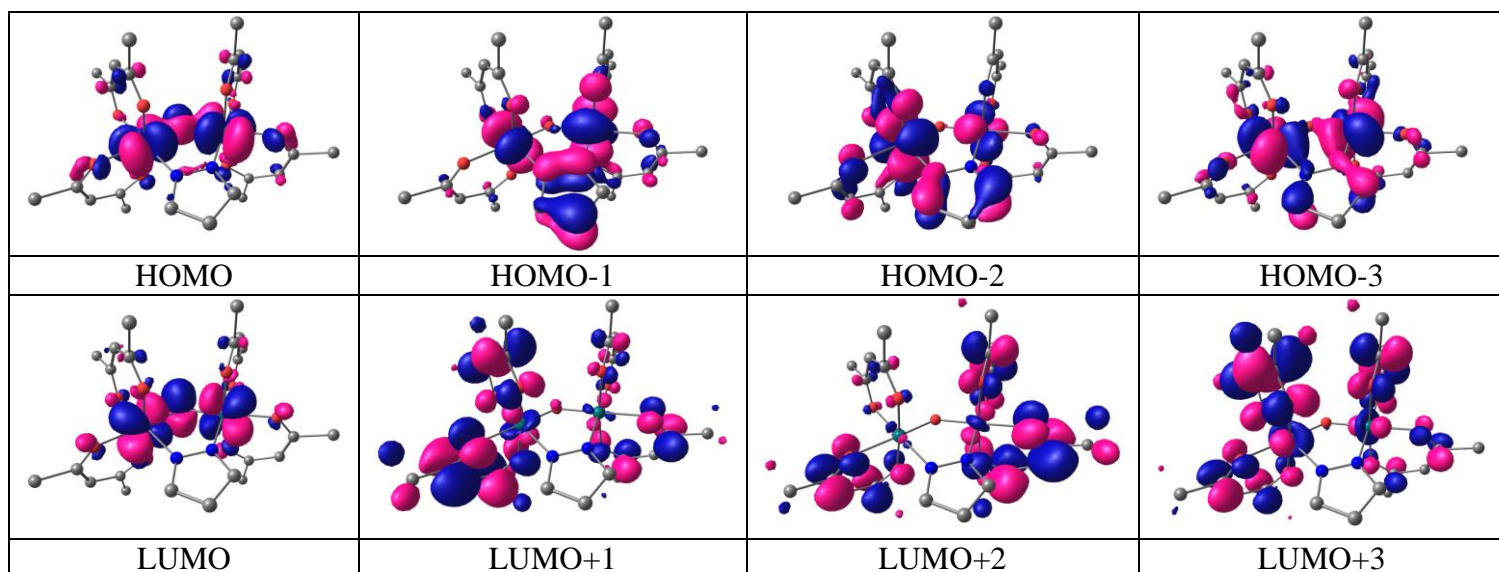

**Table S16.** DFT calculated selected MO compositions for **2a** in  $S = 1/2$  state

| MO           | Energy (eV) | % Composition |      |          |    |
|--------------|-------------|---------------|------|----------|----|
|              |             | Ru            | acac | $\mu$ -O | Pz |
| $\alpha$ -MO |             |               |      |          |    |
| LUMO+5       | -0.863      | 58            | 36   | 06       | 00 |
| LUMO+4       | -1.119      | 06            | 93   | 00       | 00 |
| LUMO+3       | -1.134      | 05            | 94   | 00       | 01 |
| LUMO+2       | -1.265      | 05            | 94   | 00       | 01 |
| LUMO+1       | -1.289      | 04            | 95   | 00       | 00 |
| LUMO         | -3.393      | 64            | 15   | 21       | 00 |
| SOMO         | -3.385      | 63            | 21   | 14       | 02 |
| HOMO-1       | -4.092      | 66            | 20   | 00       | 14 |
| HOMO-2       | -4.216      | 65            | 19   | 01       | 15 |
| HOMO-3       | -4.607      | 63            | 36   | 01       | 00 |
| HOMO-4       | -4.773      | 58            | 37   | 00       | 05 |
| HOMO-5       | -5.361      | 02            | 84   | 02       | 13 |
| $\beta$ -MO  |             |               |      |          |    |
| LUMO+5       | -1.096      | 07            | 92   | 00       | 01 |
| LUMO+4       | -1.108      | 06            | 93   | 00       | 01 |
| LUMO+3       | -1.225      | 05            | 94   | 00       | 01 |
| LUMO+2       | -1.262      | 04            | 95   | 00       | 00 |
| LUMO+1       | -3.148      | 65            | 21   | 14       | 00 |
| LUMO         | -3.260      | 64            | 18   | 16       | 01 |
| HOMO         | -3.903      | 68            | 21   | 00       | 11 |
| HOMO-1       | -4.080      | 66            | 19   | 01       | 14 |
| HOMO-2       | -4.440      | 67            | 32   | 01       | 00 |
| HOMO-3       | -4.448      | 71            | 23   | 00       | 06 |
| HOMO-4       | -5.329      | 02            | 86   | 02       | 11 |
| HOMO-5       | -5.475      | 16            | 83   | 01       | 00 |

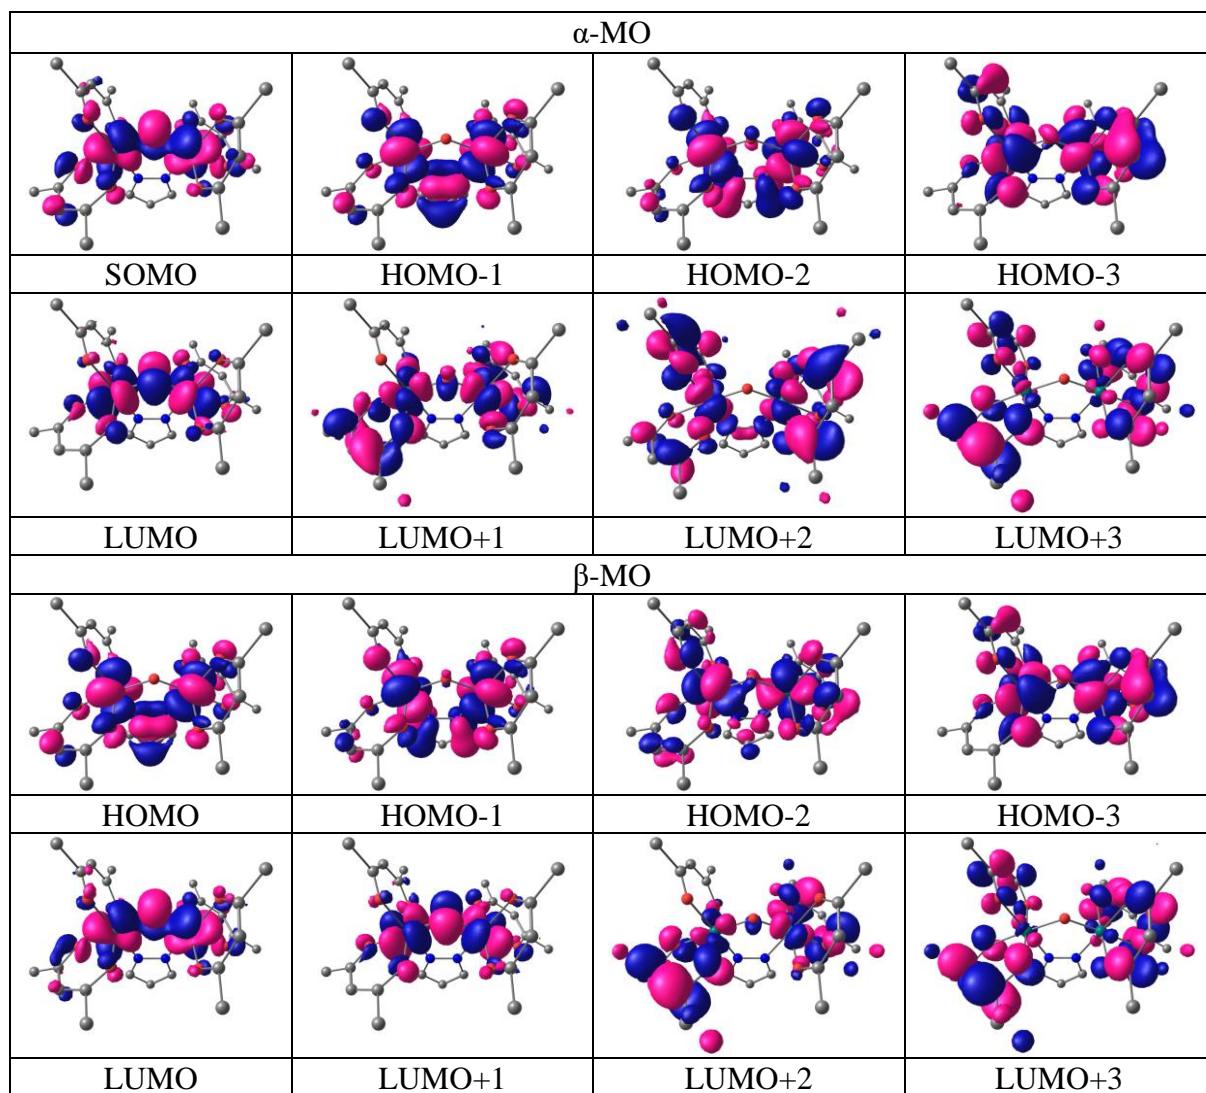

**Table S17** DFT calculated selected MO compositions for **2a<sup>+</sup>** in *S* = 0 state

| MO     | Energy (eV) | % Composition |      |          |    |
|--------|-------------|---------------|------|----------|----|
|        |             | Ru            | acac | $\mu$ -O | Pz |
| LUMO+5 | -4.388      | 56            | 29   | 02       | 13 |
| LUMO+4 | -4.532      | 14            | 82   | 02       | 02 |
| LUMO+3 | -4.562      | 05            | 94   | 00       | 01 |
| LUMO+2 | -4.590      | 54            | 37   | 09       | 01 |
| LUMO+1 | -7.121      | 64            | 16   | 20       | 00 |
| LUMO   | -7.469      | 60            | 25   | 14       | 02 |
| HOMO   | -7.670      | 59            | 21   | 00       | 20 |
| HOMO-1 | -7.784      | 60            | 21   | 02       | 18 |
| HOMO-2 | -8.613      | 49            | 49   | 02       | 00 |
| HOMO-3 | -8.252      | 41            | 50   | 01       | 09 |
| HOMO-4 | -8.627      | 04            | 82   | 02       | 13 |
| HOMO-5 | -8.882      | 30            | 68   | 00       | 02 |

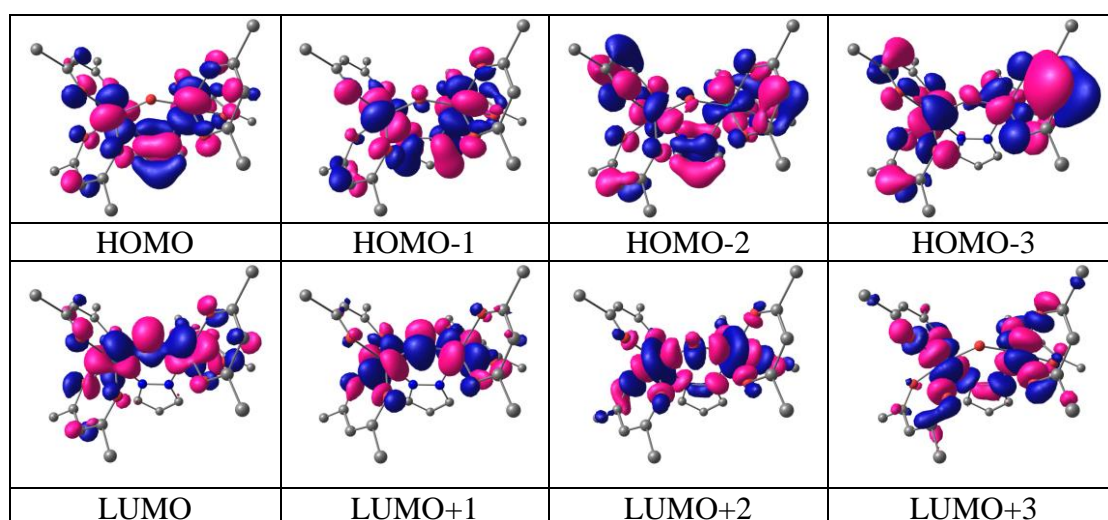

**Table S18** DFT calculated selected MO compositions for **2a<sup>-</sup>** in *S* = 0 state

| MO     | Energy (eV) | % Composition |      |          |    |
|--------|-------------|---------------|------|----------|----|
|        |             | Ru            | acac | $\mu$ -O | Pz |
| LUMO+5 | 3.055       | 55            | 39   | 02       | 04 |
| LUMO+4 | 2.125       | 12            | 86   | 01       | 00 |
| LUMO+3 | 2.123       | 12            | 86   | 01       | 01 |
| LUMO+2 | 2.030       | 03            | 95   | 00       | 01 |
| LUMO+1 | 2.005       | 04            | 95   | 00       | 00 |
| LUMO   | 0.719       | 61            | 16   | 23       | 00 |
| HOMO   | 0.442       | 62            | 20   | 17       | 01 |
| HOMO-1 | -0.217      | 73            | 19   | 00       | 09 |
| HOMO-2 | -0.429      | 69            | 19   | 01       | 12 |
| HOMO-3 | -0.713      | 74            | 26   | 00       | 00 |
| HOMO-4 | -0.759      | 76            | 19   | 00       | 04 |
| HOMO-5 | -2.100      | 01            | 81   | 01       | 16 |

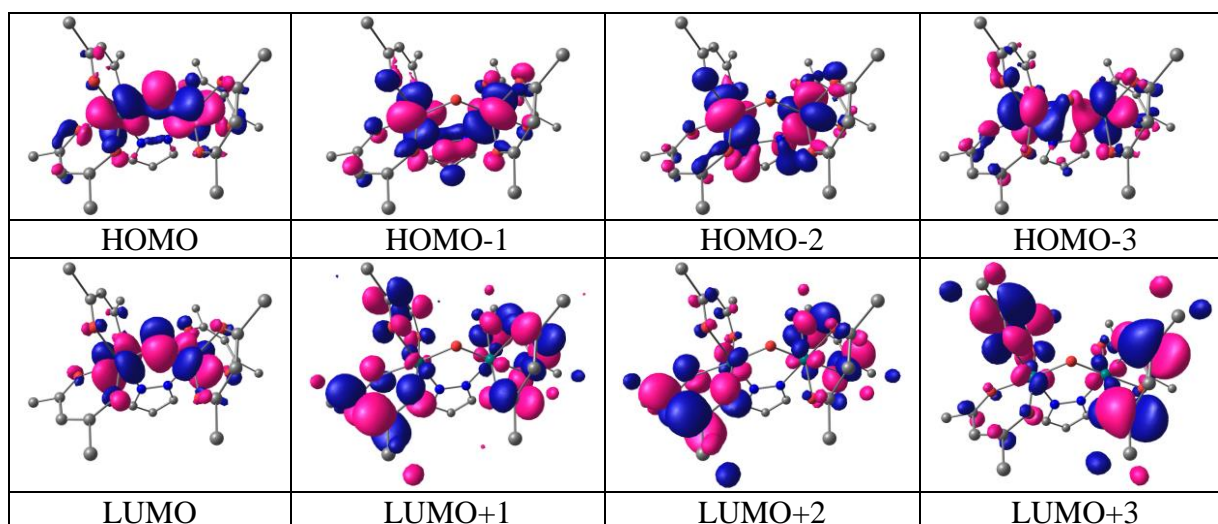

**Table S19** DFT calculated selected MO compositions for **1b** in  $S = 1/2$  state

| MO           | Energy (eV) | % Composition |      |          |    |
|--------------|-------------|---------------|------|----------|----|
|              |             | Ru            | acac | $\mu$ -O | Pz |
| $\alpha$ -MO |             |               |      |          |    |
| LUMO+5       | -1.435      | 20            | 77   | 00       | 04 |
| LUMO+4       | -1.475      | 04            | 96   | 00       | 00 |
| LUMO+3       | -1.501      | 17            | 78   | 02       | 04 |
| LUMO+2       | -1.582      | 26            | 66   | 03       | 06 |
| LUMO+1       | -1.645      | 47            | 48   | 01       | 04 |
| LUMO         | -3.608      | 66            | 14   | 20       | 00 |
| SOMO         | -4.295      | 65            | 18   | 12       | 04 |
| HOMO-1       | -4.385      | 67            | 17   | 01       | 15 |
| HOMO-2       | -4.595      | 60            | 17   | 01       | 17 |
| HOMO-3       | -4.844      | 56            | 42   | 01       | 02 |
| HOMO-4       | -5.136      | 59            | 34   | 01       | 06 |
| HOMO-5       | -5.413      | 09            | 64   | 00       | 27 |
| $\beta$ -MO  |             |               |      |          |    |
| LUMO+5       | -1.431      | 06            | 94   | 00       | 00 |
| LUMO+4       | -1.454      | 11            | 86   | 01       | 02 |
| LUMO+3       | -1.485      | 13            | 83   | 00       | 03 |
| LUMO+2       | -1.569      | 20            | 77   | 01       | 02 |
| LUMO+1       | -3.392      | 65            | 22   | 13       | 00 |
| LUMO         | -3.650      | 68            | 15   | 14       | 03 |
| HOMO         | -4.298      | 67            | 16   | 02       | 15 |
| HOMO-1       | -4.378      | 66            | 20   | 00       | 14 |
| HOMO-2       | -4.623      | 65            | 32   | 00       | 03 |
| HOMO-3       | -4.806      | 75            | 22   | 00       | 03 |
| HOMO-4       | -5.356      | 07            | 54   | 00       | 39 |
| HOMO-5       | -5.497      | 05            | 78   | 01       | 15 |



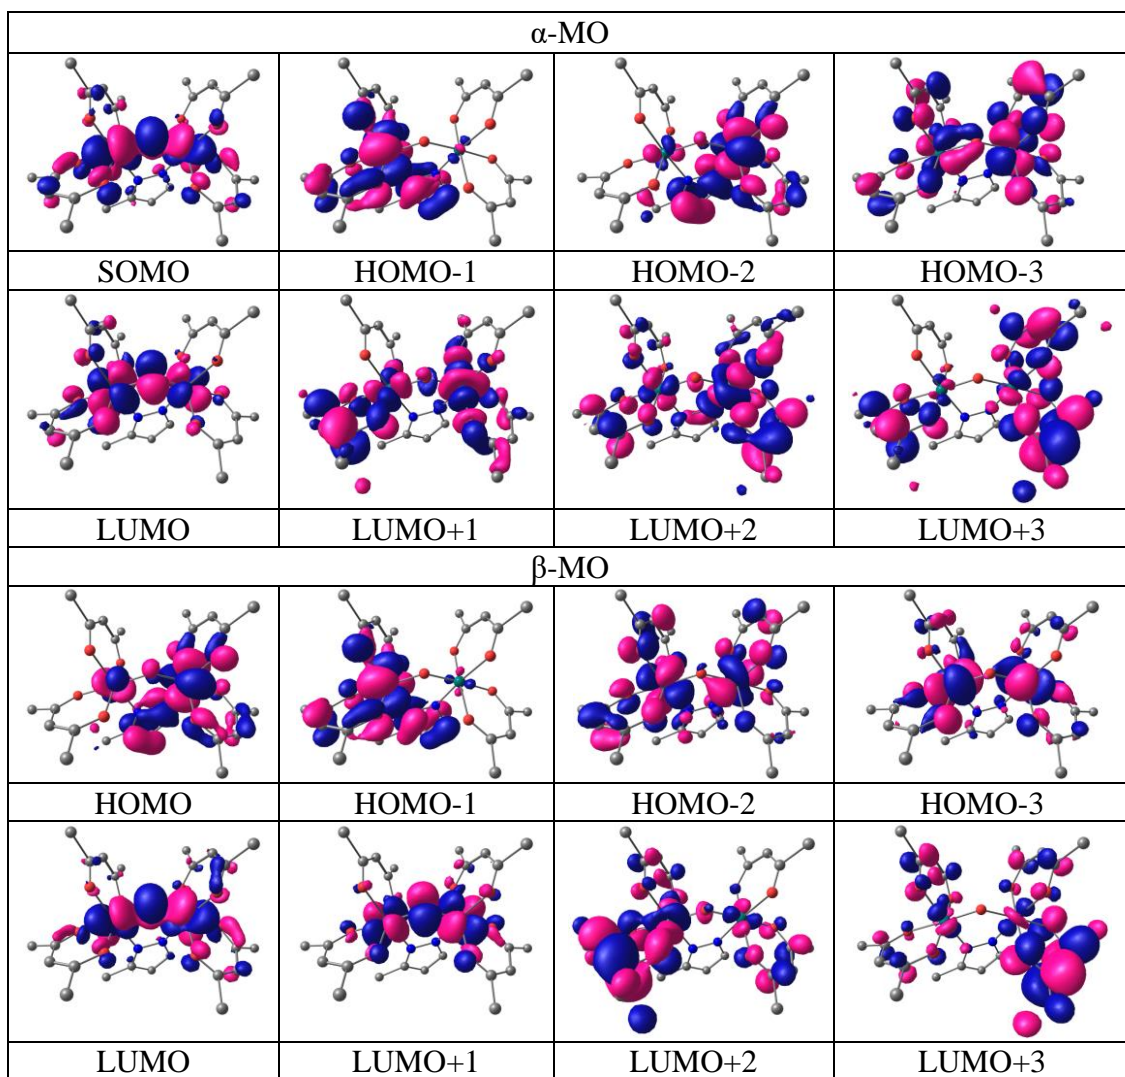



**Table S20** DFT calculated selected MO compositions for **1b<sup>+</sup>** in  $S = 0$  state

| MO     | Energy (eV) | % Composition |      |          |    |
|--------|-------------|---------------|------|----------|----|
|        |             | Ru            | acac | $\mu$ -O | Pz |
| LUMO+5 | -4.634      | 08            | 90   | 00       | 02 |
| LUMO+4 | -4.877      | 53            | 35   | 00       | 12 |
| LUMO+3 | -5.043      | 58            | 36   | 06       | 00 |
| LUMO+2 | -5.057      | 58            | 21   | 05       | 15 |
| LUMO+1 | -7.214      | 64            | 16   | 20       | 00 |
| LUMO   | -7.721      | 61            | 21   | 12       | 06 |
| HOMO   | -7.895      | 59            | 22   | 01       | 18 |
| HOMO-1 | -7.896      | 58            | 18   | 03       | 20 |
| HOMO-2 | -8.130      | 41            | 58   | 00       | 01 |
| HOMO-3 | -8.511      | 39            | 47   | 00       | 13 |
| HOMO-4 | -8.570      | 03            | 85   | 02       | 11 |
| HOMO-5 | -8.708      | 14            | 69   | 05       | 12 |

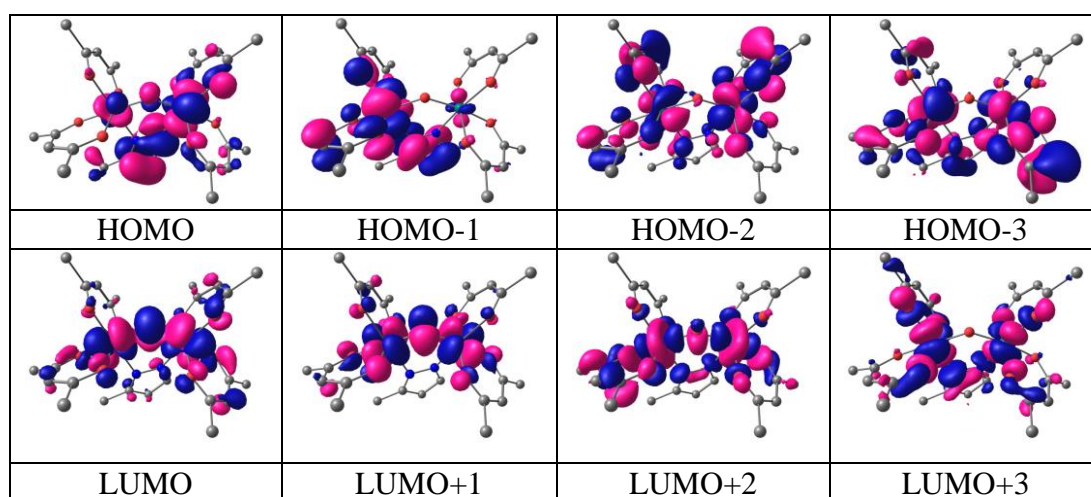

**Table S21** DFT calculated selected MO compositions for **1b<sup>-</sup>** in  $S = 0$  state

| MO     | Energy (eV) | % Composition |      |          |    |
|--------|-------------|---------------|------|----------|----|
|        |             | Ru            | acac | $\mu$ -O | Pz |
| LUMO+5 | 2.273       | 55            | 33   | 00       | 12 |
| LUMO+4 | 1.739       | 10            | 88   | 01       | 01 |
| LUMO+3 | 1.676       | 05            | 94   | 00       | 00 |
| LUMO+2 | 1.664       | 08            | 91   | 00       | 01 |
| LUMO+1 | 1.545       | 06            | 93   | 00       | 01 |
| LUMO   | 0.376       | 63            | 14   | 23       | 00 |
| HOMO   | -0.025      | 66            | 17   | 16       | 02 |
| HOMO-1 | -0.680      | 73            | 16   | 01       | 10 |
| HOMO-2 | -0.796      | 73            | 17   | 00       | 10 |
| HOMO-3 | -1.000      | 76            | 22   | 00       | 02 |
| HOMO-4 | -1.110      | 80            | 19   | 00       | 01 |
| HOMO-5 | -2.176      | 03            | 48   | 00       | 48 |

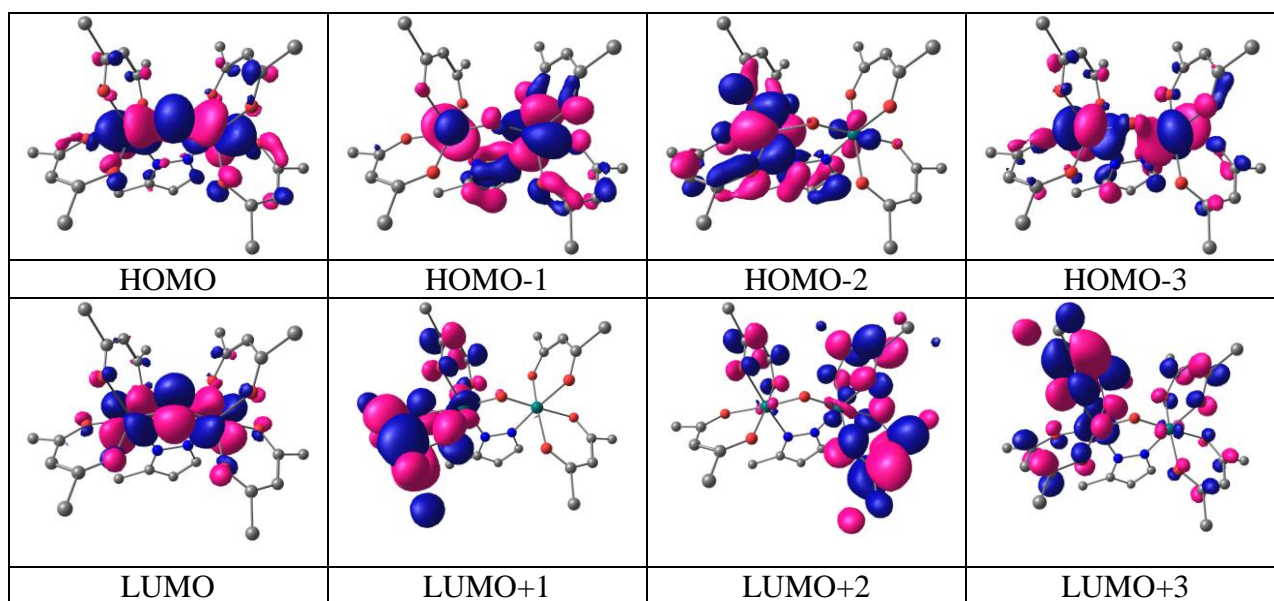

**Table S22** DFT calculated selected MO compositions for **2b** in  $S = 1/2$  State

| MO           | Energy (eV) | % Composition |      |          |    |
|--------------|-------------|---------------|------|----------|----|
|              |             | Ru            | acac | $\mu$ -O | Pz |
| $\alpha$ -MO |             |               |      |          |    |
| LUMO+5       | -1.394      | 27            | 67   | 00       | 05 |
| LUMO+4       | -1.448      | 06            | 93   | 00       | 01 |
| LUMO+3       | -1.560      | 24            | 70   | 01       | 05 |
| LUMO+2       | -1.581      | 26            | 68   | 01       | 06 |
| LUMO+1       | -1.694      | 32            | 64   | 04       | 00 |
| LUMO         | -3.704      | 65            | 13   | 21       | 00 |
| SOMO         | -4.356      | 64            | 19   | 14       | 03 |
| HOMO-1       | -4.413      | 61            | 16   | 00       | 23 |
| HOMO-2       | -4.501      | 62            | 16   | 01       | 21 |
| HOMO-3       | -4.928      | 62            | 36   | 01       | 00 |
| HOMO-4       | -5.035      | 52            | 41   | 01       | 06 |
| HOMO-5       | -5.396      | 09            | 60   | 01       | 31 |
| $\beta$ -MO  |             |               |      |          |    |
| LUMO+5       | -1.419      | 06            | 93   | 00       | 00 |
| LUMO+4       | -1.477      | 14            | 82   | 00       | 03 |
| LUMO+3       | -1.534      | 08            | 90   | 00       | 01 |
| LUMO+2       | -1.608      | 18            | 80   | 02       | 01 |
| LUMO+1       | -3.448      | 66            | 13   | 21       | 00 |
| LUMO         | -3.694      | 68            | 16   | 15       | 01 |
| HOMO         | -4.275      | 64            | 17   | 00       | 19 |
| HOMO-1       | -4.375      | 65            | 16   | 00       | 19 |
| HOMO-2       | -4.669      | 71            | 24   | 01       | 04 |
| HOMO-3       | -4.749      | 67            | 32   | 01       | 00 |
| HOMO-4       | -5.365      | 07            | 54   | 01       | 38 |
| HOMO-5       | -5.456      | 02            | 79   | 01       | 18 |

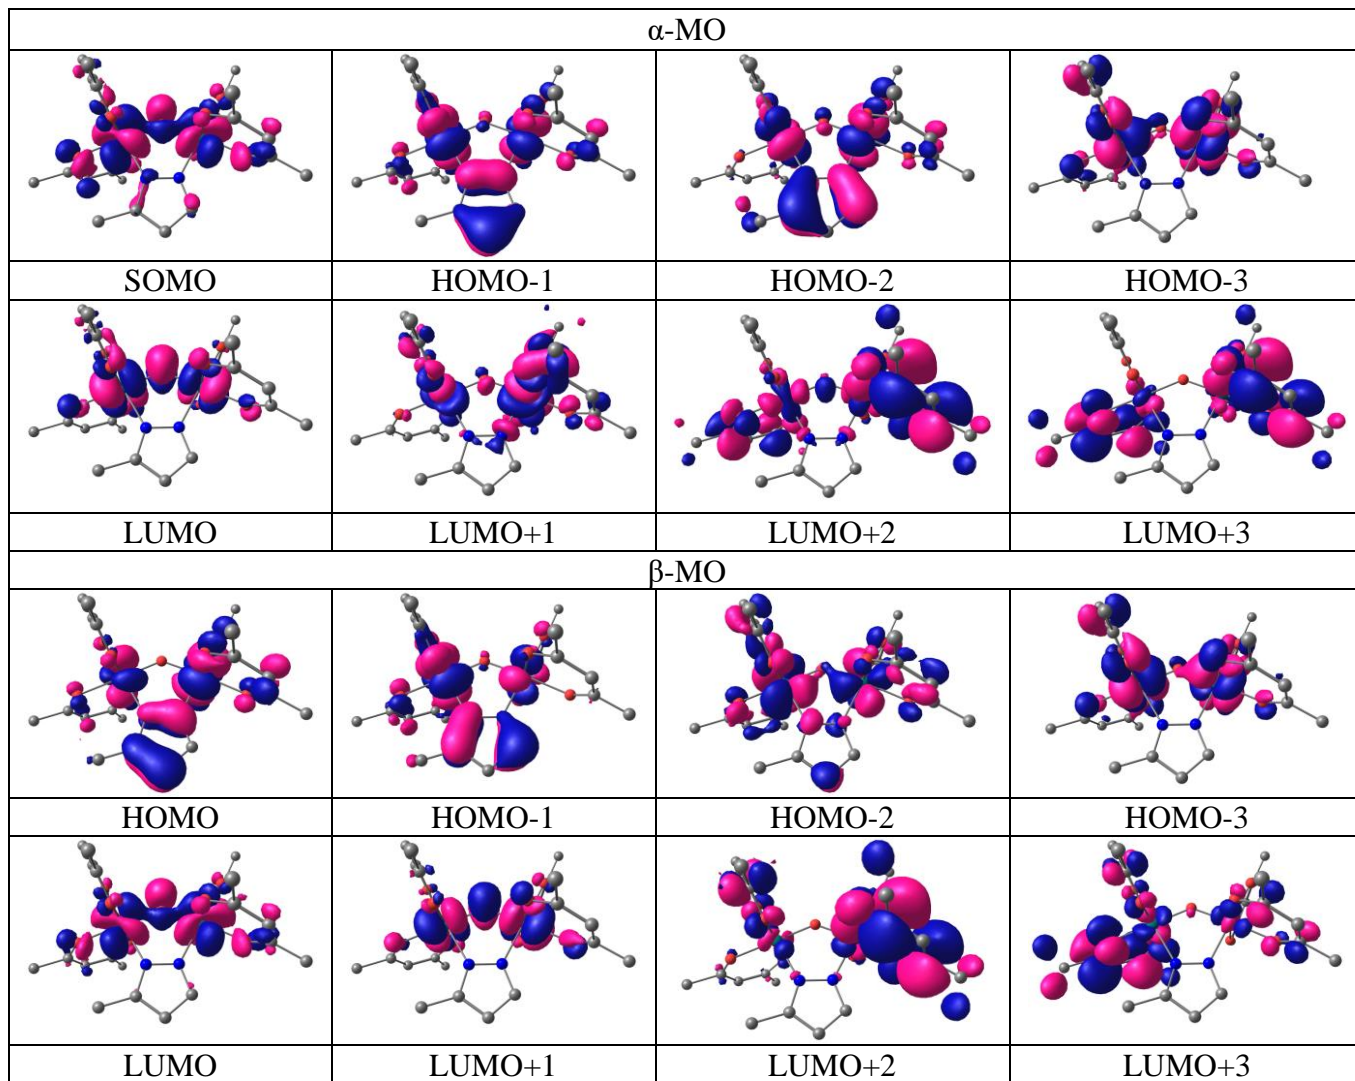

**Table S23** DFT calculated selected MO compositions for **2b<sup>+</sup>** in  $S = 0$  state

| MO     | Energy (eV) | % Composition |      |          |    |
|--------|-------------|---------------|------|----------|----|
|        |             | Ru            | acac | $\mu$ -O | Pz |
| LUMO+5 | -4.658      | 05            | 94   | 00       | 01 |
| LUMO+4 | -4.862      | 55            | 33   | 00       | 11 |
| LUMO+3 | -5.021      | 58            | 27   | 02       | 13 |
| LUMO+2 | -5.106      | 61            | 28   | 10       | 01 |
| LUMO+1 | -7.331      | 65            | 15   | 15       | 00 |
| LUMO   | -7.727      | 61            | 24   | 13       | 03 |
| HOMO   | -7.822      | 51            | 15   | 01       | 33 |
| HOMO-1 | -7.930      | 57            | 19   | 01       | 24 |
| HOMO-2 | -8.346      | 35            | 57   | 01       | 07 |
| HOMO-3 | -8.371      | 40            | 53   | 02       | 05 |
| HOMO-4 | -8.593      | 06            | 75   | 01       | 19 |
| HOMO-5 | -8.691      | 18            | 58   | 02       | 22 |

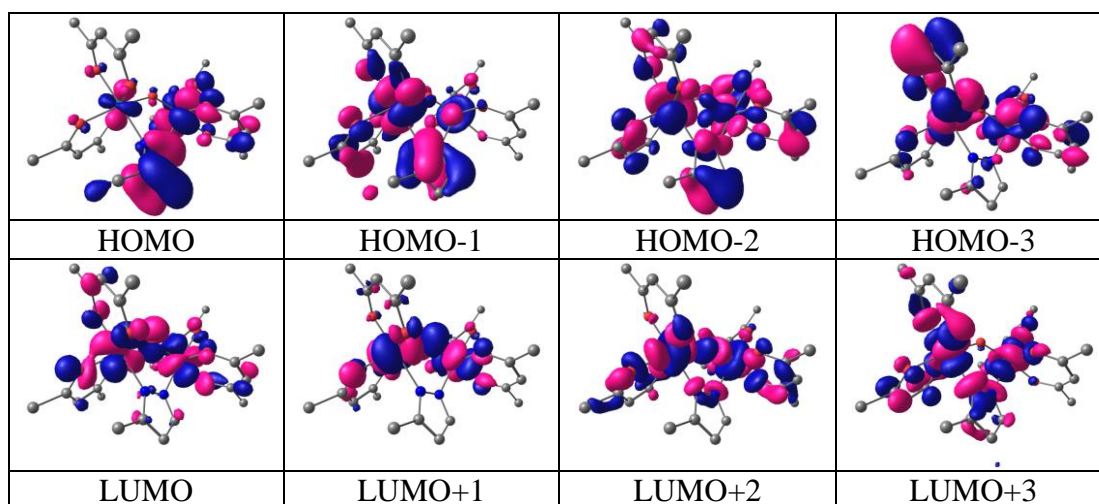

**Table S24** DFT calculated selected MO compositions for **2b<sup>-</sup>** in  $S = 0$  state

| MO     | Energy (eV) | % Composition |      |          |    |
|--------|-------------|---------------|------|----------|----|
|        |             | Ru            | acac | $\mu$ -O | Pz |
| LUMO+5 | 2.297       | 58            | 37   | 01       | 04 |
| LUMO+4 | 1.699       | 10            | 89   | 00       | 01 |
| LUMO+3 | 1.665       | 09            | 89   | 00       | 01 |
| LUMO+2 | 1.644       | 06            | 93   | 01       | 01 |
| LUMO+1 | 1.605       | 04            | 95   | 00       | 01 |
| LUMO   | 0.333       | 63            | 14   | 23       | 00 |
| HOMO   | 0.029       | 65            | 17   | 16       | 01 |
| HOMO-1 | -0.639      | 74            | 16   | 00       | 10 |
| HOMO-2 | -0.799      | 71            | 16   | 00       | 13 |
| HOMO-3 | -1.068      | 78            | 18   | 00       | 04 |
| HOMO-4 | -1.131      | 77            | 23   | 00       | 00 |
| HOMO-5 | -2.220      | 03            | 48   | 00       | 48 |

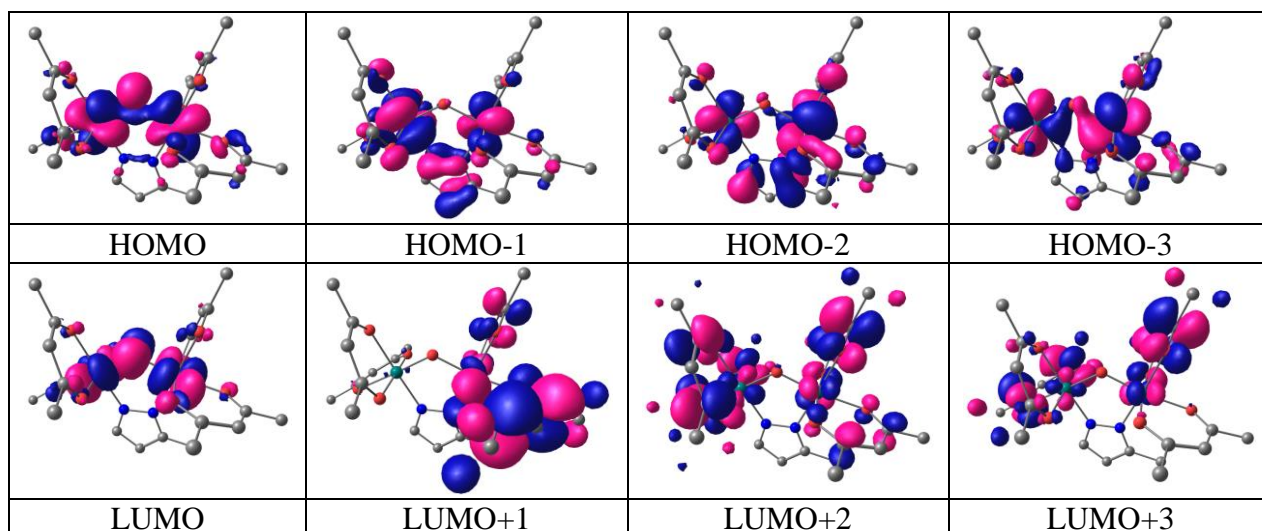

**Table S25** DFT calculated selected MO compositions for **1c** in  $S = 1/2$  state

| MO           | Energy (eV) | % Composition |      |          |    |
|--------------|-------------|---------------|------|----------|----|
|              |             | Ru            | acac | $\mu$ -O | Pz |
| $\alpha$ -MO |             |               |      |          |    |
| LUMO+5       | -0.914      | 56            | 39   | 04       | 01 |
| LUMO+4       | -1.165      | 05            | 93   | 00       | 02 |
| LUMO+3       | -1.173      | 06            | 93   | 01       | 00 |
| LUMO+2       | -1.240      | 08            | 90   | 01       | 00 |
| LUMO+1       | -1.262      | 06            | 93   | 01       | 00 |
| LUMO         | -3.396      | 65            | 14   | 21       | 00 |
| SOMO         | -4.046      | 64            | 19   | 10       | 05 |
| HOMO-1       | -4.132      | 64            | 19   | 10       | 05 |
| HOMO-2       | -4.149      | 60            | 15   | 07       | 16 |
| HOMO-3       | -4.579      | 58            | 41   | 01       | 00 |
| HOMO-4       | -4.890      | 57            | 34   | 02       | 06 |
| HOMO-5       | -5.213      | 10            | 40   | 07       | 42 |
| $\beta$ -MO  |             |               |      |          |    |
| LUMO+5       | -1.134      | 07            | 92   | 01       | 00 |
| LUMO+4       | -1.138      | 06            | 92   | 00       | 01 |
| LUMO+3       | -1.190      | 07            | 92   | 00       | 01 |
| LUMO+2       | -1.237      | 05            | 94   | 00       | 02 |
| LUMO+1       | -3.149      | 65            | 14   | 21       | 00 |
| LUMO         | -3.403      | 66            | 16   | 16       | 01 |
| HOMO         | -3.960      | 64            | 17   | 00       | 19 |
| HOMO-1       | -4.005      | 63            | 16   | 08       | 12 |
| HOMO-2       | -4.386      | 64            | 32   | 01       | 02 |
| HOMO-3       | -4.562      | 72            | 23   | 01       | 03 |
| HOMO-4       | -5.181      | 08            | 38   | 06       | 47 |
| HOMO-5       | -5.220      | 14            | 48   | 12       | 26 |



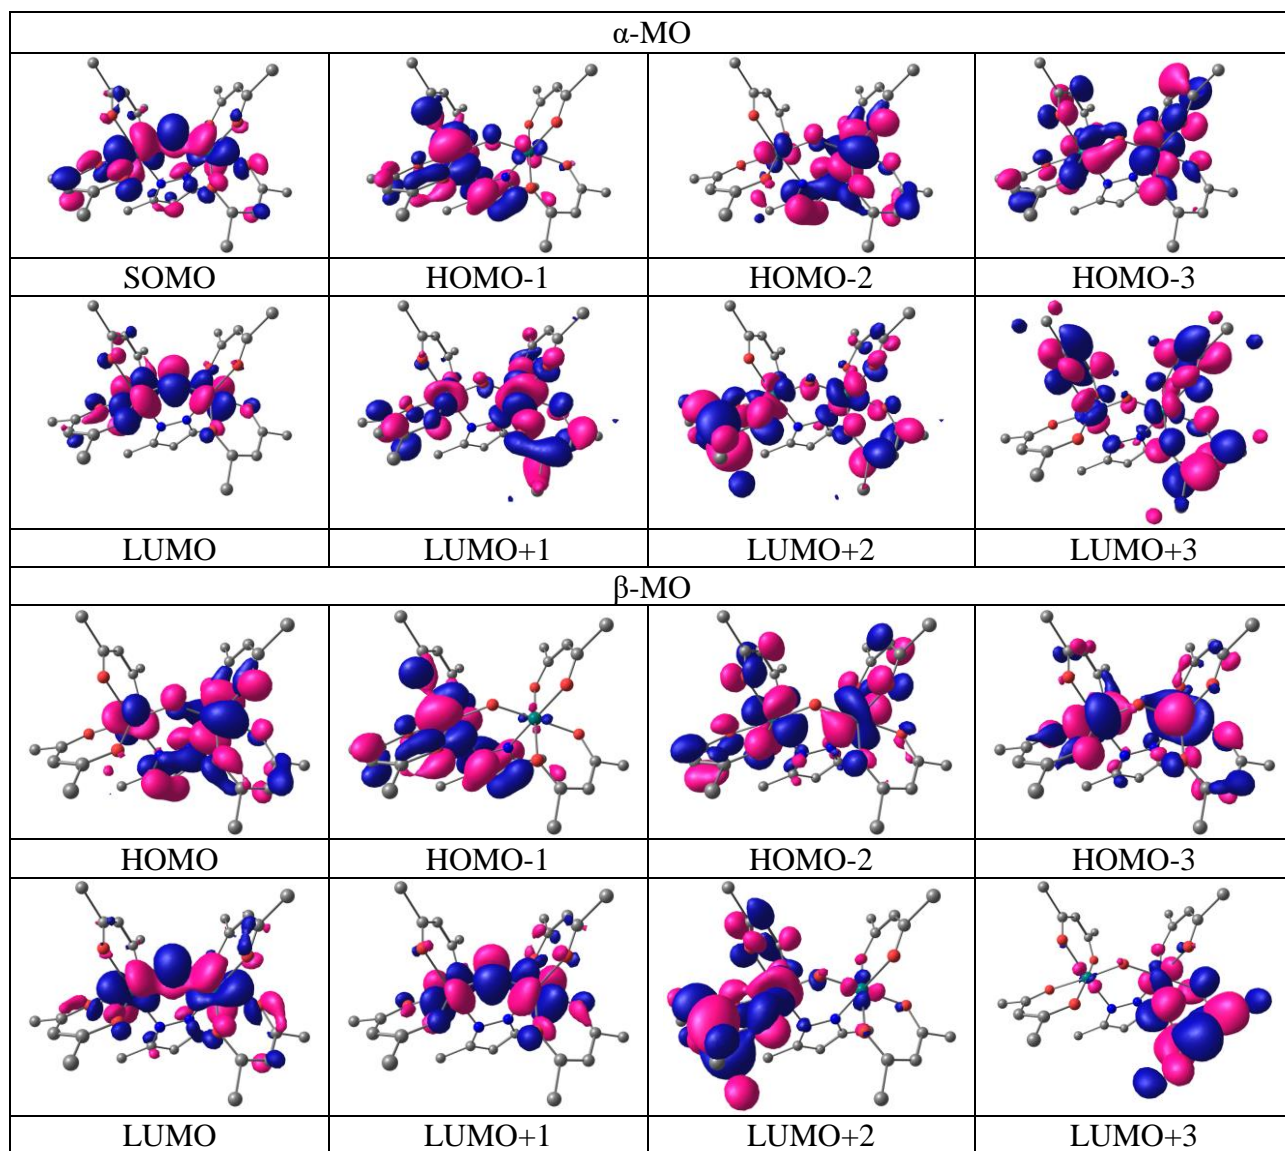



**Table S26** DFT calculated selected MO compositions for **1c<sup>+</sup>** in *S* = 0 state

| MO     | Energy (eV) | % Composition |      |          |    |
|--------|-------------|---------------|------|----------|----|
|        |             | Ru            | acac | $\mu$ -O | Pz |
| LUMO+5 | -4.634      | 09            | 88   | 01       | 02 |
| LUMO+4 | -4.838      | 52            | 36   | 05       | 07 |
| LUMO+3 | -5.008      | 58            | 20   | 07       | 11 |
| LUMO+2 | -5.013      | 58            | 37   | 04       | 01 |
| LUMO+1 | -7.184      | 64            | 16   | 20       | 00 |
| LUMO   | -7.685      | 61            | 20   | 12       | 00 |
| HOMO   | -7.786      | 55            | 19   | 15       | 10 |
| HOMO-1 | -7.953      | 58            | 16   | 03       | 22 |
| HOMO-2 | -8.104      | 41            | 57   | 00       | 02 |
| HOMO-3 | -8.455      | 31            | 53   | 04       | 11 |
| HOMO-4 | -8.538      | 06            | 77   | 02       | 14 |
| HOMO-5 | -8.655      | 16            | 67   | 05       | 08 |

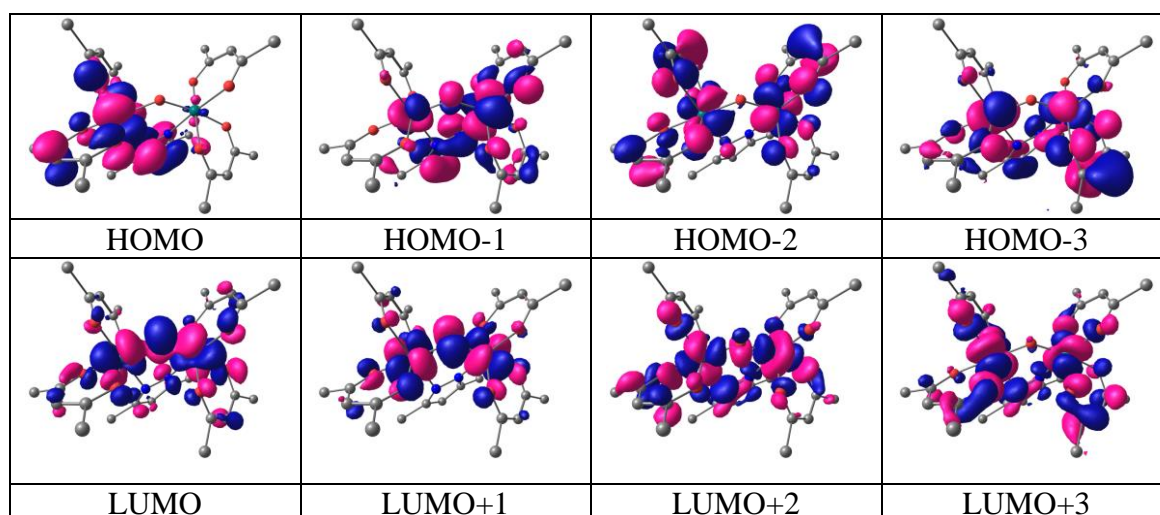

**Table S27** DFT calculated selected MO compositions for **1c<sup>-</sup>** in  $S = 0$  state

| MO     | Energy (eV) | % Composition |      |          |    |
|--------|-------------|---------------|------|----------|----|
|        |             | Ru            | acac | $\mu$ -O | Pz |
| LUMO+5 | 2.281       | 55            | 34   | 04       | 07 |
| LUMO+4 | 1.704       | 11            | 87   | 01       | 02 |
| LUMO+3 | 1.666       | 09            | 90   | 00       | 01 |
| LUMO+2 | 1.645       | 05            | 94   | 00       | 01 |
| LUMO+1 | 1.548       | 06            | 93   | 01       | 00 |
| LUMO   | 0.370       | 63            | 14   | 23       | 00 |
| HOMO   | -0.028      | 66            | 16   | 15       | 02 |
| HOMO-1 | -0.688      | 73            | 15   | 02       | 09 |
| HOMO-2 | -0.762      | 71            | 16   | 03       | 10 |
| HOMO-3 | -1.005      | 75            | 22   | 02       | 01 |
| HOMO-4 | -1.120      | 79            | 19   | 02       | 01 |
| HOMO-5 | -2.156      | 05            | 41   | 02       | 51 |

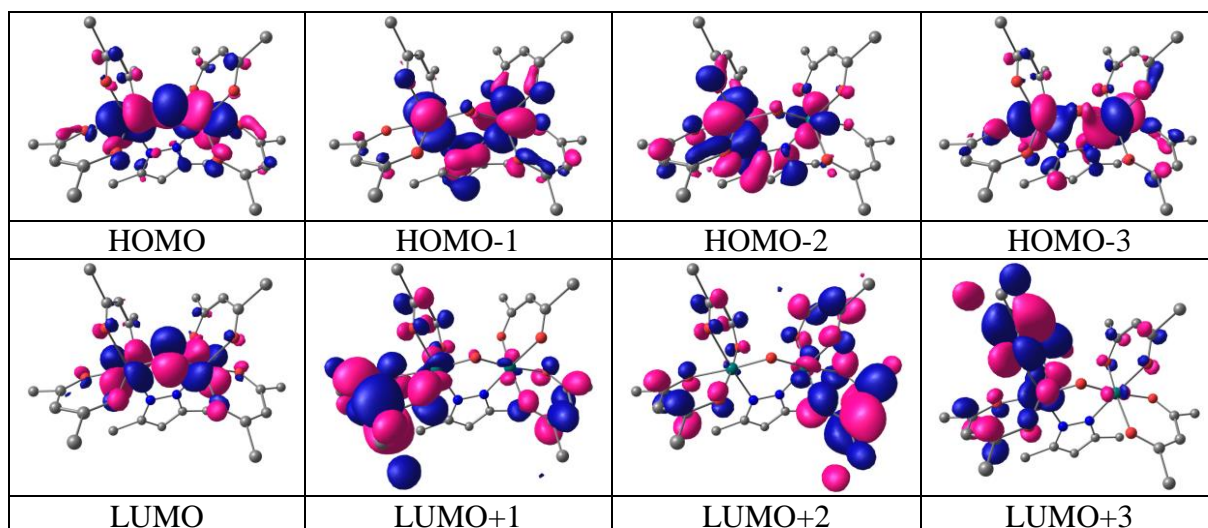

**Table S28** DFT calculated selected MO compositions for **2c** in  $S = 1/2$  state

| MO           | Energy (eV) | % Composition |      |          |    |
|--------------|-------------|---------------|------|----------|----|
|              |             | Ru            | acac | $\mu$ -O | Pz |
| $\alpha$ -MO |             |               |      |          |    |
| LUMO+5       | -0.823      | 55            | 37   | 00       | 08 |
| LUMO+4       | -1.169      | 07            | 93   | 00       | 01 |
| LUMO+3       | -1.222      | 05            | 94   | 00       | 01 |
| LUMO+2       | -1.268      | 10            | 88   | 01       | 02 |
| LUMO+1       | -1.410      | 13            | 85   | 01       | 01 |
| LUMO         | -3.296      | 64            | 14   | 21       | 00 |
| SOMO         | -3.984      | 65            | 20   | 13       | 02 |
| HOMO-1       | -4.013      | 60            | 15   | 00       | 25 |
| HOMO-2       | -4.140      | 60            | 15   | 01       | 24 |
| HOMO-3       | -4.636      | 61            | 35   | 01       | 02 |
| HOMO-4       | -4.682      | 58            | 35   | 01       | 05 |
| HOMO-5       | -5.096      | 19            | 38   | 00       | 43 |
| $\beta$ -MO  |             |               |      |          |    |
| LUMO+5       | -1.143      | 07            | 92   | 01       | 00 |
| LUMO+4       | -1.199      | 06            | 92   | 00       | 01 |
| LUMO+3       | -1.231      | 07            | 92   | 00       | 01 |
| LUMO+2       | -1.371      | 09            | 89   | 01       | 01 |
| LUMO+1       | -3.043      | 65            | 14   | 21       | 00 |
| LUMO         | -3.316      | 68            | 16   | 15       | 01 |
| HOMO         | -3.859      | 64            | 19   | 00       | 17 |
| HOMO-1       | -4.003      | 63            | 16   | 00       | 20 |
| HOMO-2       | -4.317      | 67            | 24   | 01       | 08 |
| HOMO-3       | -4.467      | 69            | 29   | 01       | 00 |
| HOMO-4       | -5.055      | 16            | 33   | 00       | 51 |
| HOMO-5       | -5.191      | 08            | 49   | 01       | 42 |

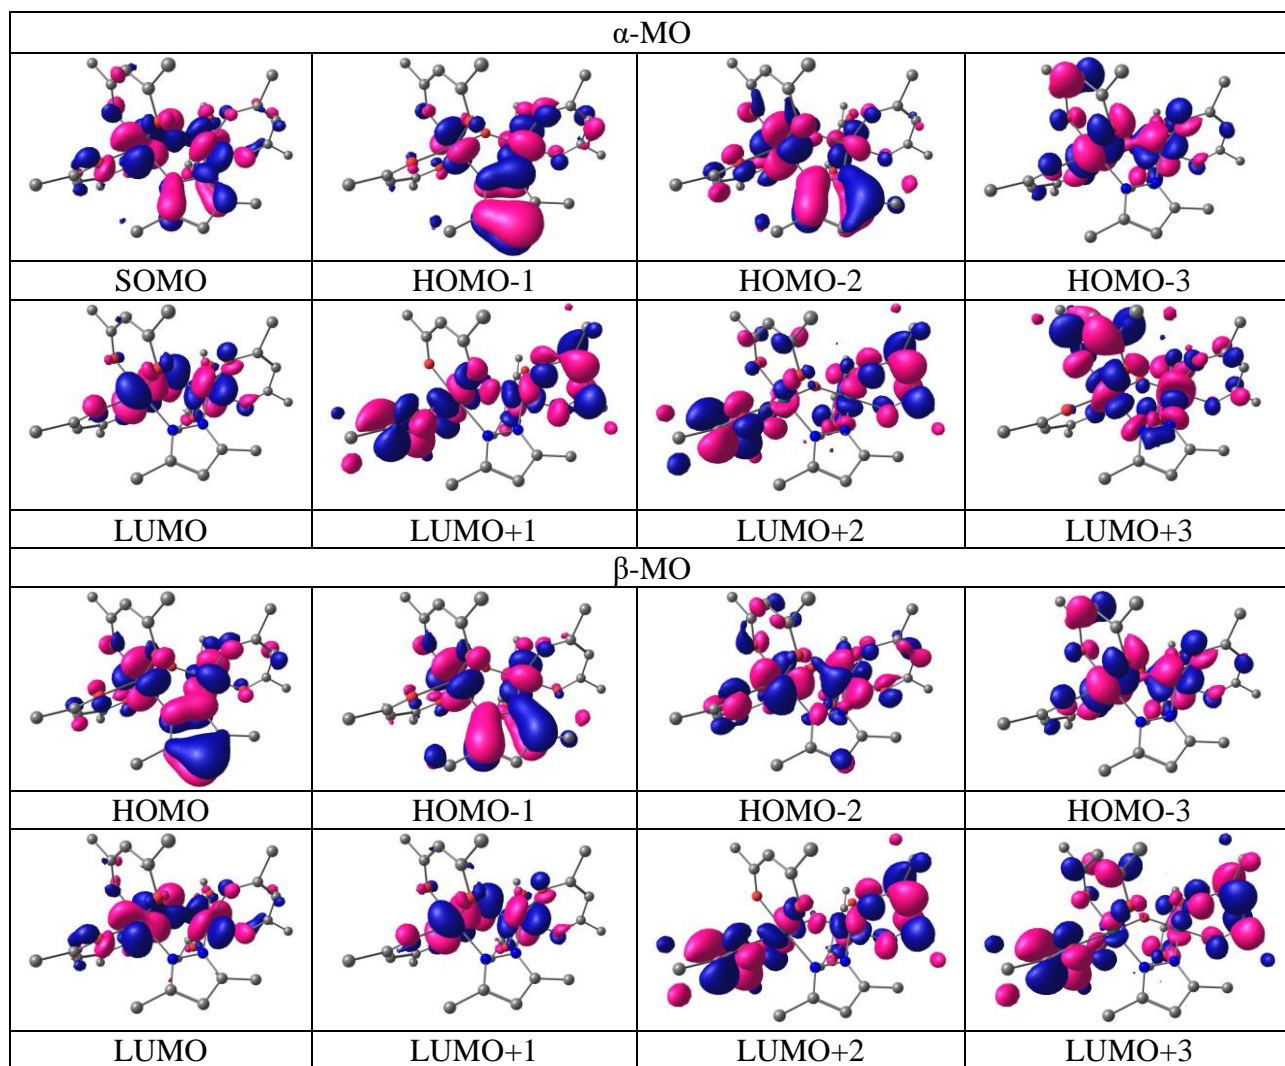

**Table S29** DFT calculated selected MO compositions for **2c<sup>+</sup>** in *S* = 0 state

| MO     | Energy (eV) | % Composition |      |          |    |
|--------|-------------|---------------|------|----------|----|
|        |             | Ru            | acac | $\mu$ -O | Pz |
| LUMO+5 | -4.579      | 11            | 85   | 00       | 03 |
| LUMO+4 | -4.820      | 51            | 39   | 00       | 10 |
| LUMO+3 | -4.973      | 58            | 29   | 01       | 12 |
| LUMO+2 | -5.060      | 54            | 33   | 10       | 03 |
| LUMO+1 | -7.214      | 65            | 15   | 20       | 00 |
| LUMO   | -7.705      | 60            | 23   | 10       | 06 |
| HOMO   | -7.745      | 51            | 17   | 00       | 32 |
| HOMO-1 | -7.782      | 54            | 15   | 01       | 34 |
| HOMO-2 | -8.278      | 49            | 48   | 02       | 00 |
| HOMO-3 | -8.319      | 37            | 50   | 02       | 11 |
| HOMO-4 | -8.544      | 07            | 76   | 01       | 17 |
| HOMO-5 | -8.560      | 09            | 70   | 02       | 19 |

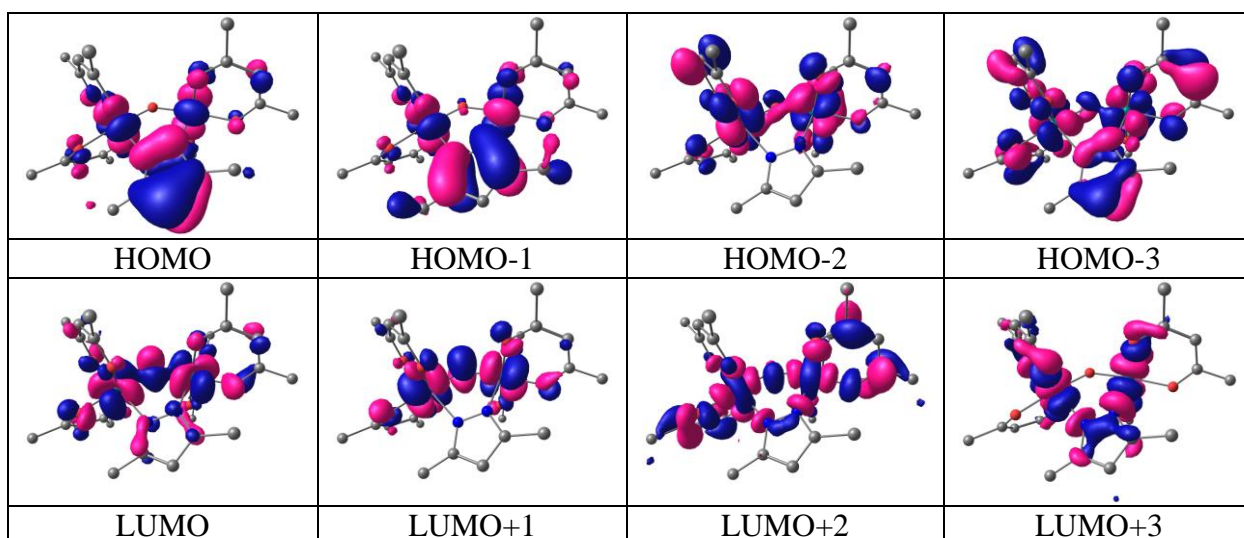

**Table S30** DFT calculated selected MO compositions for **2c<sup>-</sup>** in *S* = 0 state

| MO     | Energy (eV) | % Composition |      |          |    |
|--------|-------------|---------------|------|----------|----|
|        |             | Ru            | acac | $\mu$ -O | Pz |
| LUMO+5 | 3.054       | 56            | 37   | 00       | 07 |
| LUMO+4 | 2.120       | 11            | 88   | 00       | 01 |
| LUMO+3 | 2.039       | 11            | 88   | 01       | 00 |
| LUMO+2 | 2.012       | 05            | 94   | 00       | 01 |
| LUMO+1 | 1.868       | 06            | 92   | 00       | 01 |
| LUMO   | 0.859       | 61            | 17   | 22       | 00 |
| HOMO   | 0.438       | 66            | 17   | 16       | 01 |
| HOMO-1 | -0.203      | 72            | 17   | 00       | 11 |
| HOMO-2 | -0.370      | 69            | 17   | 00       | 13 |
| HOMO-3 | -0.626      | 73            | 20   | 01       | 05 |
| HOMO-4 | -0.701      | 76            | 24   | 01       | 00 |
| HOMO-5 | -1.856      | 07            | 27   | 00       | 65 |

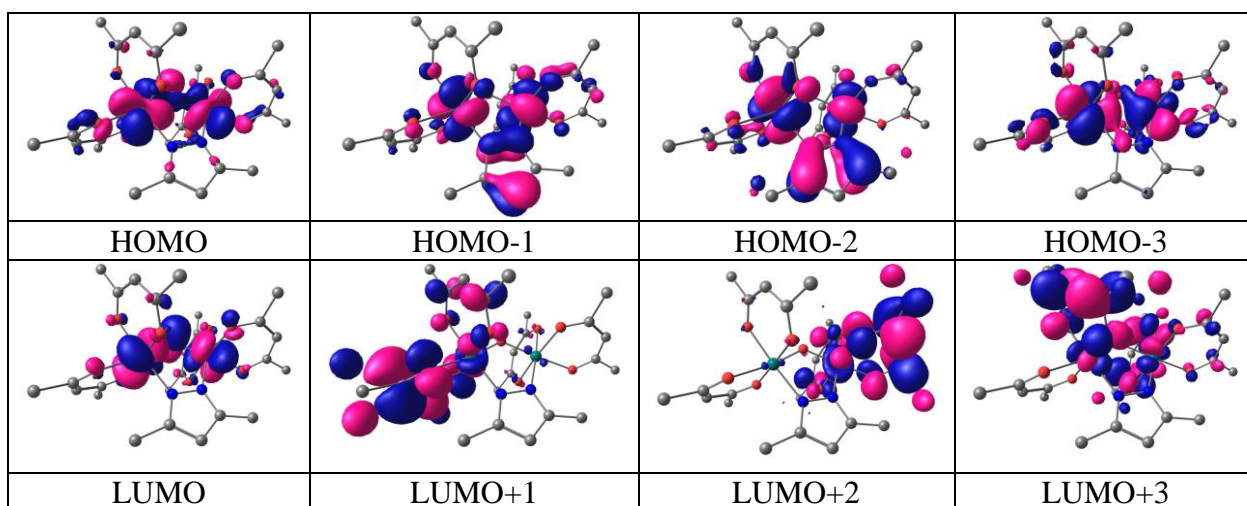

**Table S31** DFT calculated selected MO compositions for **2d** in  $S = 1/2$  state

| MO           | Energy (eV) | % Composition |      |          |    |
|--------------|-------------|---------------|------|----------|----|
|              |             | Ru            | acac | $\mu$ -O | Iz |
| $\alpha$ -MO |             |               |      |          |    |
| LUMO+5       | -1.085      | 24            | 71   | 00       | 04 |
| LUMO+4       | -1.142      | 30            | 63   | 00       | 08 |
| LUMO+3       | -1.375      | 07            | 90   | 01       | 03 |
| LUMO+2       | -1.396      | 17            | 79   | 00       | 04 |
| LUMO+1       | -1.607      | 13            | 85   | 01       | 02 |
| LUMO         | -3.414      | 65            | 16   | 19       | 01 |
| SOMO         | -3.897      | 49            | 12   | 00       | 38 |
| HOMO-1       | -4.078      | 65            | 19   | 12       | 04 |
| HOMO-2       | -4.258      | 54            | 18   | 01       | 27 |
| HOMO-3       | -4.658      | 64            | 34   | 02       | 01 |
| HOMO-4       | -4.845      | 57            | 33   | 06       | 04 |
| HOMO-5       | -4.948      | 41            | 32   | 01       | 27 |
| $\beta$ -MO  |             |               |      |          |    |
| LUMO+5       | -1.115      | 06            | 92   | 00       | 02 |
| LUMO+4       | -1.301      | 09            | 89   | 00       | 02 |
| LUMO+3       | -1.362      | 06            | 91   | 01       | 03 |
| LUMO+2       | -1.549      | 08            | 90   | 00       | 02 |
| LUMO+1       | -3.223      | 63            | 15   | 21       | 01 |
| LUMO         | -3.498      | 65            | 17   | 13       | 04 |
| HOMO         | -3.882      | 43            | 10   | 02       | 44 |
| HOMO-1       | -4.034      | 69            | 21   | 01       | 09 |
| HOMO-2       | -4.432      | 73            | 20   | 20       | 05 |
| HOMO-3       | -4.534      | 65            | 32   | 01       | 02 |
| HOMO-4       | -4.816      | 35            | 27   | 01       | 37 |
| HOMO-5       | -5.382      | 07            | 81   | 01       | 11 |



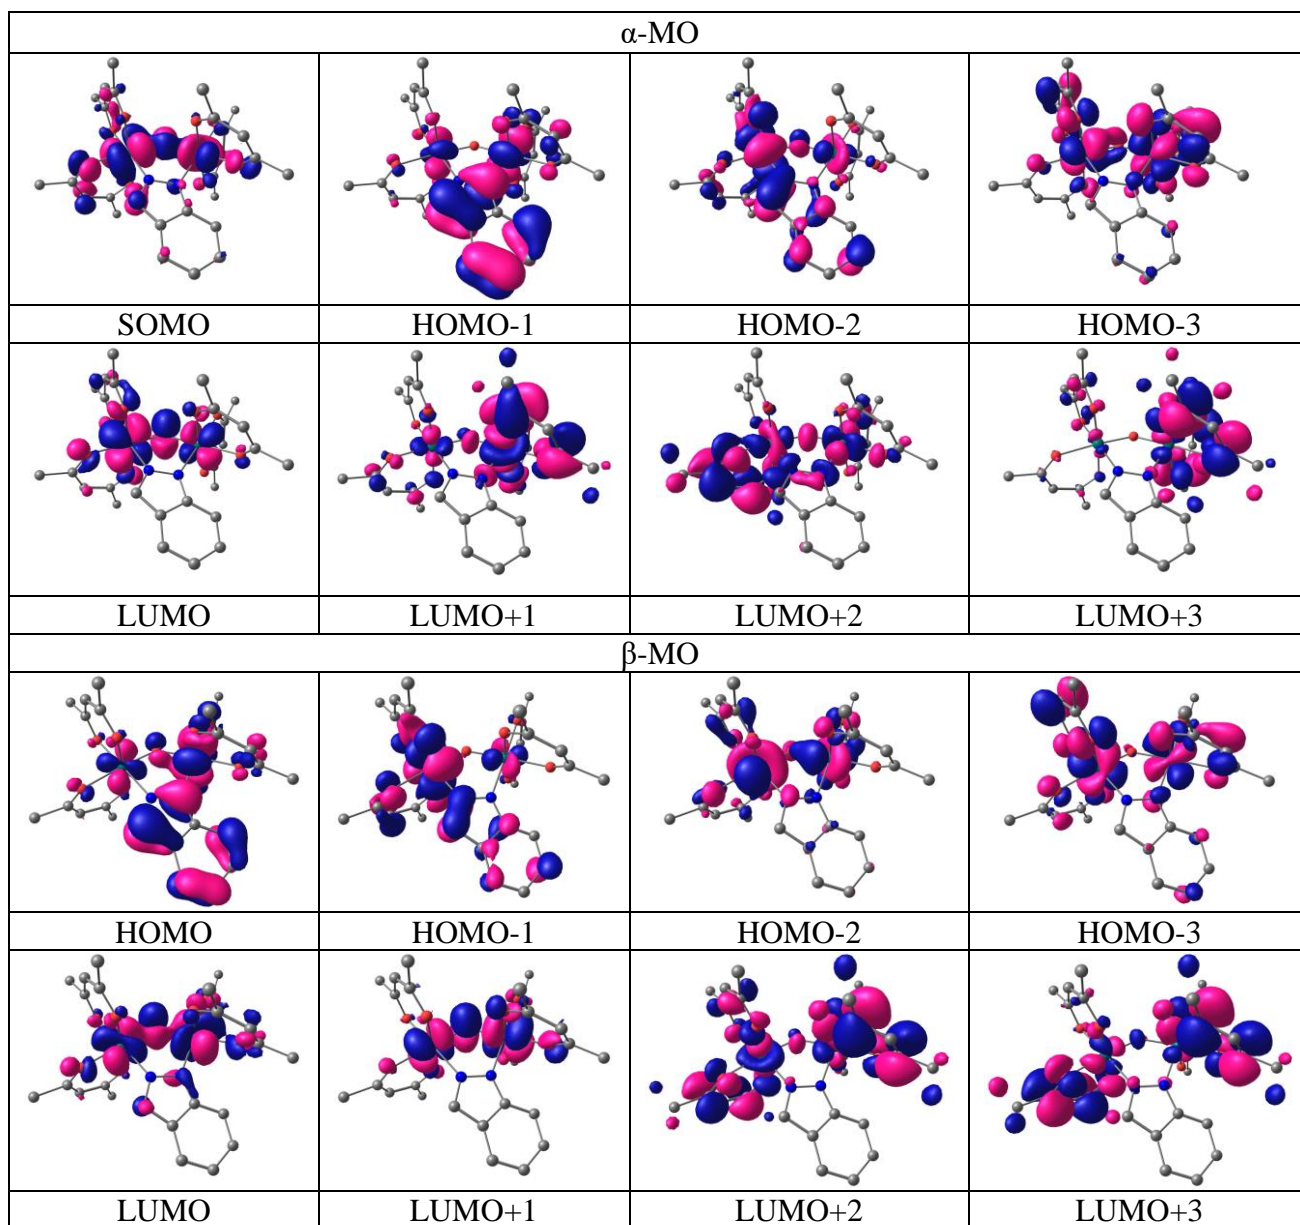



**Table S32** DFT calculated selected MO compositions for **2d<sup>+</sup>** in  $S = 0$  state

| MO     | Energy (eV) | % Composition |      |          |    |
|--------|-------------|---------------|------|----------|----|
|        |             | Ru            | acac | $\mu$ -O | Iz |
| LUMO+5 | -4.561      | 11            | 82   | 00       | 06 |
| LUMO+4 | -4.743      | 54            | 34   | 00       | 12 |
| LUMO+3 | -4.938      | 55            | 23   | 04       | 18 |
| LUMO+2 | -4.989      | 56            | 35   | 07       | 02 |
| LUMO+1 | -7.150      | 0.63          | 16   | 20       | 02 |
| LUMO   | -7.567      | 58            | 21   | 12       | 10 |
| HOMO   | -7.694      | 44            | 17   | 03       | 37 |
| HOMO-1 | -7.859      | 61            | 26   | 01       | 12 |
| HOMO-2 | -8.163      | 34            | 53   | 02       | 11 |
| HOMO-3 | -8.285      | 50            | 44   | 01       | 04 |
| HOMO-4 | -8.401      | 32            | 47   | 01       | 20 |
| HOMO-5 | -8.538      | 12            | 70   | 01       | 18 |

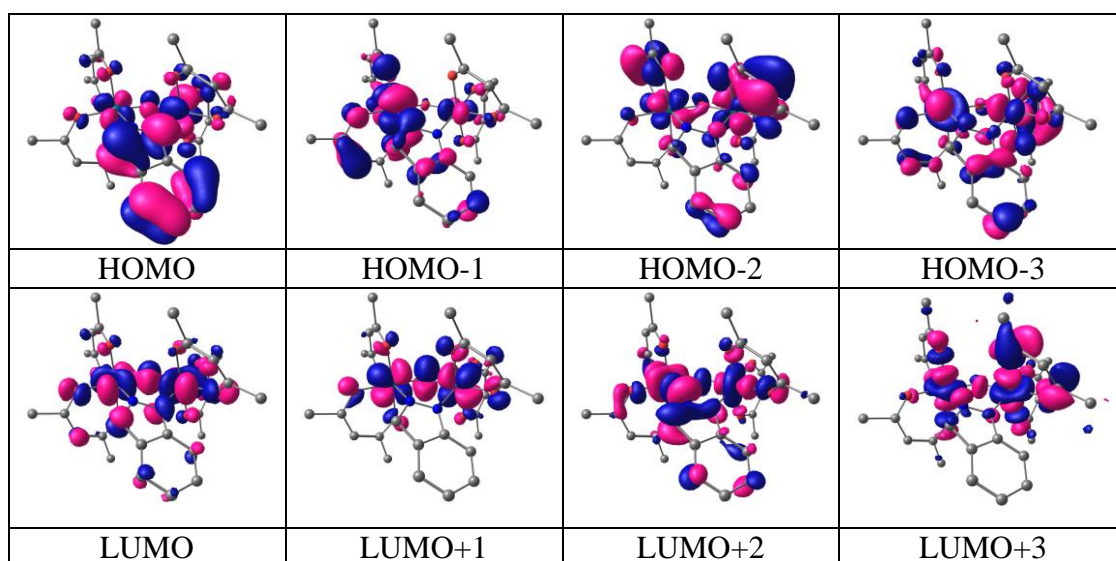

**Table S33** DFT calculated selected MO compositions for **2d<sup>-</sup>** in  $S = 0$  state

| MO     | Energy (eV) | % Composition |      |          |    |
|--------|-------------|---------------|------|----------|----|
|        |             | Ru            | acac | $\mu$ -O | Iz |
| LUMO+5 | -4.561      | 11            | 82   | 00       | 06 |
| LUMO+4 | -4.743      | 54            | 34   | 00       | 12 |
| LUMO+3 | -4.938      | 55            | 23   | 04       | 18 |
| LUMO+2 | -4.989      | 56            | 35   | 07       | 02 |
| LUMO+1 | -7.150      | 0.63          | 16   | 20       | 02 |
| LUMO   | -7.567      | 58            | 21   | 12       | 10 |
| HOMO   | -7.694      | 44            | 17   | 03       | 37 |
| HOMO-1 | -7.859      | 61            | 26   | 01       | 12 |
| HOMO-2 | -8.163      | 34            | 53   | 02       | 11 |
| HOMO-3 | -8.285      | 50            | 44   | 01       | 04 |
| HOMO-4 | -8.401      | 32            | 47   | 01       | 20 |
| HOMO-5 | -8.538      | 12            | 70   | 01       | 18 |

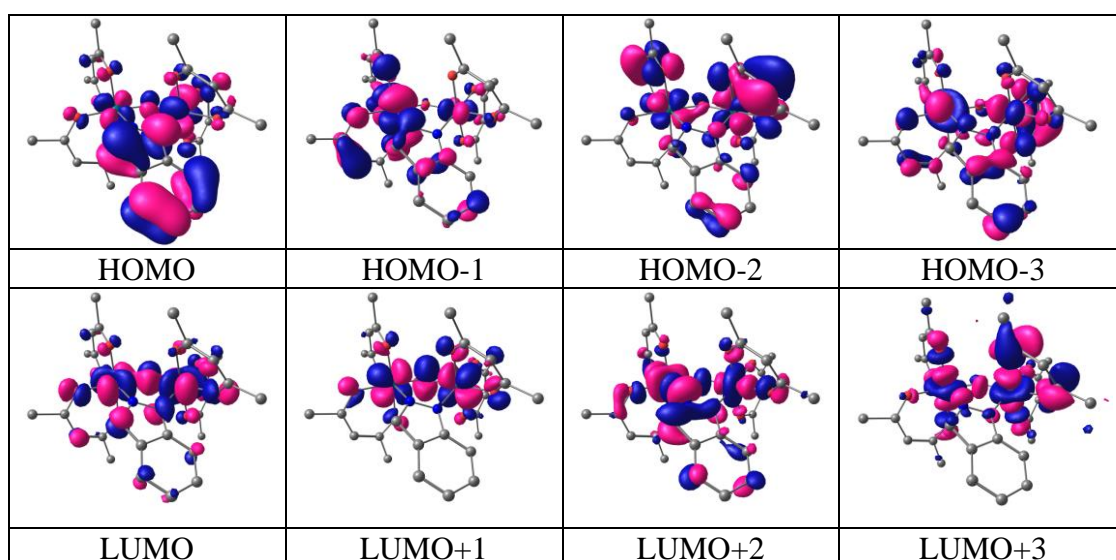

**Table S34** Experimental and TD-DFT (M06L/CPCM/CH<sub>3</sub>CN) calculated electronic transitions

| $\lambda_{\max}/\text{nm}$<br>(expt.) <sup>a</sup><br>( $\epsilon/\text{dm}^3\text{mol}^{-1}$<br>$\text{cm}^{-1}$ ) <sup>b</sup> | $\lambda/\text{nm}$ (DFT)<br>( $f$ ) <sup>c</sup> | Transitions                                  | Character                                                     |
|----------------------------------------------------------------------------------------------------------------------------------|---------------------------------------------------|----------------------------------------------|---------------------------------------------------------------|
| <b>1a<sup>+</sup> (S=0)</b>                                                                                                      |                                                   |                                              |                                                               |
| 520(1700)                                                                                                                        | 558(0.03)                                         | HOMO-10→LUMO+1 (0.58)                        | acac( $\pi$ )/Ru(d $\pi$ )→ Ru(d $\pi$ )/ $\mu$ -O( $\pi^*$ ) |
|                                                                                                                                  |                                                   | HOMO-9→LUMO+1 (0.35)                         | acac( $\pi$ )→ Ru(d $\pi$ )/ $\mu$ -O( $\pi^*$ )              |
| 335(7120)                                                                                                                        | 330(0.01)                                         | HOMO-6→LUMO+2 (0.41)                         | acac( $\pi$ )/Ru(d $\pi$ )→ Ru(d $\pi$ )/acac( $\pi^*$ )      |
|                                                                                                                                  |                                                   | HOMO-2→LUMO+7 (0.39)                         | acac( $\pi$ )/Ru(d $\pi$ )→ acac( $\pi^*$ )/Ru(d $\pi$ )      |
| 272(12600)                                                                                                                       | 290(0.21)                                         | HOMO-3→LUMO+9 (0.29)                         | acac( $\pi$ )/Ru(d $\pi$ )→ acac( $\pi^*$ )                   |
|                                                                                                                                  |                                                   | HOMO-3→LUMO+10 (0.25)                        | acac( $\pi$ )/Ru(d $\pi$ )→ acac( $\pi^*$ )                   |
| <b>1a (S=1/2)</b>                                                                                                                |                                                   |                                              |                                                               |
| 1440 (250)                                                                                                                       | 1380(0.004)                                       | HOMO-1( $\beta$ )→LUMO( $\beta$ )(0.90)      | Ru(d $\pi$ )/ $\mu$ -O( $\pi$ )→Ru(d $\pi$ )/acac( $\pi^*$ )  |
| 540 (7840)                                                                                                                       | 530(0.02)                                         | HOMO-4( $\beta$ )→LUMO( $\beta$ )(0.72)      | acac( $\pi$ )/Pz( $\pi$ )→Ru(d $\pi$ )/acac( $\pi^*$ )        |
| 325 (8000)                                                                                                                       | 350(0.02)                                         | HOMO-2( $\alpha$ )→LUMO+2( $\alpha$ ) (0.54) | Ru(d $\pi$ )/acac( $\pi$ )→acac( $\pi^*$ )                    |
| 270(9330)                                                                                                                        | 260(0.09)                                         | HOMO-4( $\beta$ )→LUMO+5( $\beta$ )(0.38)    | acac( $\pi$ )/Pz( $\pi$ )→acac( $\pi^*$ )                     |
|                                                                                                                                  |                                                   | HOMO-5( $\beta$ )→LUMO+5( $\beta$ )(0.22)    | acac( $\pi$ )→acac( $\pi^*$ )                                 |
| <b>1a<sup>-</sup> (S=0)</b>                                                                                                      |                                                   |                                              |                                                               |
| 582 (5400)                                                                                                                       | 617(0.03)                                         | HOMO-2→LUMO(0.68)                            | Ru(d $\pi$ )→Ru(d $\pi$ )/ $\mu$ -O( $\pi^*$ )                |
| 350 (7000)                                                                                                                       | 336(0.02)                                         | HOMO-4→LUMO+5(0.47)                          | Ru(d $\pi$ )/acac( $\pi$ )→ Ru(d $\pi$ )/acac( $\pi^*$ )      |
|                                                                                                                                  |                                                   | HOMO-2→LUMO+7(0.33)                          | Ru(d $\pi$ )→ Ru(d $\pi$ )/acac( $\pi^*$ )                    |
| 270(19500)                                                                                                                       | 303(0.15)                                         | HOMO-5→LUMO+9(0.45)                          | acac( $\pi$ )→ Ru(d $\pi$ )/acac( $\pi^*$ )                   |
| <b>2a<sup>+</sup> (S=0)</b>                                                                                                      |                                                   |                                              |                                                               |
| 530(1950)                                                                                                                        | 532(0.01)                                         | HOMO-8→LUMO (0.68)                           | acac( $\pi$ )→Ru(d $\pi$ )/acac( $\pi^*$ )                    |
| 330(7000)                                                                                                                        | 338(0.01)                                         | HOMO-5→LUMO+2 (0.67)                         | acac( $\pi$ )/Ru(d $\pi$ )→ Ru(d $\pi$ )/acac( $\pi^*$ )      |
| 276(12300)                                                                                                                       | 265(0.04)                                         | HOMO-6→LUMO+6 (0.46)                         | acac( $\pi$ )/Pz( $\pi$ )→acac( $\pi^*$ )                     |
| <b>2a (S=1/2)</b>                                                                                                                |                                                   |                                              |                                                               |
| 1450(250)                                                                                                                        | 1340(0.004)                                       | HOMO-2( $\beta$ )→LUMO+1( $\beta$ )(0.98)    | Ru(d $\pi$ )/acac( $\pi$ )→Ru(d $\pi$ )/ $\mu$ -O( $\pi^*$ )  |
| 540(8000)                                                                                                                        | 544(0.02)                                         | HOMO-8( $\beta$ )→LUMO( $\beta$ )(0.94)      | acac( $\pi$ )/pz( $\pi$ )→Ru(d $\pi$ )                        |
| 332(8600)                                                                                                                        | 339(0.02)                                         | HOMO-4( $\alpha$ )→LUMO+5( $\alpha$ ) (0.54) | Ru(d $\pi$ )/acac( $\pi$ )→Ru(d $\pi$ )/acac( $\pi^*$ )       |
|                                                                                                                                  |                                                   | HOMO-3( $\alpha$ )→LUMO+4( $\alpha$ ) (0.54) | Ru(d $\pi$ )/acac( $\pi$ )→acac( $\pi^*$ )                    |
| 270(16100)                                                                                                                       | 300(0.17)                                         | HOMO-3( $\beta$ )→LUMO+8( $\beta$ )(0.38)    | acac( $\pi$ ) →acac( $\pi^*$ )/Pz( $\pi^*$ )                  |
|                                                                                                                                  |                                                   | HOMO-4( $\beta$ )→LUMO+7( $\beta$ )(0.21)    | acac( $\pi$ ) →Pz( $\pi^*$ )/acac( $\pi^*$ )                  |
| <b>2a<sup>-</sup> (S=0)</b>                                                                                                      |                                                   |                                              |                                                               |
| 584(5050)                                                                                                                        | 560(0.24)                                         | HOMO-4→LUMO(0.63)                            | Ru(d $\pi$ )→Ru(d $\pi$ )/ $\mu$ -O( $\pi^*$ )                |
| 350(6700)                                                                                                                        | 346(0.06)                                         | HOMO-1→LUMO+7(0.62)                          | Ru(d $\pi$ )/acac( $\pi$ )→Ru(d $\pi$ )/acac( $\pi^*$ )       |
| 266(18400)                                                                                                                       | 290(0.09)                                         | HOMO-5→LUMO+10(0.45)                         | acac( $\pi$ )→acac( $\pi^*$ )                                 |
| <b>1b<sup>+</sup> (S=0)</b>                                                                                                      |                                                   |                                              |                                                               |
| 515(3800)                                                                                                                        | 532(0.10)                                         | HOMO-5→LUMO+1 (0.68)                         | acac( $\pi$ )/Pz( $\pi$ )→Ru(d $\pi$ )/acac( $\pi^*$ )        |

|                             |             |                                              |                                                         |
|-----------------------------|-------------|----------------------------------------------|---------------------------------------------------------|
| 340(9600)                   | 351(0.08)   | HOMO-7→LUMO+2 (0.67)                         | acac( $\pi$ )/Ru(d $\pi$ )→Ru(d $\pi$ )/acac( $\pi^*$ ) |
| 280(17600)                  | 271(0.15)   | HOMO-9→LUMO+8 (0.46)                         | acac( $\pi$ )/Pz( $\pi$ )→acac( $\pi^*$ )/Pz( $\pi^*$ ) |
| <b>1b</b> (S=1/2)           |             |                                              |                                                         |
| 1480(260)                   | 1405(0.004) | HOMO-1( $\beta$ )→LUMO+1( $\beta$ )(0.88)    | Ru(d $\pi$ )→Ru(d $\pi$ )/ $\mu$ -O( $\pi^*$ )          |
| 540(9300)                   | 584(0.20)   | HOMO-4( $\beta$ )→LUMO( $\beta$ )(0.68)      | acac( $\pi$ )/pz( $\pi$ )→Ru(d $\pi$ )                  |
| 330(11300)                  | 362(0.19)   | HOMO-2( $\beta$ )→LUMO+5( $\beta$ ) (0.62)   | Ru(d $\pi$ )/acac( $\pi$ )→Ru(d $\pi$ )/acac( $\pi^*$ ) |
| 272(19600)                  | 280(0.25)   | HOMO-3( $\alpha$ )→LUMO+8( $\alpha$ )(0.32)  | acac( $\pi$ ) →acac( $\pi^*$ )                          |
|                             |             | HOMO-4( $\alpha$ )→LUMO+7( $\alpha$ )(0.25)  | acac( $\pi$ ) →Ru(d $\pi$ )/Pz( $\pi^*$ )               |
| <b>1b<sup>-</sup></b> (S=0) |             |                                              |                                                         |
| 580(12380)                  | 595(0.11)   | HOMO-3→LUMO+1(0.71)                          | Ru(d $\pi$ )→Ru(d $\pi$ )/ $\mu$ -O( $\pi^*$ )          |
| 410(7400)                   | 440(0.06)   | HOMO→LUMO+5(0.55)                            | Ru(d $\pi$ )/acac( $\pi$ )→Ru(d $\pi$ )                 |
| 350(7900)                   | 320(0.07)   | HOMO-6→LUMO+5(0.47)                          | acac( $\pi$ )/pz( $\pi$ )→acac( $\pi^*$ )               |
| <b>2b<sup>+</sup></b> (S=0) |             |                                              |                                                         |
| 520(2900)                   | 505(0.05)   | HOMO-3→LUMO+1 (0.59)                         | acac( $\pi$ )/Pz( $\pi$ )→Ru(d $\pi$ )                  |
| 340(7300)                   | 332(0.06)   | HOMO-6→LUMO+2 (0.48)                         | acac( $\pi$ )/Ru(d $\pi$ )→Ru(d $\pi$ )/acac( $\pi^*$ ) |
|                             |             | HOMO-6→LUMO+3 (0.41)                         | acac( $\pi$ )/Ru(d $\pi$ )→Ru(d $\pi$ )/acac( $\pi^*$ ) |
| 280(13700)                  | 291(0.19)   | HOMO-8→LUMO+8 (0.36)                         | acac( $\pi$ )/Pz( $\pi$ )→acac( $\pi^*$ )               |
|                             |             | HOMO-8→LUMO+10 (0.32)                        | acac( $\pi$ )/Pz( $\pi$ )→acac( $\pi^*$ )/Pz( $\pi^*$ ) |
| <b>2b</b> (S=1/2)           |             |                                              |                                                         |
| 1480(250)                   | 1410(0.001) | HOMO-2( $\beta$ )→LUMO+1( $\beta$ )(0.80)    | Ru(d $\pi$ )→Ru(d $\pi$ )/ $\mu$ -O( $\pi^*$ )          |
| 540(8600)                   | 555(0.21)   | HOMO-3( $\beta$ )→LUMO( $\beta$ )(0.62)      | acac( $\pi$ )/pz( $\pi$ )→Ru(d $\pi$ )                  |
| 330(9500)                   | 310(0.16)   | HOMO-2( $\alpha$ )→LUMO+5( $\alpha$ ) (0.56) | Ru(d $\pi$ )→Ru(d $\pi$ )/acac( $\pi^*$ )               |
| 270(17400)                  | 265(0.13)   | HOMO-4( $\alpha$ )→LUMO+9( $\alpha$ )(0.43)  | acac( $\pi$ )→acac( $\pi^*$ )                           |
| <b>2b<sup>-</sup></b> (S=0) |             |                                              |                                                         |
| 575(12400)                  | 610(0.03)   | HOMO→LUMO+2(0.56)                            | Ru(d $\pi$ )→Ru(d $\pi$ )/ $\mu$ -O( $\pi^*$ )          |
| 415(7500)                   | 421(0.09)   | HOMO→LUMO+5(0.50)                            | Ru(d $\pi$ )→Ru(d $\pi$ )/acac( $\pi^*$ )               |
| 350(7900)                   | 329(0.11)   | HOMO-3→LUMO+5(0.31)                          | Ru(d $\pi$ )/acac( $\pi$ )→acac( $\pi^*$ )              |
|                             |             | HOMO-4→LUMO+5(0.27)                          | acac( $\pi$ )/Ru(d $\pi$ )→acac( $\pi^*$ )              |
| <b>1c<sup>+</sup></b> (S=0) |             |                                              |                                                         |
| 505(3800)                   | 545(0.07)   | HOMO-3→LUMO+1 (0.62)                         | acac( $\pi$ )/Pz( $\pi$ )→Ru(d $\pi$ )/acac( $\pi^*$ )  |
| 340(9500)                   | 315(0.14)   | HOMO→LUMO+2 (0.53)                           | Ru(d $\pi$ )→Ru(d $\pi$ )/acac( $\pi^*$ )               |
| 280(17700)                  | 285(0.23)   | HOMO-5→LUMO+8 (0.41)                         | acac( $\pi$ )/Pz( $\pi$ )→acac( $\pi^*$ )               |
| <b>1c</b> (S=1/2)           |             |                                              |                                                         |
| 1485(250)                   | 1408(0.001) | HOMO( $\beta$ )→LUMO+1( $\beta$ )(0.85)      | Ru(d $\pi$ )→Ru(d $\pi$ )/ $\mu$ -O( $\pi^*$ )          |
| 330(11200)                  | 380(0.20)   | HOMO-4( $\beta$ )→LUMO( $\beta$ )(0.52)      | acac( $\pi$ )/pz( $\pi$ )→Ru(d $\pi$ )/acac( $\pi^*$ )  |
| 270(19500)                  | 290(0.16)   | HOMO-8( $\alpha$ )→LUMO+9( $\alpha$ ) (0.32) | acac( $\pi$ )→acac( $\pi^*$ )                           |
| <b>1c<sup>-</sup></b> (S=0) |             |                                              |                                                         |
| 575(12400)                  | 559(0.05)   | HOMO→LUMO+2(0.50)                            | Ru(d $\pi$ )→Ru(d $\pi$ )/ $\mu$ -O( $\pi^*$ )          |
| 415(7500)                   | 430(0.13)   | HOMO-3→LUMO+4(0.62)                          | Ru(d $\pi$ )/acac( $\pi$ )→Ru(d $\pi$ )/acac( $\pi^*$ ) |
| 350(7960)                   | 315(0.17)   | HOMO-3→LUMO+5(0.30)                          | Ru(d $\pi$ )/acac( $\pi$ )→acac( $\pi^*$ )              |
| <b>2c<sup>+</sup></b> (S=0) |             |                                              |                                                         |
| 515(2900)                   | 550(0.11)   | HOMO-3→LUMO+1 (0.59)                         | acac( $\pi$ )/Pz( $\pi$ )→Ru(d $\pi$ )/acac( $\pi^*$ )  |
| 335(7300)                   | 310(0.03)   | HOMO→LUMO+2 (0.60)                           | Ru(d $\pi$ )→Ru(d $\pi$ )/acac( $\pi^*$ )               |
| 278(13500)                  | 295(0.08)   | HOMO-3→LUMO+9 (0.39)                         | acac( $\pi$ )/Pz( $\pi$ )→acac( $\pi^*$ )               |
| <b>2c</b> (S=1/2)           |             |                                              |                                                         |

|                               |             |                                                             |                                                                             |
|-------------------------------|-------------|-------------------------------------------------------------|-----------------------------------------------------------------------------|
| 1485(240)                     | 1393(0.001) | HOMO( $\beta$ ) $\rightarrow$ LUMO+1( $\beta$ )(0.88)       | Ru(d $\pi$ ) $\rightarrow$ Ru(d $\pi$ )/ $\mu$ -O( $\pi^*$ )                |
| 540(8700)                     | 569(0.12)   | HOMO-2( $\beta$ ) $\rightarrow$ LUMO( $\beta$ )(0.46)       | acac( $\pi$ )/pz( $\pi$ ) $\rightarrow$ Ru(d $\pi$ )/acac( $\pi^*$ )        |
| 330(9500)                     | 310(0.21)   | HOMO-6( $\alpha$ ) $\rightarrow$ LUMO+13( $\alpha$ ) (0.37) | acac( $\pi$ ) $\rightarrow$ acac( $\pi^*$ )/Pz( $\pi^*$ )                   |
| <b>2c<sup>-</sup> (S=0)</b>   |             |                                                             |                                                                             |
| 570(12400)                    | 564(0.24)   | HOMO $\rightarrow$ LUMO+2(0.62)                             | Ru(d $\pi$ ) $\rightarrow$ Ru(d $\pi$ )/ $\mu$ -O( $\pi^*$ )                |
| 450(7500)                     | 421(0.09)   | HOMO-4 $\rightarrow$ LUMO+4(0.60)                           | Ru(d $\pi$ )/ $\mu$ -O( $\pi$ ) $\rightarrow$ Ru(d $\pi$ )/acac( $\pi^*$ )  |
| 350(7800)                     | 312(0.13)   | HOMO-3 $\rightarrow$ LUMO+7(0.29)                           | Ru(d $\pi$ )/acac( $\pi$ ) $\rightarrow$ acac( $\pi^*$ )                    |
| <b>2d<sup>+</sup> (S=0)</b>   |             |                                                             |                                                                             |
| 550(4000)                     | 563(0.22)   | HOMO-2 $\rightarrow$ LUMO+3 (0.65)                          | acac( $\pi$ )/Iz( $\pi$ ) $\rightarrow$ Ru(d $\pi$ )/acac( $\pi^*$ )        |
| 246(27200)                    | 271(0.15)   | HOMO-4 $\rightarrow$ LUMO+5 (0.41)                          | Iz( $\pi$ )/acac( $\pi$ ) $\rightarrow$ acac( $\pi^*$ )                     |
| <b>2d (S=1/2)</b>             |             |                                                             |                                                                             |
| 1480(400)                     | 1415(0.002) | HOMO-1( $\beta$ ) $\rightarrow$ LUMO+1( $\beta$ )(0.79)     | Ru(d $\pi$ ) $\rightarrow$ Ru(d $\pi$ )/ $\mu$ -O( $\pi^*$ )                |
| 545(8900)                     | 532(0.12)   | HOMO-2( $\beta$ ) $\rightarrow$ LUMO( $\beta$ )(0.55)       | acac( $\pi$ )/Iz( $\pi$ ) $\rightarrow$ Ru(d $\pi$ )/acac( $\pi^*$ )        |
| 280(27800)                    | 318(0.19)   | HOMO-6( $\alpha$ ) $\rightarrow$ LUMO+13( $\alpha$ ) (0.33) | acac( $\pi$ ) $\rightarrow$ acac( $\pi^*$ )/Iz( $\pi^*$ )                   |
|                               |             | HOMO-5( $\alpha$ ) $\rightarrow$ LUMO+13( $\alpha$ ) (0.29) | acac( $\pi$ ) $\rightarrow$ acac( $\pi^*$ )/Iz( $\pi^*$ )                   |
| <b>2d<sup>-</sup> (S=0)</b>   |             |                                                             |                                                                             |
| 525(4200)                     | 545(0.03)   | HOMO-2 $\rightarrow$ LUMO+2(0.68)                           | Ru(d $\pi$ ) $\rightarrow$ Ru(d $\pi$ )/ $\mu$ -O( $\pi^*$ )                |
| 270(20800)                    | 285(0.11)   | HOMO-8 $\rightarrow$ LUMO+7(0.30)                           | acac( $\pi$ ) $\rightarrow$ acac( $\pi^*$ )                                 |
| <b>3a<sup>+</sup> (S=1/2)</b> |             |                                                             |                                                                             |
| 1580(450)                     | 1386(0.004) | HOMO-1( $\beta$ ) $\rightarrow$ LUMO( $\beta$ )(0.99)       | Ru(d $\pi$ ) $\rightarrow$ Ru(d $\pi$ )/PzH( $\pi^*$ )                      |
| 890(800)                      | 847(0.11)   | HOMO-2( $\beta$ ) $\rightarrow$ LUMO( $\beta$ )(0.96)       | Ru(d $\pi$ )/PzH( $\pi$ ) $\rightarrow$ Ru(d $\pi$ )/PzH( $\pi^*$ )         |
| 531(3000)                     | 452(0.02)   | HOMO-5( $\beta$ ) $\rightarrow$ LUMO( $\beta$ )(0.97)       | Pz( $\pi$ ) $\rightarrow$ Ru(d $\pi$ )/PzH( $\pi^*$ )                       |
| 350(2600)                     | 352(0.02)   | HOMO-2( $\beta$ ) $\rightarrow$ LUMO+4( $\beta$ )(0.57)     | Ru(d $\pi$ )/PzH( $\pi$ ) $\rightarrow$ PzH( $\pi^*$ )                      |
|                               |             | HOMO-2( $\alpha$ ) $\rightarrow$ LUMO+2( $\alpha$ ) (0.34)  | Ru(d $\pi$ )/Pz( $\pi$ ) $\rightarrow$ PzH( $\pi^*$ )                       |
| 290(8000)                     | 297(0.019)  | HOMO( $\alpha$ ) $\rightarrow$ LUMO+11( $\alpha$ ) (0.45)   | Ru(d $\pi$ )/ $\mu$ -O( $\pi$ ) $\rightarrow$ Pz( $\pi^*$ )/PzH( $\pi^*$ )  |
|                               |             | HOMO( $\alpha$ ) $\rightarrow$ LUMO+12( $\alpha$ ) (0.38)   | Ru(d $\pi$ )/ $\mu$ -O( $\pi$ ) $\rightarrow$ Pz( $\pi^*$ )/Ru(d $\pi$ )    |
| <b>3a (S=0)</b>               |             |                                                             |                                                                             |
| 810(520)                      | 740(0.012)  | HOMO-1 $\rightarrow$ LUMO(0.78)                             | PzH( $\pi$ ) $\rightarrow$ Ru(d $\pi$ )/PzH( $\pi^*$ )/ $\mu$ -O( $\pi^*$ ) |
| 575(3300)                     | 562(0.04)   | HOMO-6 $\rightarrow$ LUMO(0.65)                             | Ru(d $\pi$ ) $\rightarrow$ Ru(d $\pi$ )/PzH( $\pi^*$ )/ $\mu$ -O( $\pi^*$ ) |
| 460(1500)                     | 435(0.19)   | HOMO-7 $\rightarrow$ LUMO+6(0.46)                           | Ru(d $\pi$ )/PzH( $\pi$ ) $\rightarrow$ Pz( $\pi^*$ )/ $\mu$ -O( $\pi^*$ )  |
| 345(2700)                     | 310(0.13)   | HOMO-4 $\rightarrow$ LUMO+6(0.45)                           | PzH( $\pi$ ) $\rightarrow$ Pz( $\pi^*$ )/ $\mu$ -O( $\pi^*$ )               |
| <b>3a<sup>-</sup> (S=1/2)</b> |             |                                                             |                                                                             |
| 595(850)                      | 563(0.02)   | HOMO( $\alpha$ ) $\rightarrow$ LUMO+11( $\alpha$ ) (0.86)   | PzH( $\pi$ ) $\rightarrow$ Ru(d $\pi$ )/PzH( $\pi^*$ )                      |
| 341(6050)                     | 384(0.04)   | HOMO-1( $\alpha$ ) $\rightarrow$ LUMO+15( $\alpha$ ) (0.86) | Ru(d $\pi$ )/ $\mu$ -O( $\pi$ ) $\rightarrow$ Pz( $\pi^*$ )/PzH( $\pi^*$ )  |

<sup>a</sup>Experimental absorption maxima from spectroelectrochemistry in CH<sub>3</sub>CN/ 0.1M Et<sub>4</sub>NCIO<sub>4</sub>.

<sup>b</sup>Molar extinction coefficients in dm<sup>3</sup>mol<sup>-1</sup>cm<sup>-1</sup>. <sup>c</sup>Calculated oscillator strengths.

**Table S35** DFT calculated selected MO compositions for **3a** in  $S = 0$  state

| MO     | Energy (eV) | % Composition |     |          |    |
|--------|-------------|---------------|-----|----------|----|
|        |             | Ru            | PzH | $\mu$ -O | Pz |
| LUMO+5 | 0.415       | 11            | 82  | 02       | 01 |
| LUMO+4 | 0.210       | 06            | 92  | 00       | 01 |
| LUMO+3 | 0.142       | 07            | 92  | 00       | 02 |
| LUMO+2 | 0.101       | 06            | 92  | 00       | 02 |
| LUMO+1 | -0.094      | 06            | 92  | 00       | 02 |
| LUMO   | -0.191      | 08            | 89  | 20       | 01 |
| HOMO   | -1.203      | 39            | 36  | 23       | 02 |
| HOMO-1 | -1.943      | 63            | 17  | 18       | 02 |
| HOMO-2 | -2.554      | 75            | 11  | 03       | 11 |
| HOMO-3 | -2.634      | 75            | 11  | 03       | 11 |
| HOMO-4 | -2.835      | 78            | 17  | 00       | 05 |
| HOMO-5 | -2.898      | 74            | 09  | 00       | 17 |

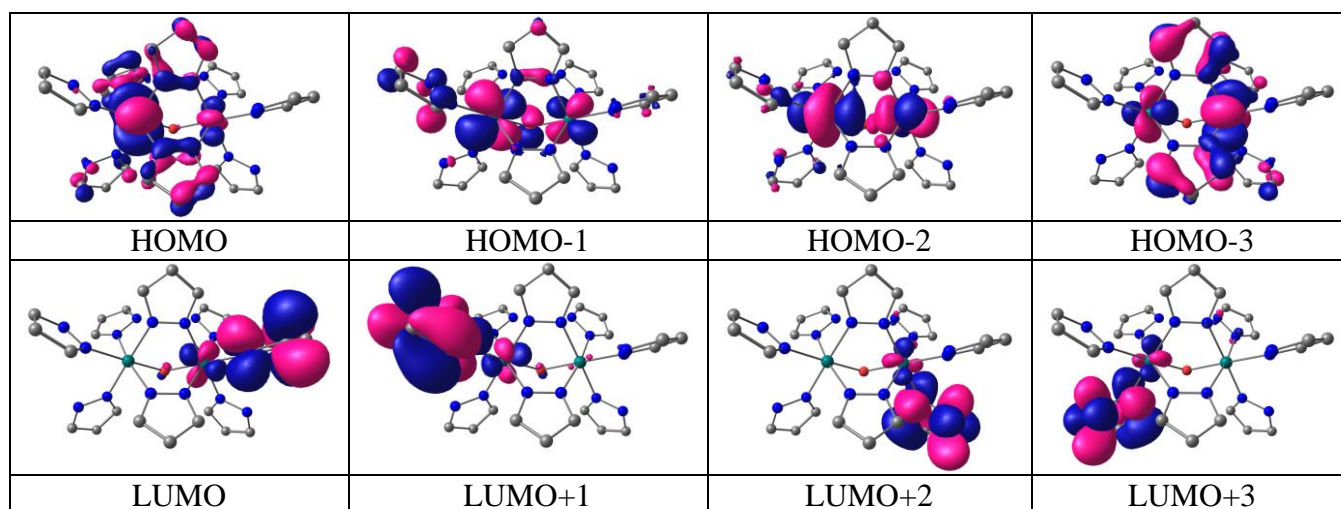

**Table S36** DFT calculated selected MO compositions for **3a<sup>+</sup>** in  $S = 1/2$  state

| MO           | energy (eV) | % composition |     |          |    |
|--------------|-------------|---------------|-----|----------|----|
|              |             | Ru            | PzH | $\mu$ -O | Pz |
| $\alpha$ -MO |             |               |     |          |    |
| LUMO+5       | -2.610      | 04            | 94  | 00       | 02 |
| LUMO+4       | -2.698      | 08            | 91  | 01       | 01 |
| LUMO+3       | -2.738      | 05            | 93  | 00       | 02 |
| LUMO+2       | -2.812      | 04            | 94  | 00       | 02 |
| LUMO+1       | -3.038      | 05            | 94  | 01       | 00 |
| LUMO         | -3.657      | 06            | 92  | 01       | 01 |
| SOMO         | -5.261      | 59            | 18  | 21       | 03 |
| HOMO-1       | -5.581      | 69            | 14  | 11       | 06 |
| HOMO-2       | -5.953      | 69            | 10  | 04       | 17 |
| HOMO-3       | -6.102      | 73            | 09  | 09       | 14 |
| HOMO-4       | -6.317      | 81            | 07  | 01       | 11 |
| HOMO-5       | -6.523      | 78            | 16  | 00       | 06 |
| $\beta$ -MO  |             |               |     |          |    |
| LUMO+5       | -2.628      | 08            | 89  | 00       | 02 |
| LUMO+4       | -2.731      | 05            | 93  | 00       | 02 |
| LUMO+3       | -2.794      | 03            | 95  | 00       | 02 |
| LUMO+2       | -3.022      | 05            | 93  | 00       | 02 |
| LUMO+1       | 3.509       | 10            | 86  | 03       | 01 |
| LUMO         | -4.434      | 41            | 34  | 23       | 02 |
| HOMO         | -5.401      | 68            | 14  | 14       | 04 |
| HOMO-1       | -5.826      | 70            | 11  | 03       | 16 |
| HOMO-2       | -5.964      | 73            | 09  | 04       | 14 |
| HOMO-3       | -6.094      | 16            | 32  | 00       | 05 |
| HOMO-4       | -6.188      | 81            | 07  | 01       | 11 |
| HOMO-5       | -7.346      | 05            | 03  | 10       | 83 |

| $\alpha$ -MO                                                                        |                                                                                     |                                                                                      |                                                                                       |
|-------------------------------------------------------------------------------------|-------------------------------------------------------------------------------------|--------------------------------------------------------------------------------------|---------------------------------------------------------------------------------------|
| 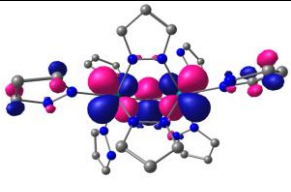   |    |    |    |
| SOMO                                                                                | HOMO-1                                                                              | HOMO-2                                                                               | HOMO-3                                                                                |
|    |    |    |    |
| LUMO                                                                                | LUMO+1                                                                              | LUMO+2                                                                               | LUMO+3                                                                                |
| $\beta$ -MO                                                                         |                                                                                     |                                                                                      |                                                                                       |
|    |    |    |    |
| HOMO                                                                                | HOMO-1                                                                              | HOMO-2                                                                               | HOMO-3                                                                                |
|  |  |  |  |
| LUMO                                                                                | LUMO+1                                                                              | LUMO+2                                                                               | LUMO+3                                                                                |



**Table S37** DFT calculated selected MO compositions for **3a<sup>-</sup>** in  $S = 1/2$  state

| MO           | Energy (eV) | % Composition |     |          |    |
|--------------|-------------|---------------|-----|----------|----|
|              |             | Ru            | PzH | $\mu$ -O | Pz |
| $\alpha$ -MO |             |               |     |          |    |
| LUMO+5       | 2.899       | 10            | 87  | 01       | 02 |
| LUMO+4       | 2.859       | 22            | 77  | 00       | 01 |
| LUMO+3       | 2.696       | 04            | 94  | 01       | 01 |
| LUMO+2       | 2.571       | 12            | 86  | 00       | 02 |
| LUMO+1       | 2.454       | 01            | 98  | 00       | 01 |
| LUMO         | 2.411       | 15            | 84  | 00       | 01 |
| SOMO         | 2.397       | 19            | 80  | 00       | 01 |
| HOMO-1       | 1.220       | 45            | 26  | 27       | 02 |
| HOMO-2       | 0.451       | 70            | 15  | 12       | 04 |
| HOMO-3       | 2.218       | 80            | 09  | 03       | 07 |
| HOMO-4       | -0.015      | 73            | 14  | 04       | 09 |
| HOMO-5       | -0.092      | 81            | 15  | 00       | 04 |
| $\beta$ -MO  |             |               |     |          |    |
| LUMO+5       | 2.885       | 33            | 66  | 00       | 01 |
| LUMO+4       | 2.866       | 36            | 63  | 00       | 01 |
| LUMO+3       | 2.711       | 54            | 45  | 00       | 01 |
| LUMO+2       | 2.697       | 58            | 41  | 00       | 01 |
| LUMO+1       | 2.565       | 37            | 61  | 00       | 02 |
| LUMO         | 2.493       | 03            | 96  | 00       | 01 |
| HOMO         | 1.239       | 47            | 23  | 27       | 02 |
| HOMO-1       | 0.453       | 70            | 14  | 12       | 07 |
| HOMO-2       | 0.225       | 81            | 09  | 03       | 07 |
| HOMO-3       | -0.003      | 74            | 13  | 09       | 04 |
| HOMO-4       | -0.077      | 81            | 15  | 00       | 04 |
| HOMO-5       | -0.184      | 76            | 11  | 00       | 13 |

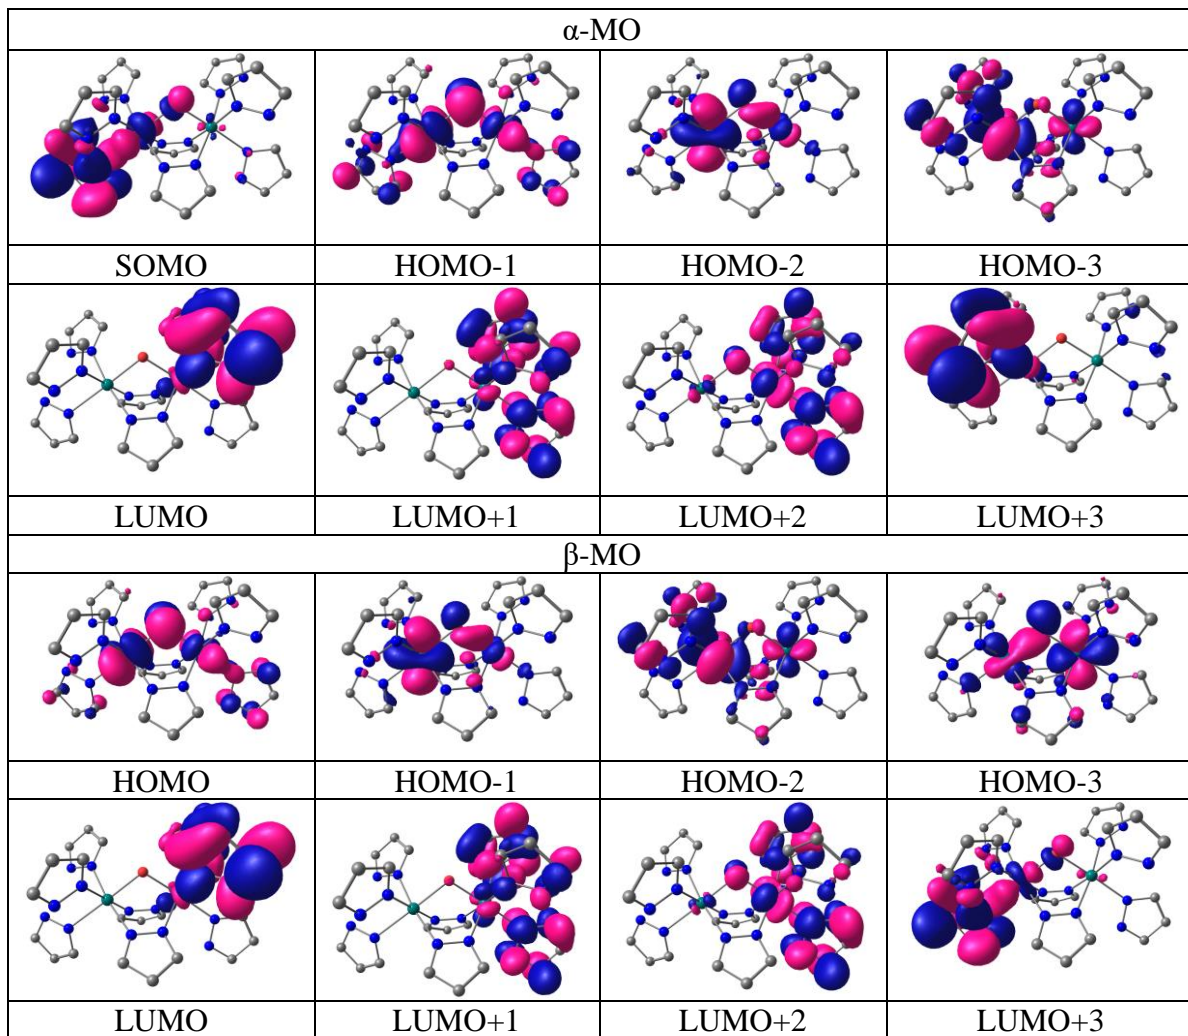

Supplement: d1dt03076k1.pdf [file d1dt03076k1.pdf]
